# Supplementary material for: Lanthanum triflate catalysed acyl transfer from β-diketones to amines: conversion of aryl methyl ketones to amides
Source: Royal Society of Chemistry journal article supplement (doi:10.1039/d6ra03708a), 2026-06-01

## Lanthanum Triflate Catalysed Acyl Transfer from $\beta$ -Diketones to Amines:

### Conversion of Aryl Methyl Ketones to Amides

Rajendra Prasad, Purnima Pradhan, Partha Ghosh\*

\*Department of Chemistry, Central University of Jharkhand, Cheri-Manatu, Ranchi-835222, India

Email: [partha.ghosh@cuja.ac.in](mailto:partha.ghosh@cuja.ac.in)

#### Table of Contents

1. Copies of  $^1\text{H}$  and  $^{13}\text{C}$  NMR Spectra

S2

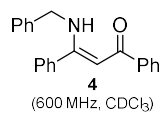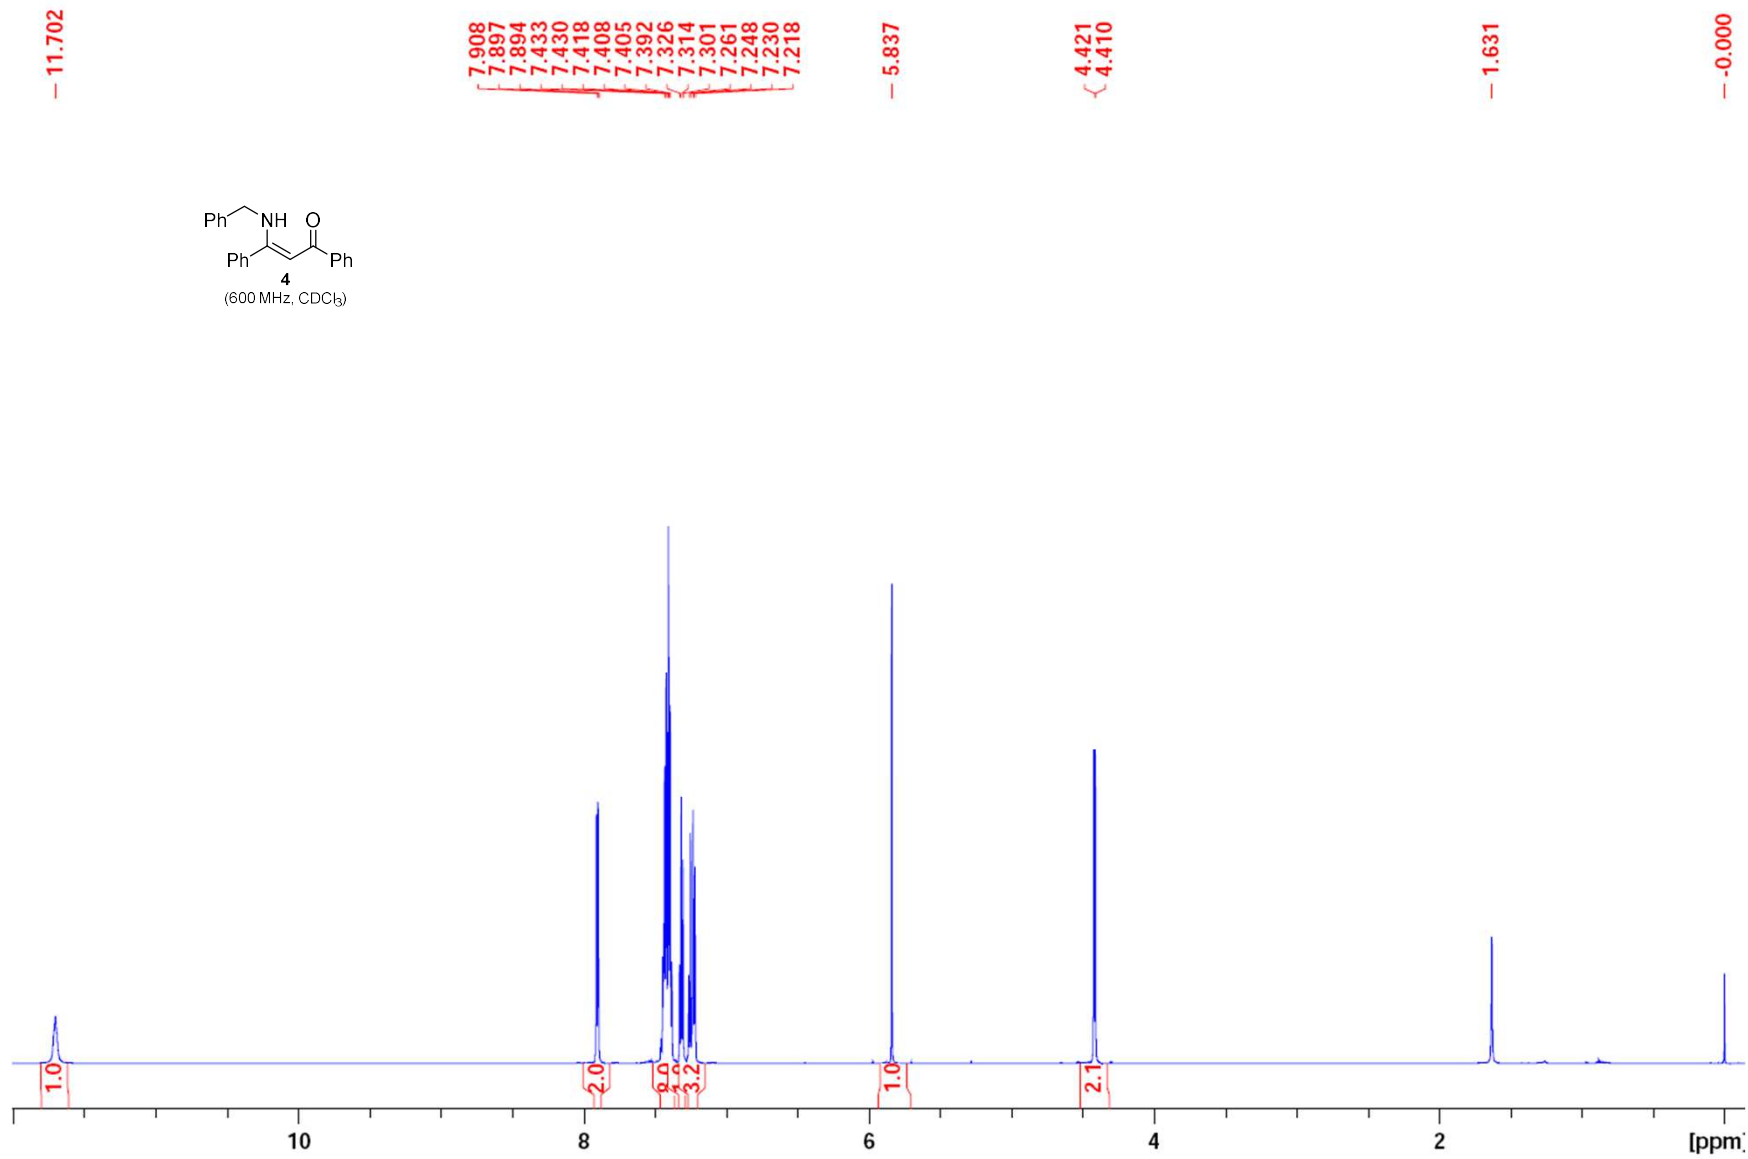

7.409  
7.405  
7.387  
7.311  
7.306  
7.303  
7.301  
7.293  
7.289  
7.278  
7.263  
7.252  
7.238  
7.226  
7.222  
7.210  
7.187  
7.183  
7.180  
7.159

3.796  
3.674  
3.553  
3.536  
3.494  
3.460  
3.442  
3.219  
3.203  
3.187  
3.170  
3.085  
3.066  
3.053  
2.977  
2.958  
2.944  
2.926

1.653  
1.492  
1.475  
1.458

-0.000

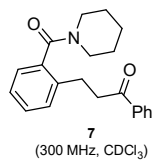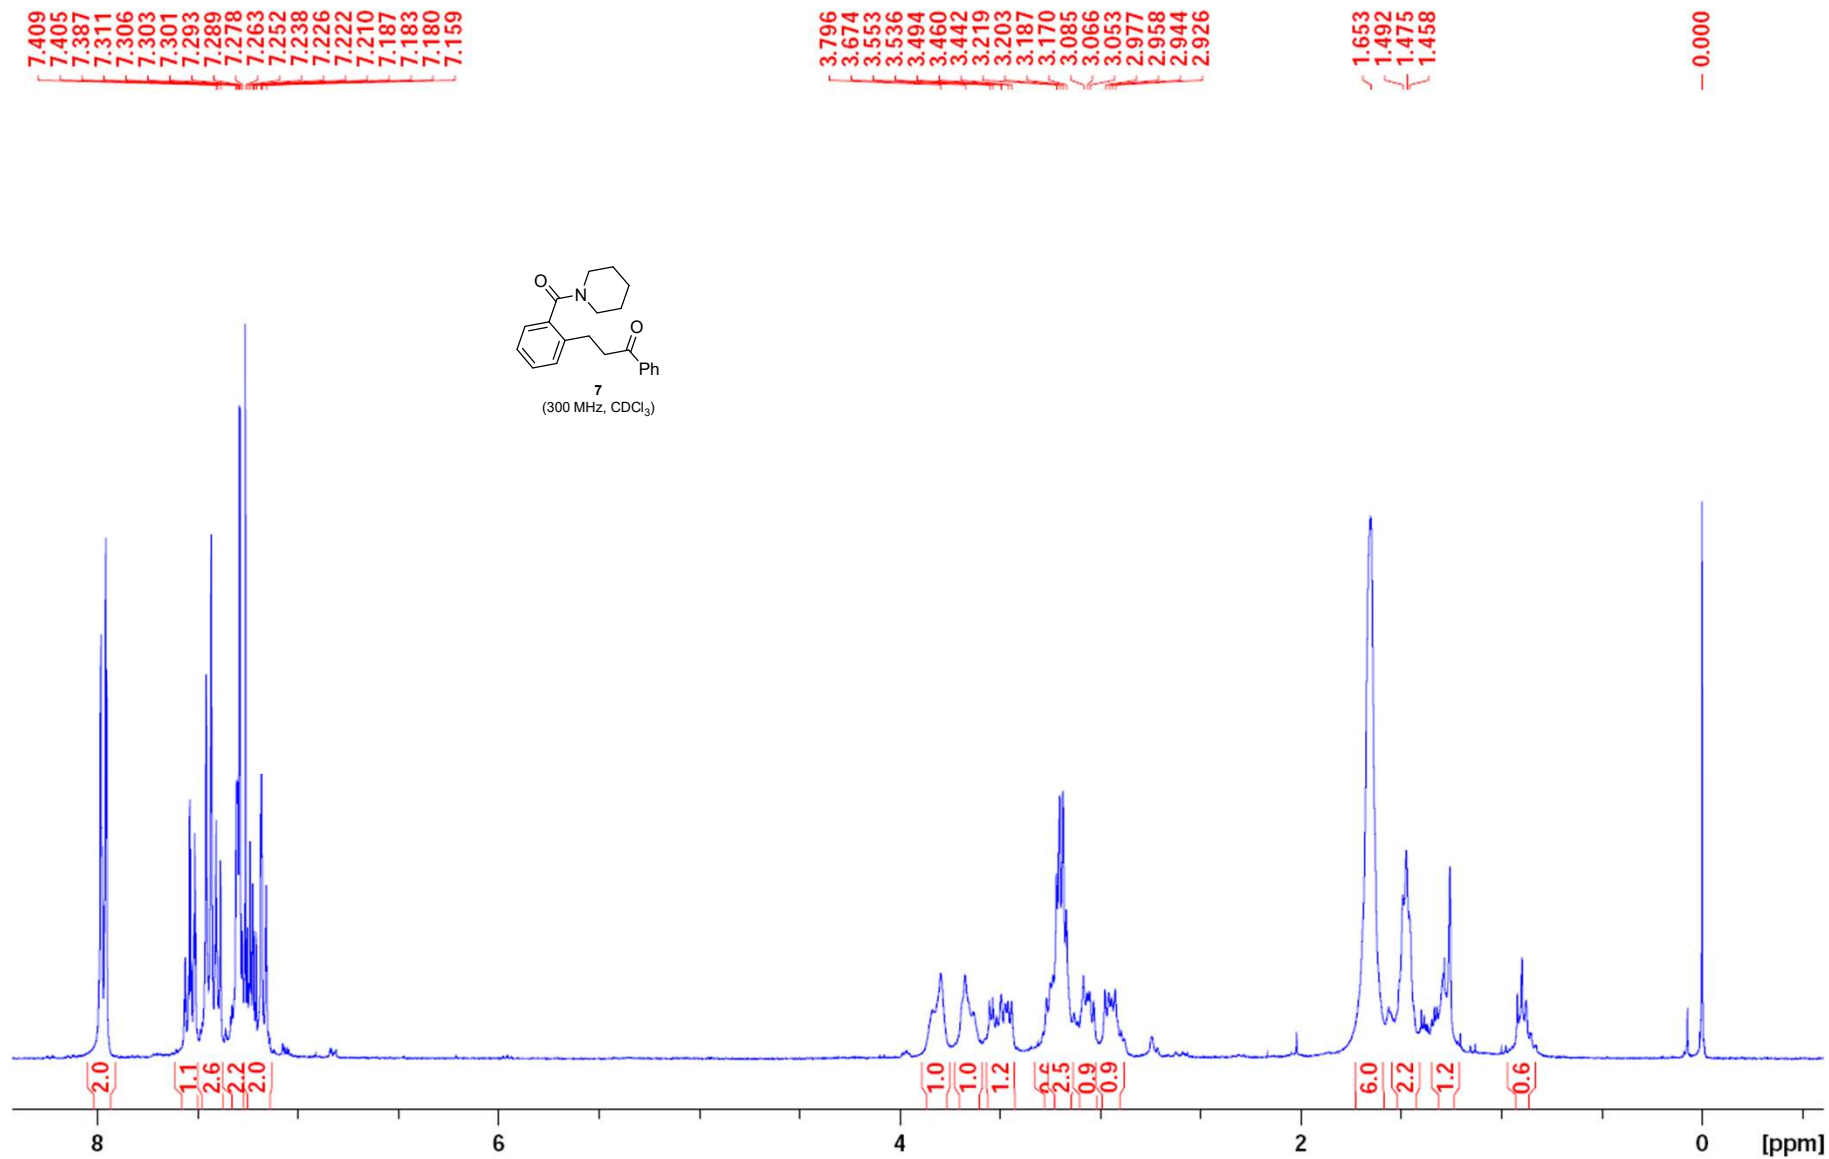

— 15.068

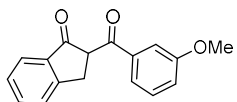

**6c**  
(600 MHz, CDCl<sub>3</sub>)

7.883  
7.870  
7.571  
7.559  
7.523  
7.510  
7.498  
7.476  
7.439  
7.427  
7.417  
7.404  
7.391  
7.059  
7.046

3.910  
3.877

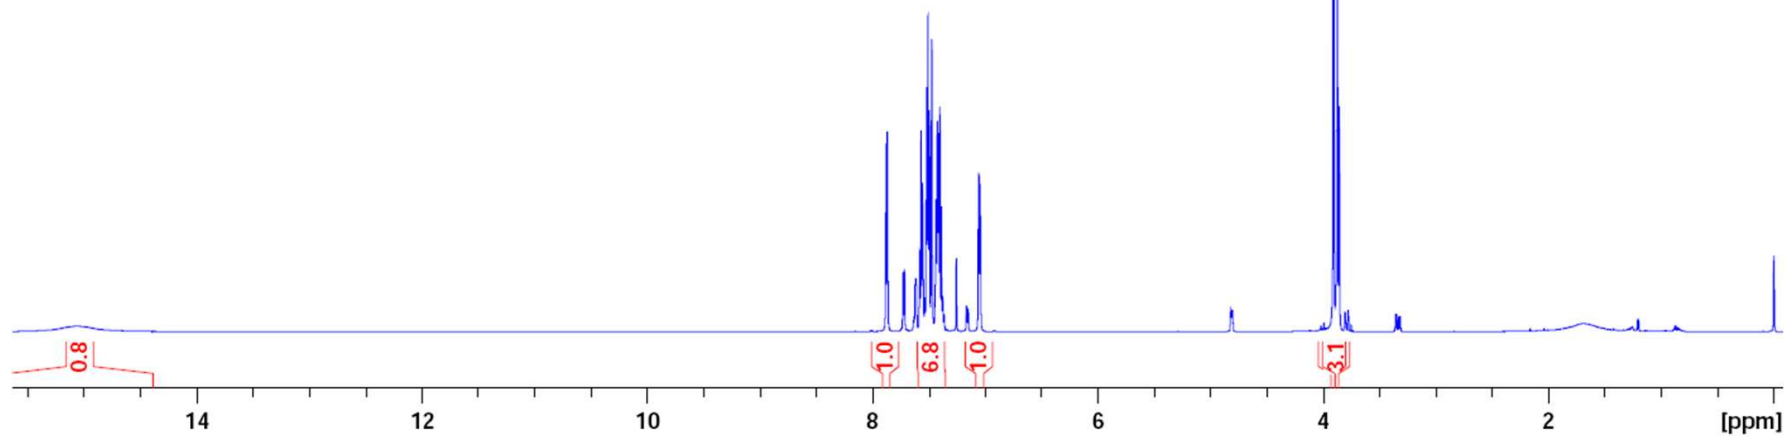

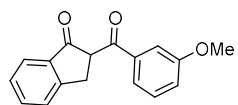

6c  
(150 MHz, CDCl<sub>3</sub>)

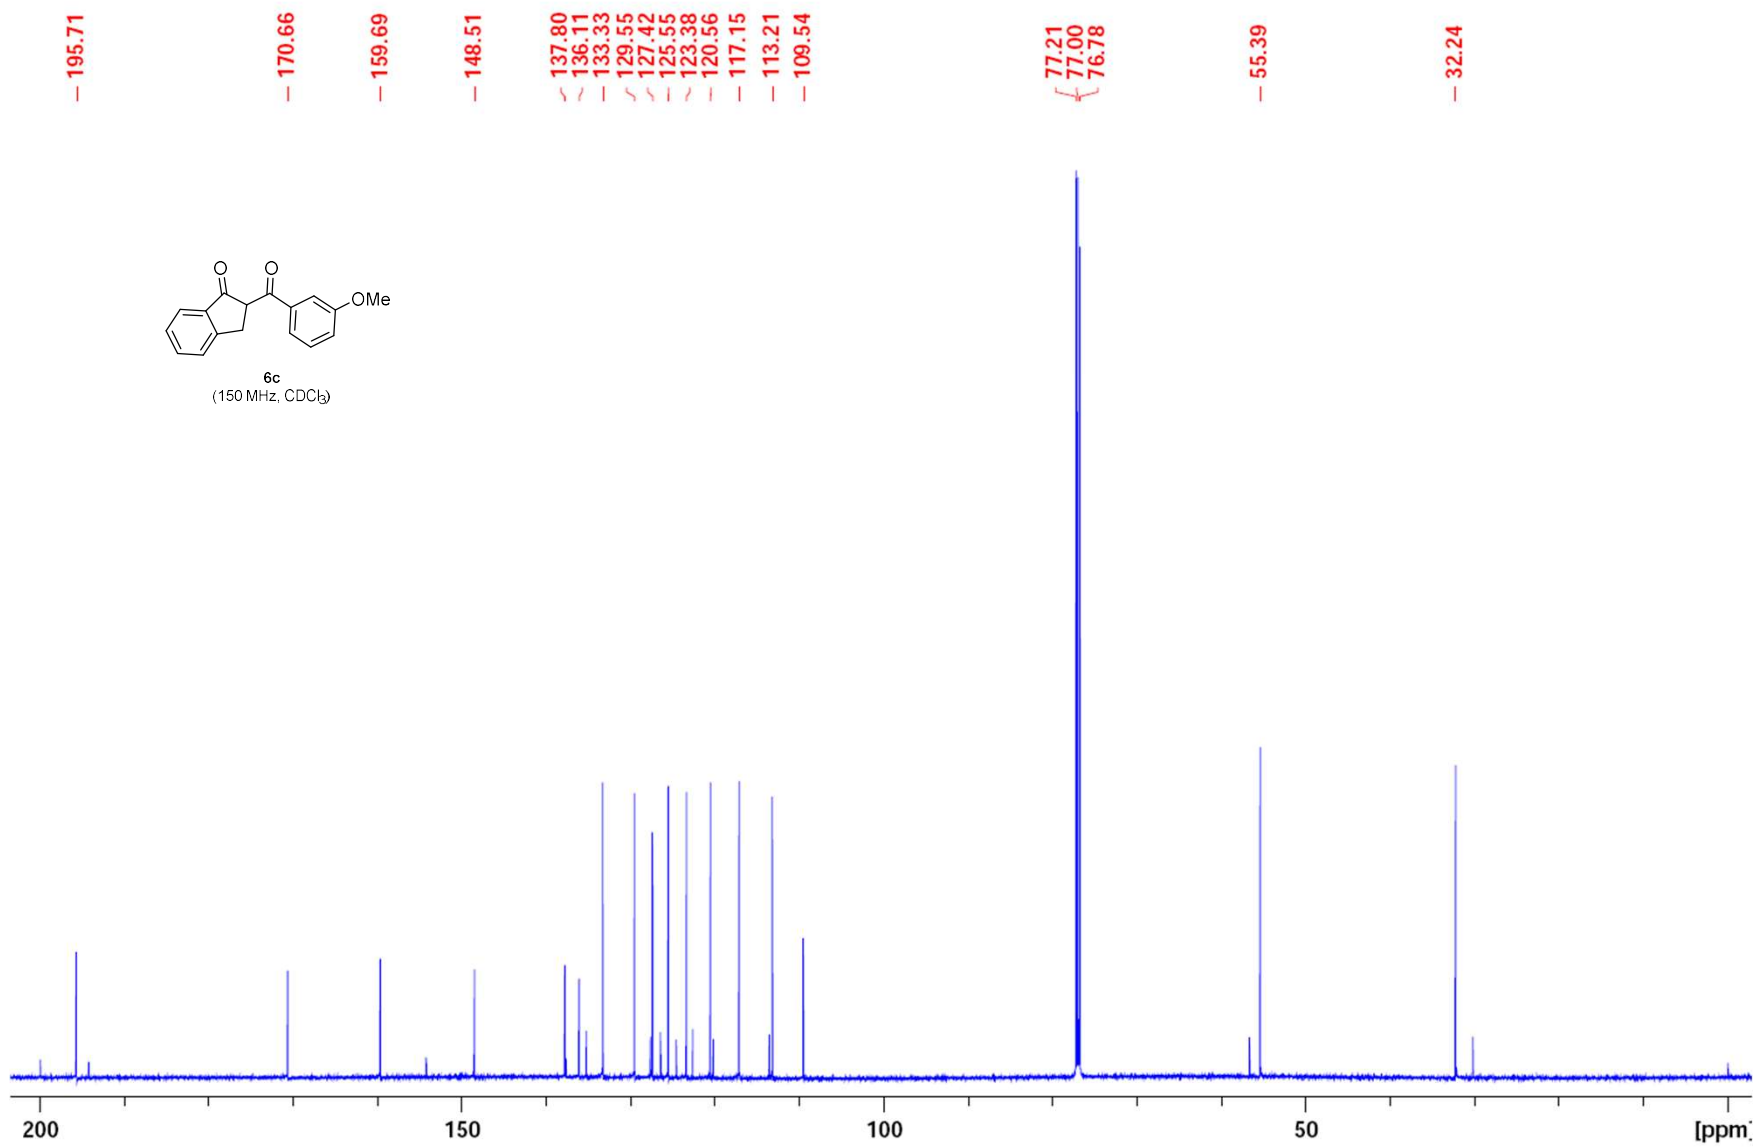



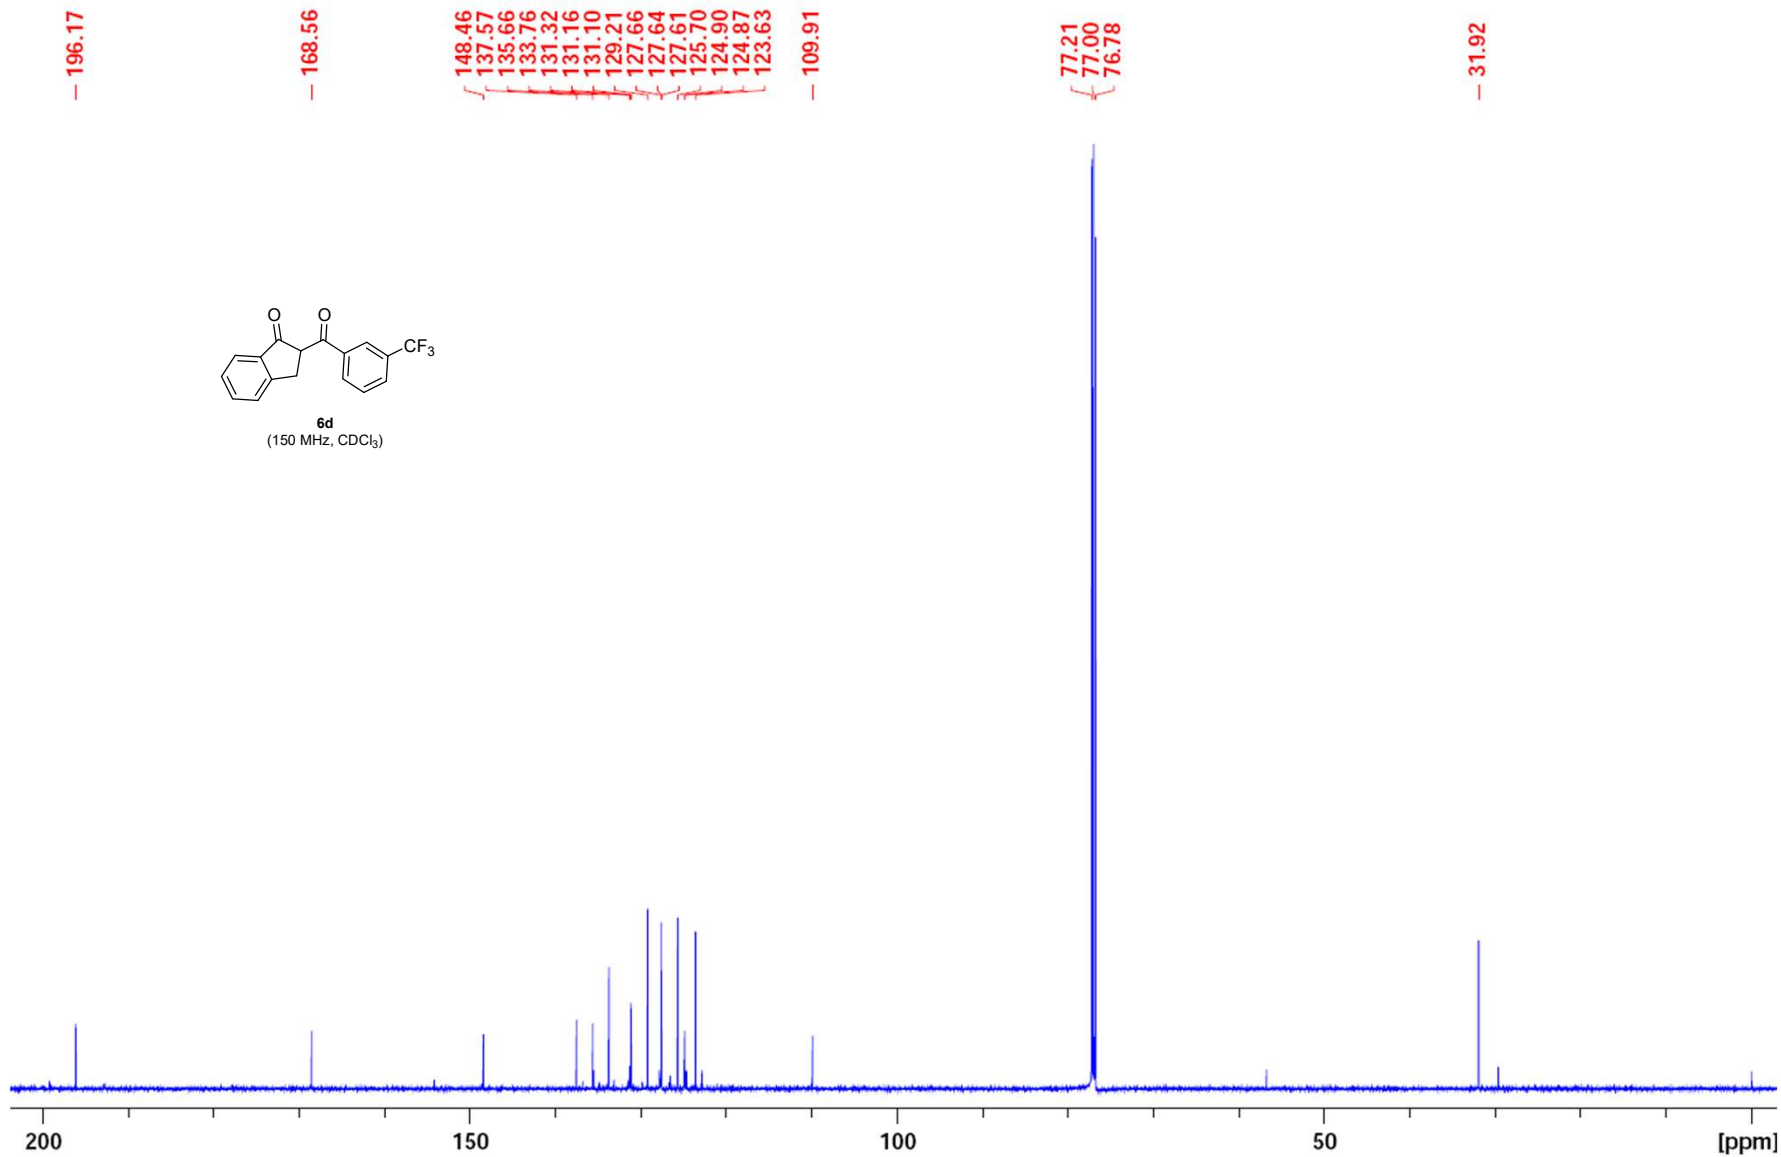

7.517  
7.506  
7.399  
7.388  
7.271

3.663  
3.652  
3.640  
3.433  
3.422  
3.411

1.973  
1.962  
1.950  
1.882  
1.871  
1.859

-0.000

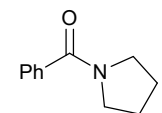

**3a**  
(600 MHz, CDCl<sub>3</sub>)

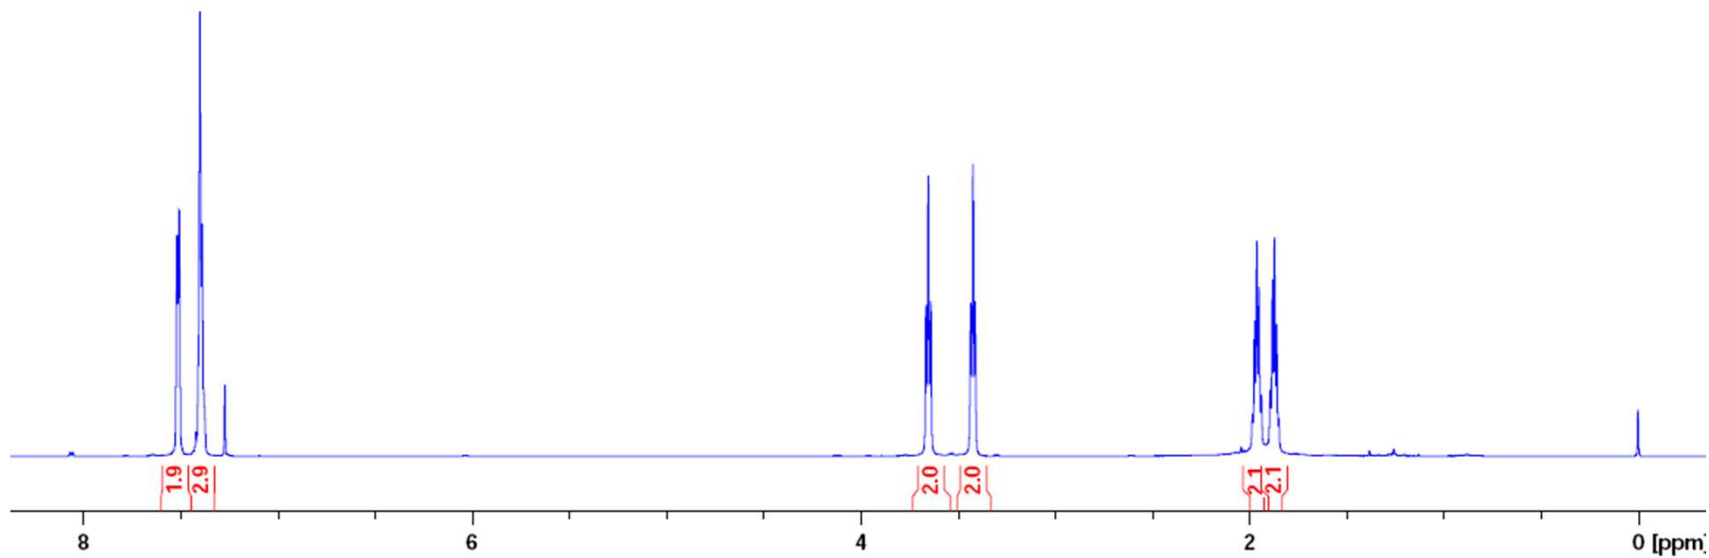

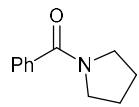

**3a**  
(150 MHz, CDCl<sub>3</sub>)

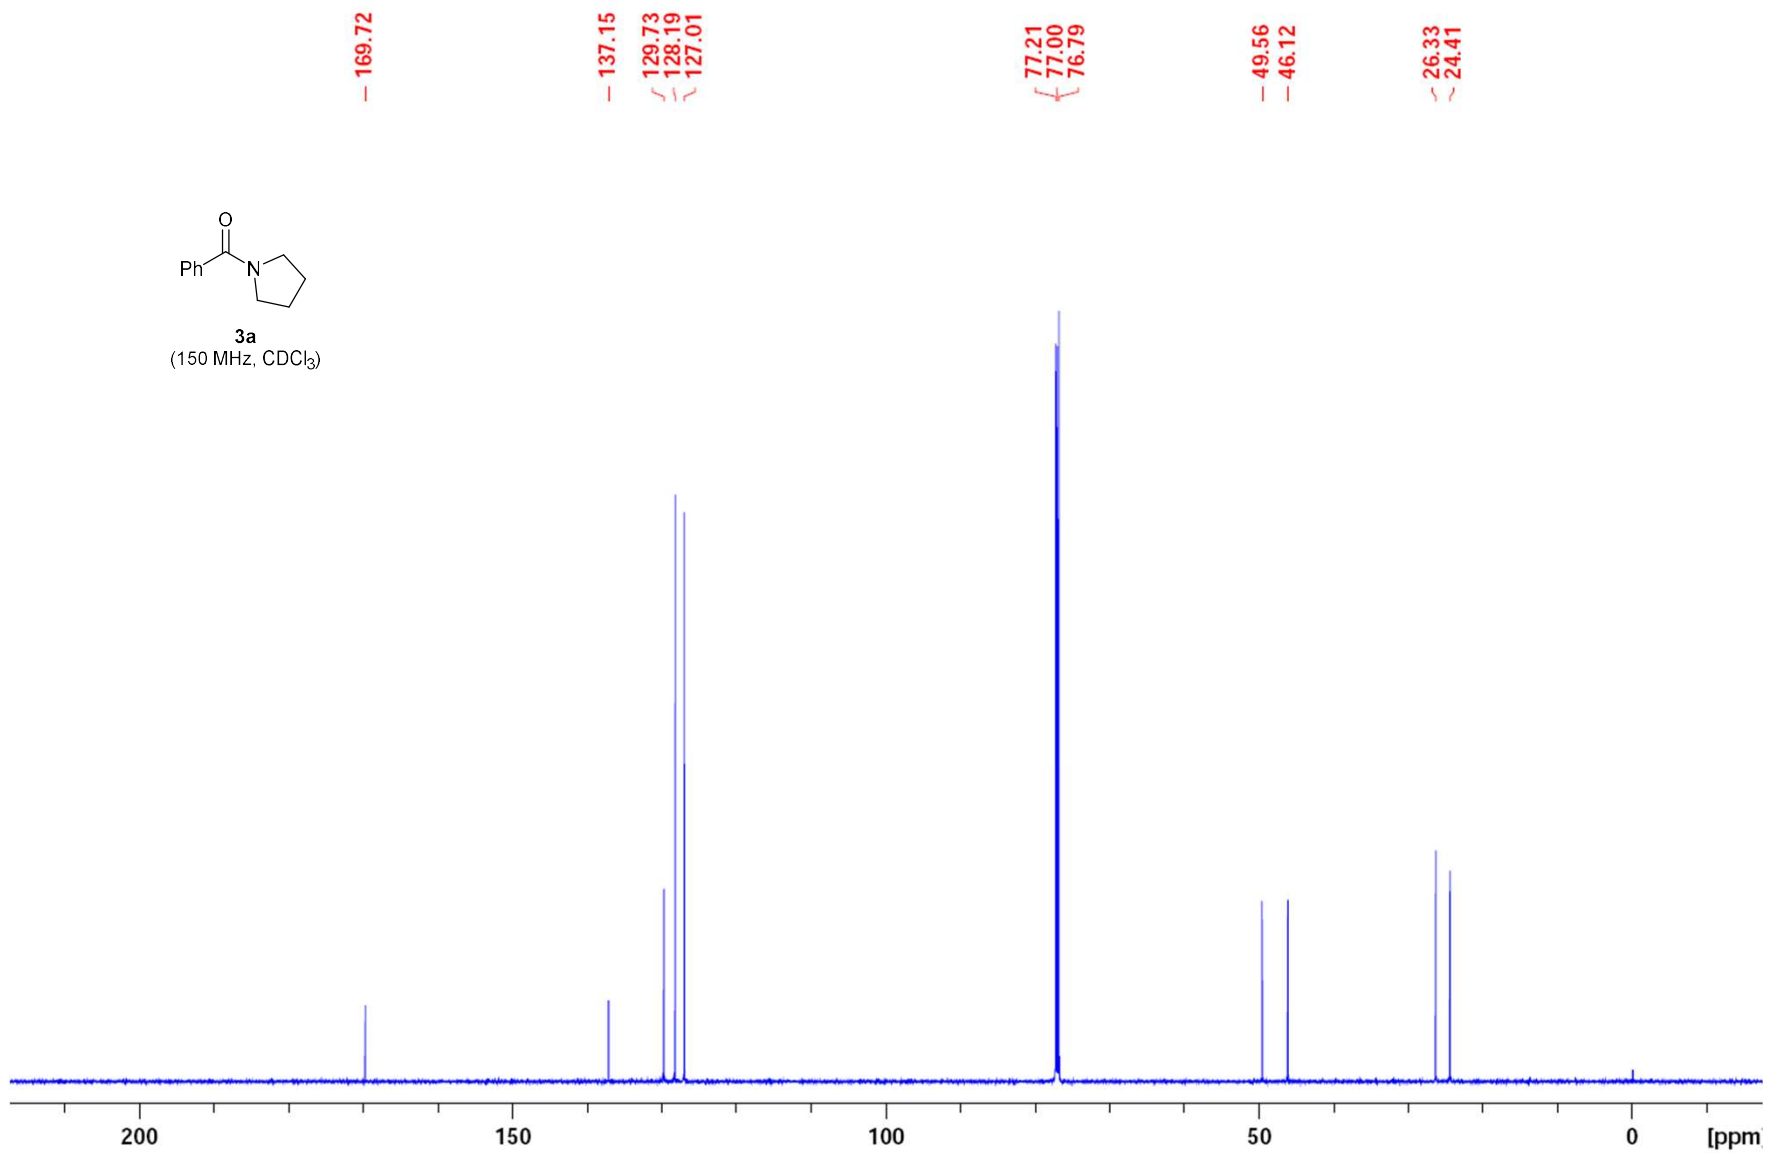

7.498  
7.486  
7.473  
7.421  
7.408  
7.396  
7.344  
7.337  
7.299  
7.292  
7.285  
7.278  
7.252

- 6.544

4.632  
4.623

-0.000

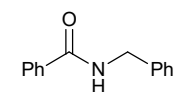

**3b**  
(600 MHz, CDCl<sub>3</sub>)

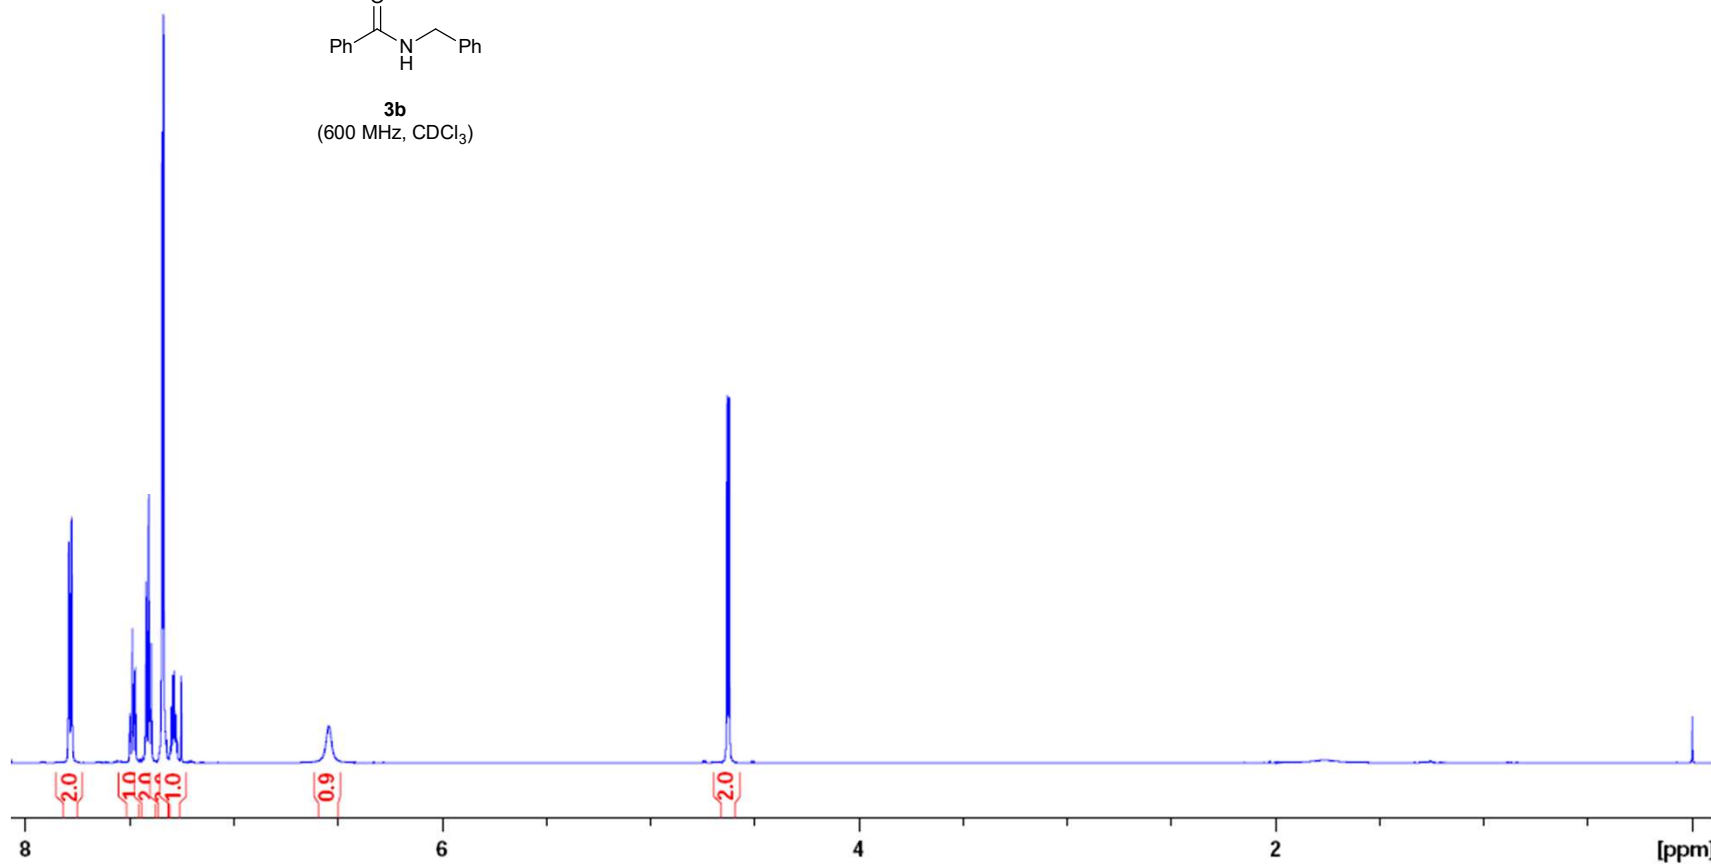

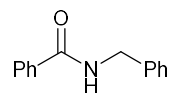

**3b**  
(150 MHz, CDCl<sub>3</sub>)

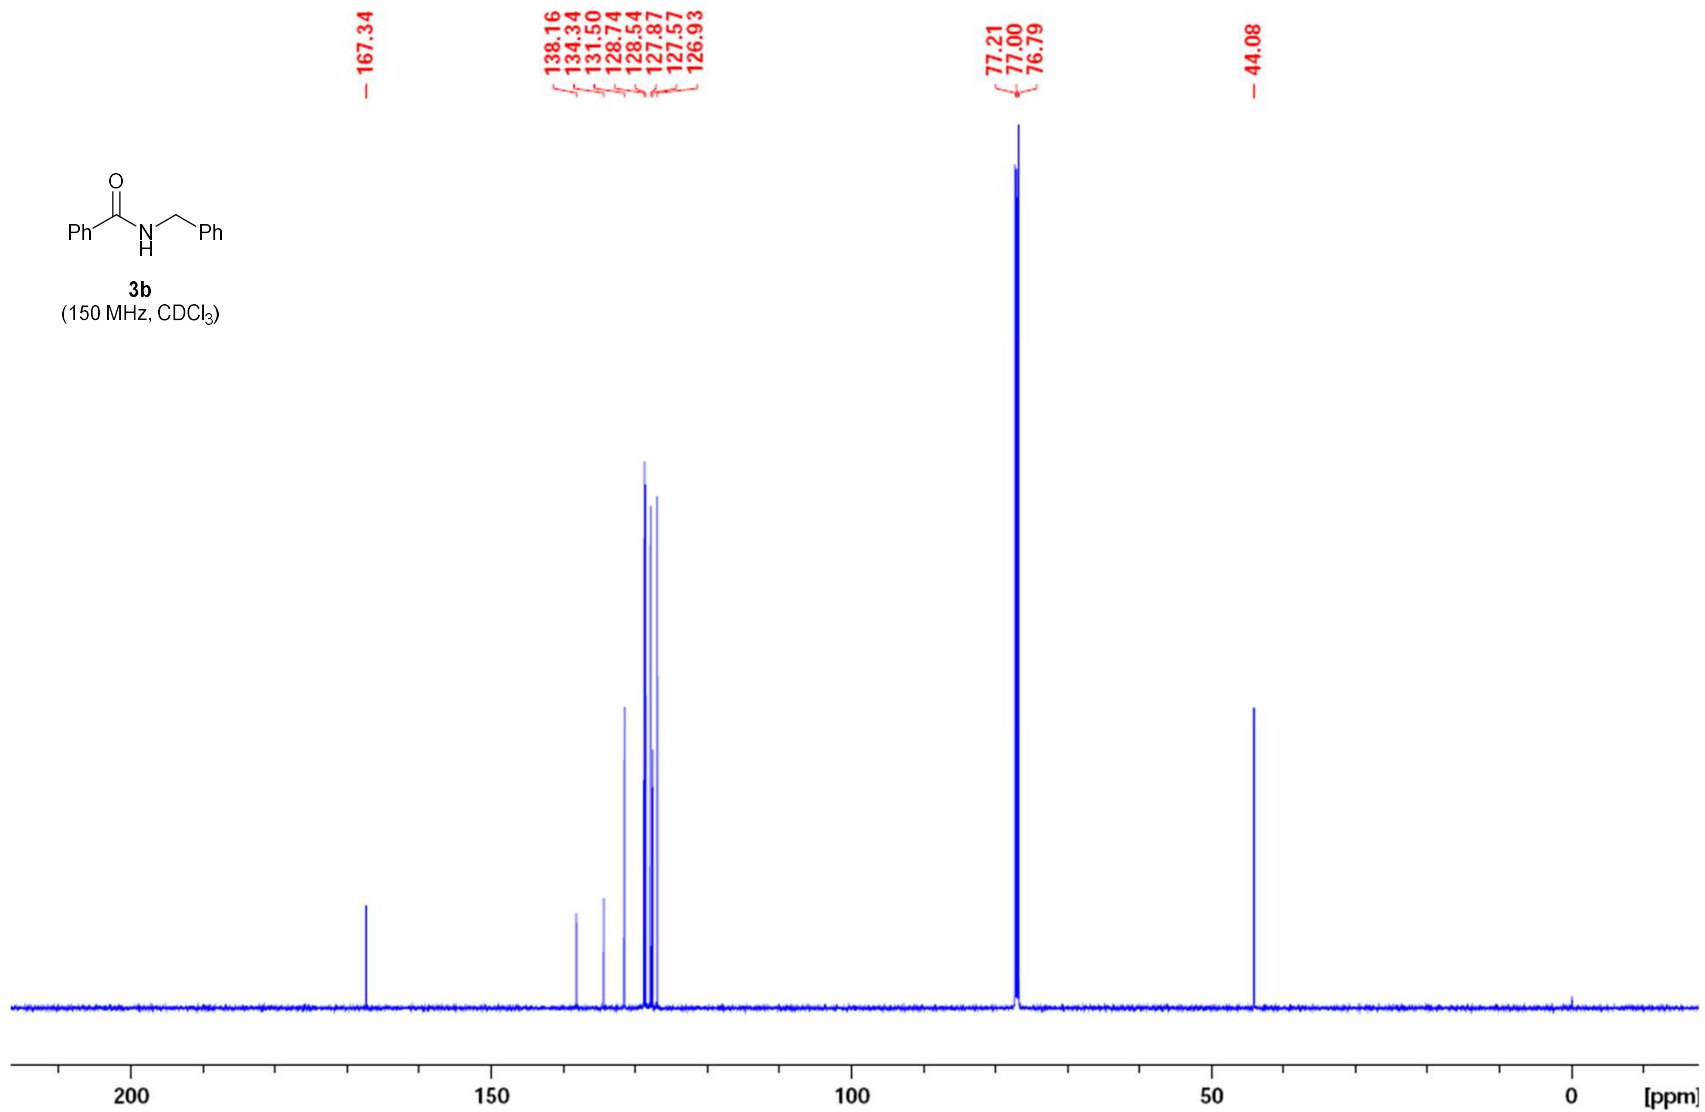

7.764  
7.751  
7.495  
7.482  
7.470  
7.429  
7.417  
7.404  
7.267

6.233

3.458  
3.447  
3.435  
3.425

1.619  
1.607  
1.595  
1.389  
1.377  
1.365  
1.322  
1.313  
0.902  
0.892  
0.881

-0.000

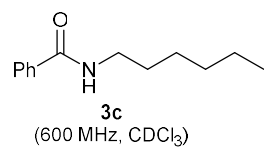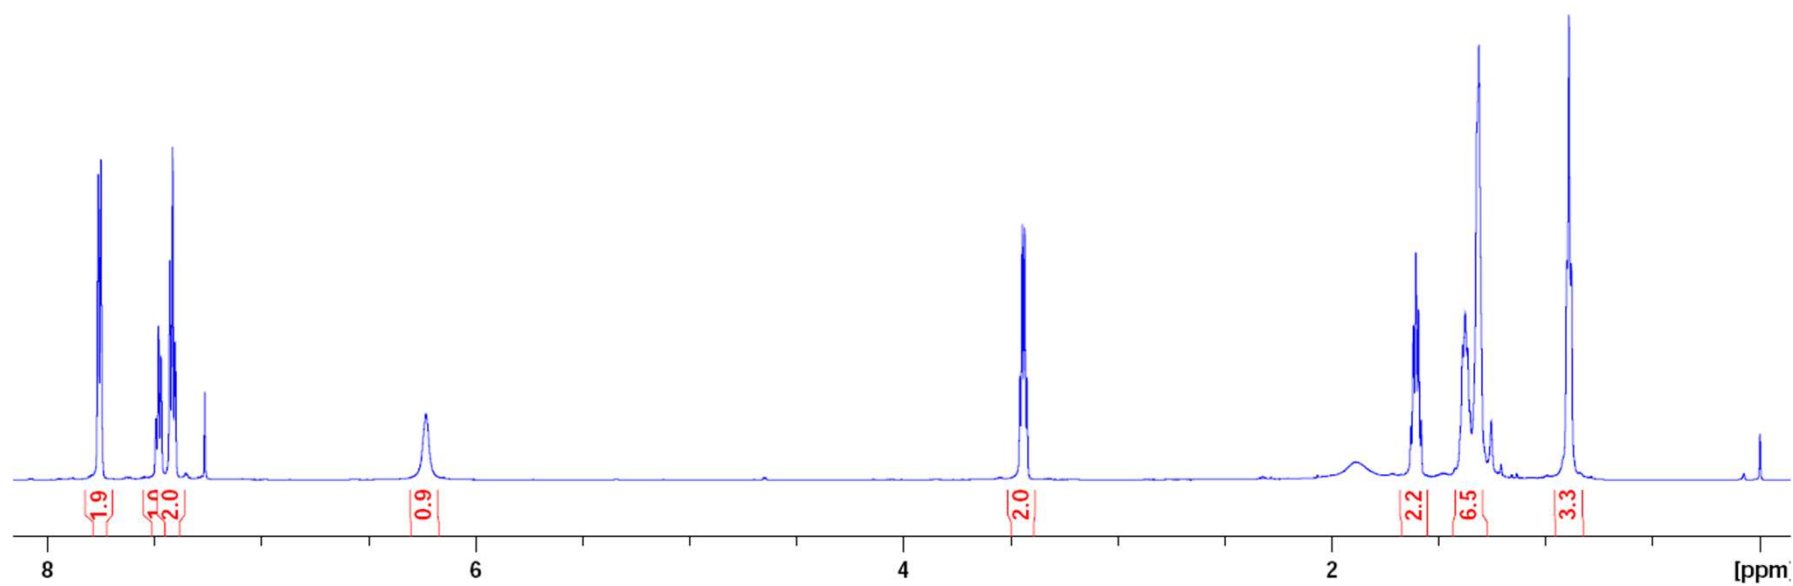

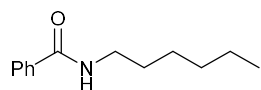

**3c**  
(150 MHz, CDCl<sub>3</sub>)

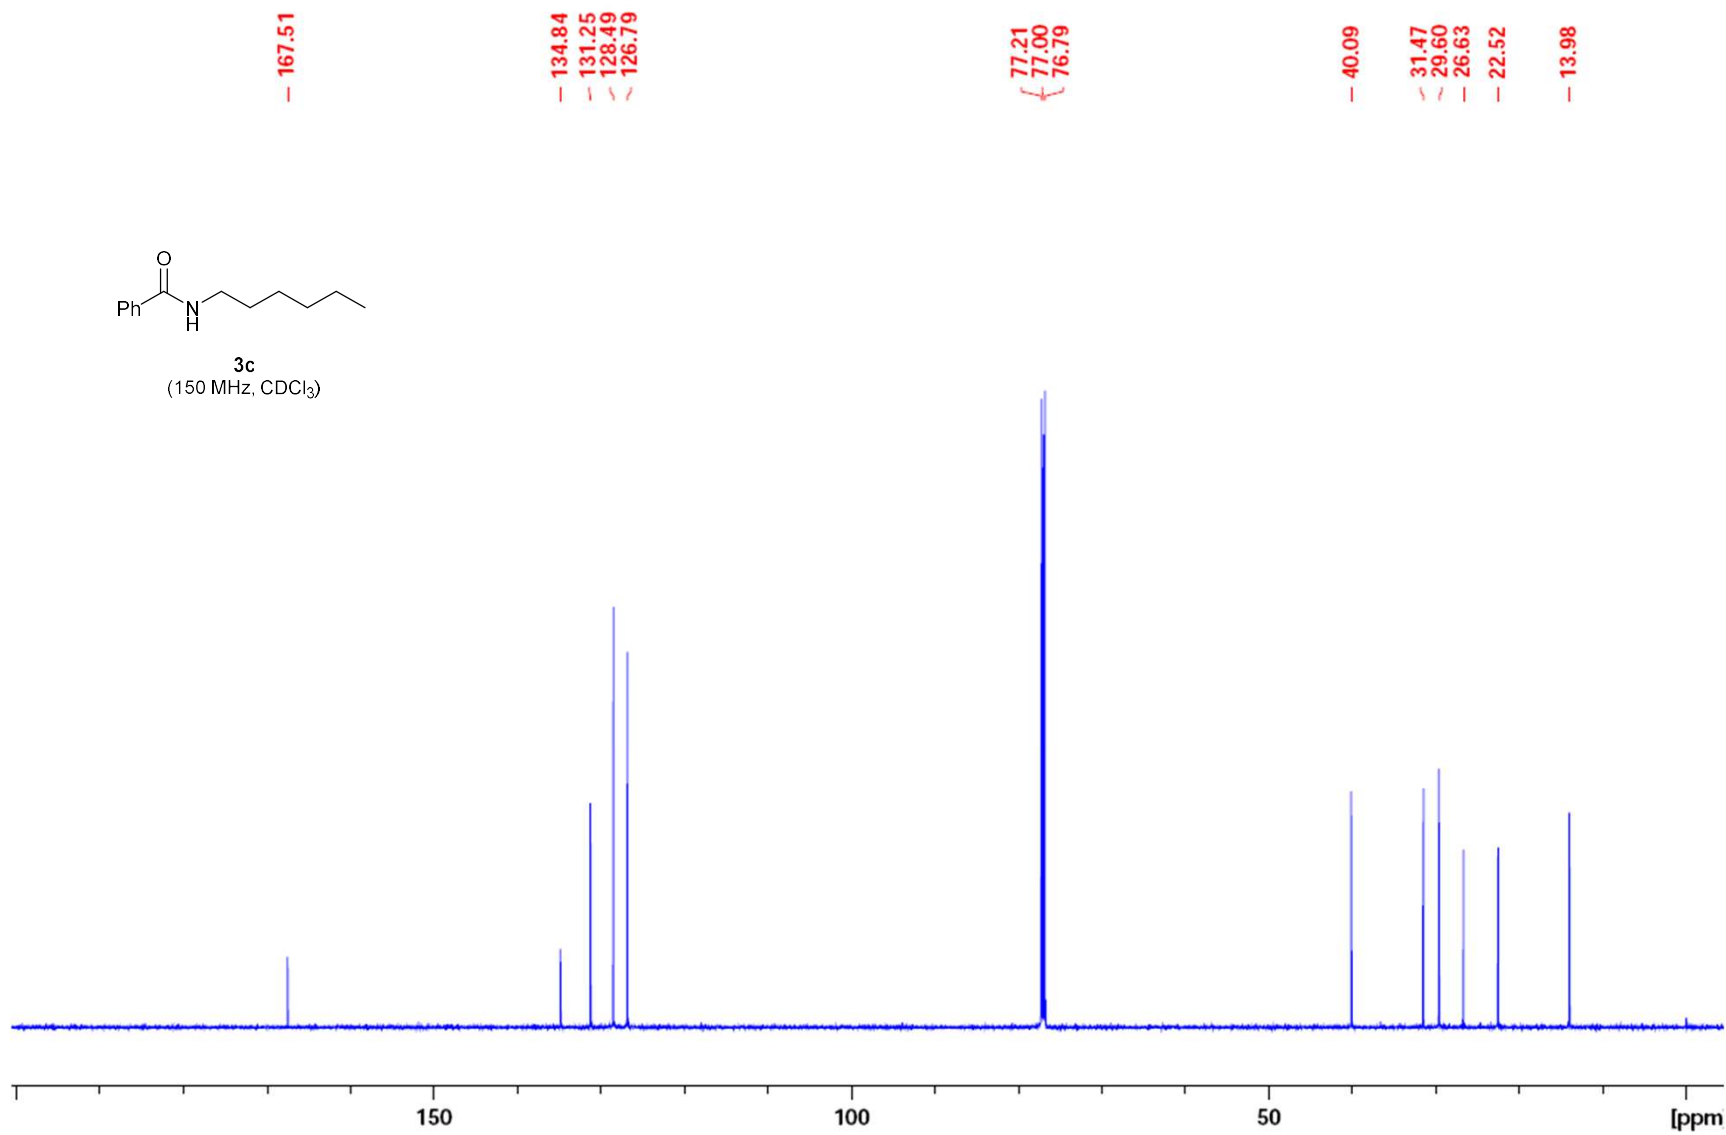

7.684  
7.484  
7.472  
7.459  
7.406  
7.393  
7.381  
7.335  
7.323  
7.310  
7.255  
7.243  
7.239  
7.226

— 6.268

3.726  
3.714  
3.704  
3.693

2.940  
2.929  
2.917

— 0.000

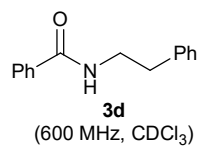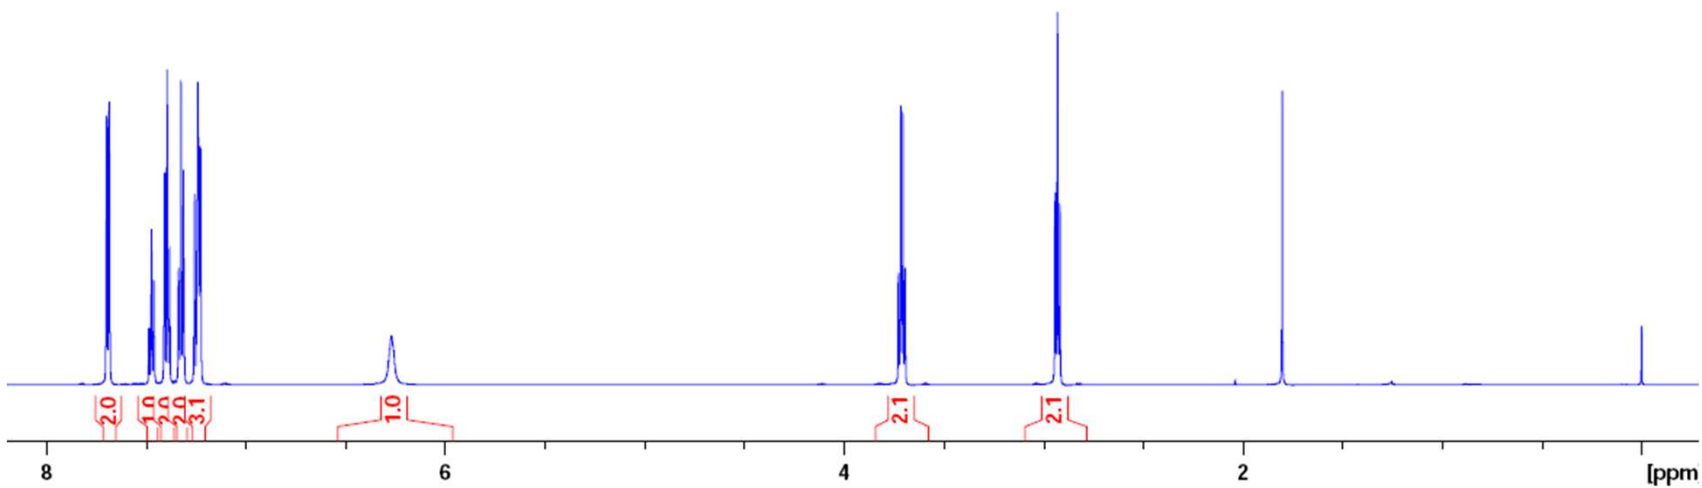

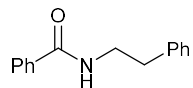

**3d**  
(150 MHz, CDCl<sub>3</sub>)

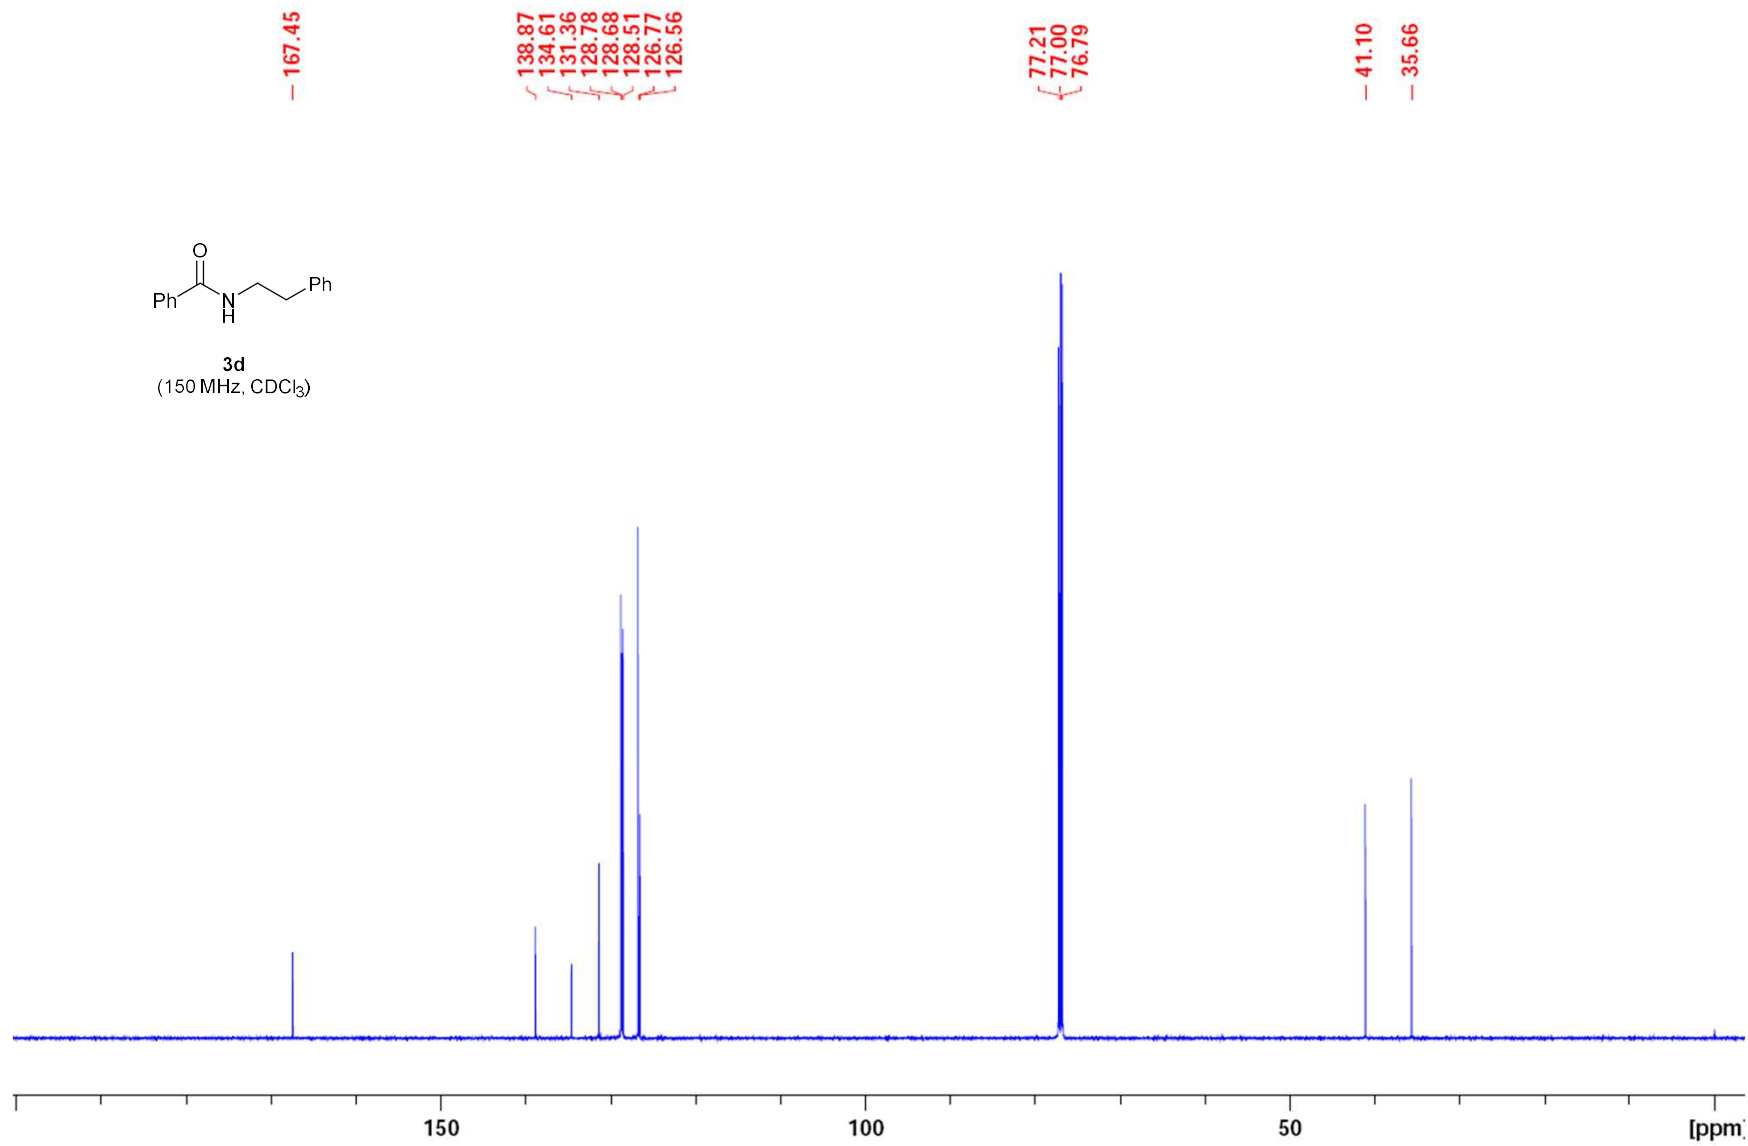

7.759  
7.747  
7.473  
7.460  
7.448  
7.379  
7.366  
7.354  
7.272  
7.129

- 4.314

3.771  
3.763  
3.754  
3.573  
3.564  
3.555  
3.546

- -0.000

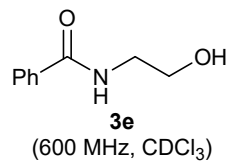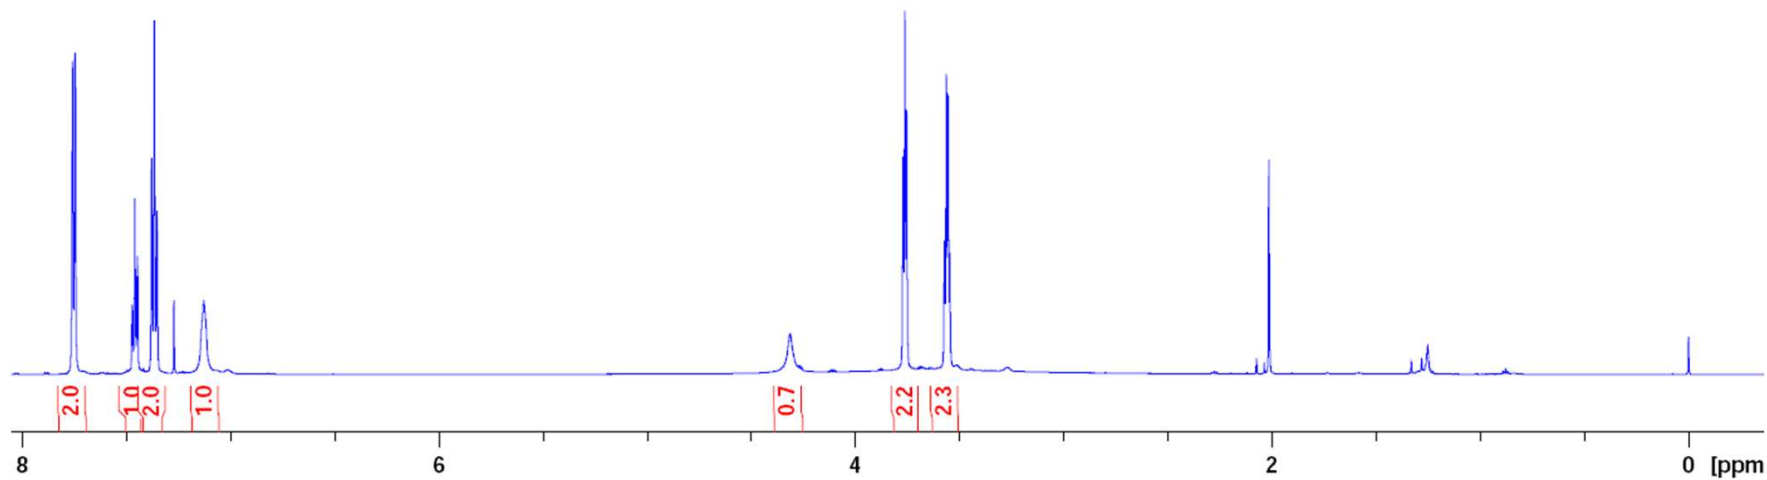

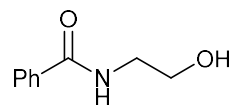

**3e**  
(150 MHz, CDCl<sub>3</sub>)

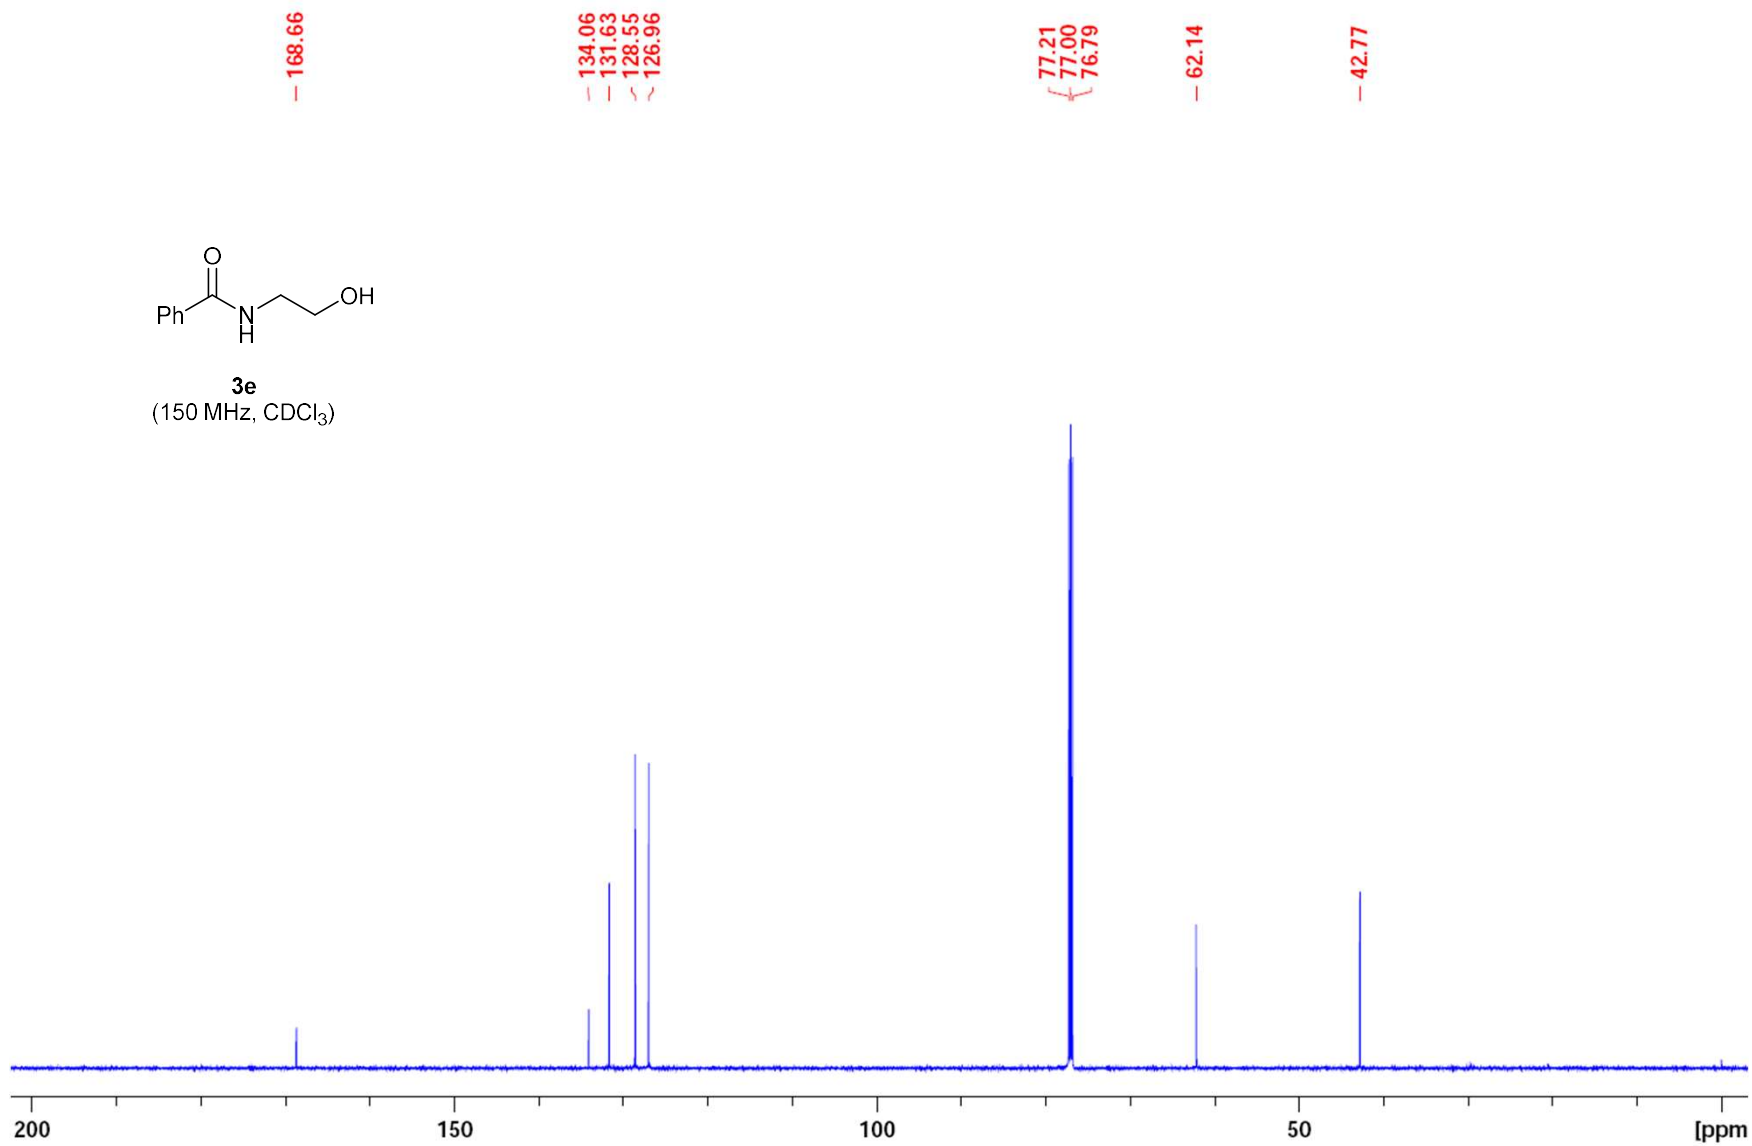

7.756  
7.743  
7.488  
7.476  
7.464  
7.425  
7.413  
7.400  
7.265

- 6.025

3.984  
3.977  
3.971

2.037  
2.020  
1.763  
1.740  
1.663  
1.642  
1.455  
1.435  
1.414  
1.393  
1.271  
1.267  
1.251  
1.232  
1.214  
1.194

- 0.000

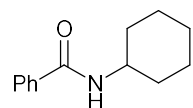

**3f**  
(600 MHz, CDCl<sub>3</sub>)

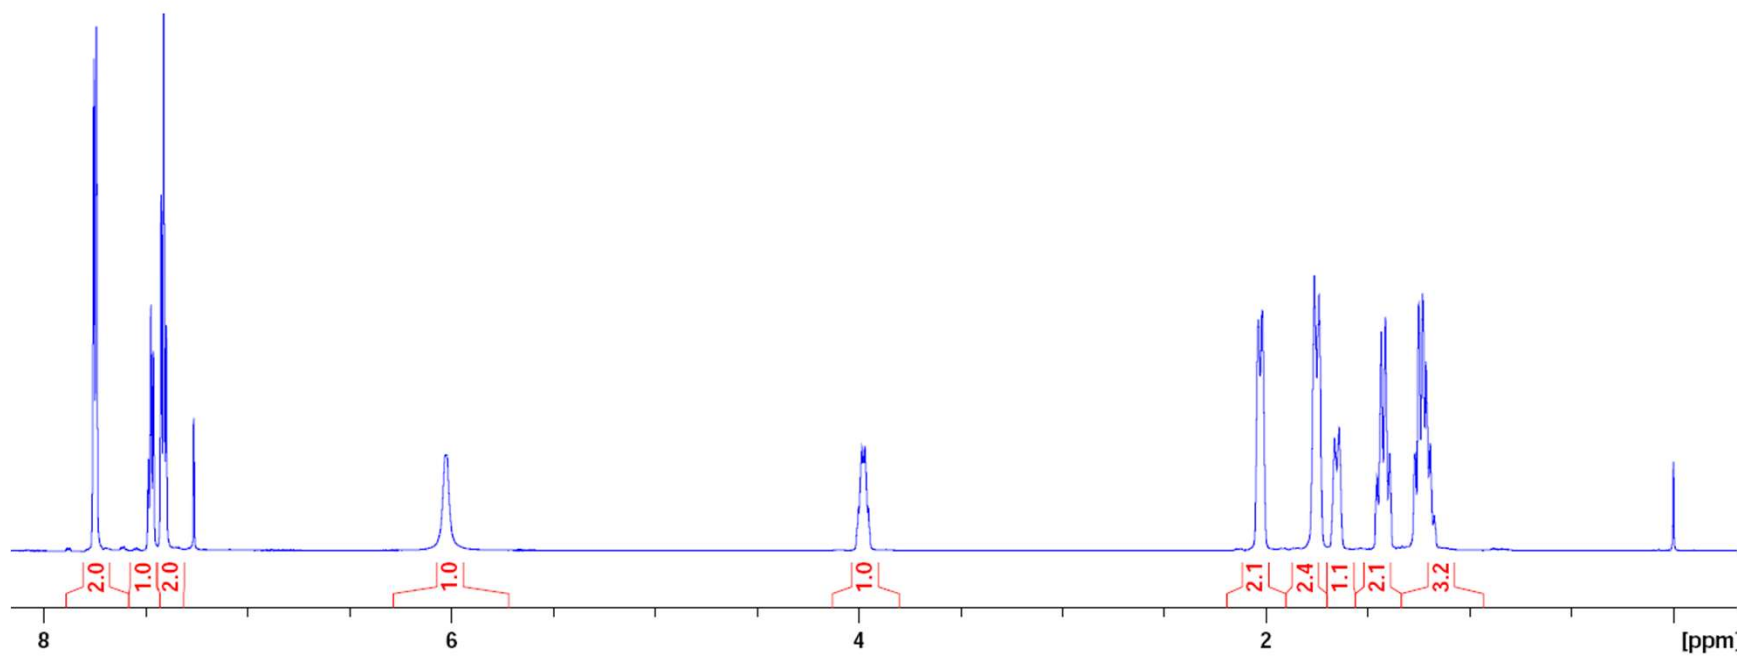

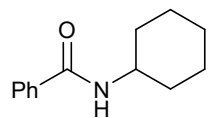

**3f**  
(150 MHz, CDCl<sub>3</sub>)

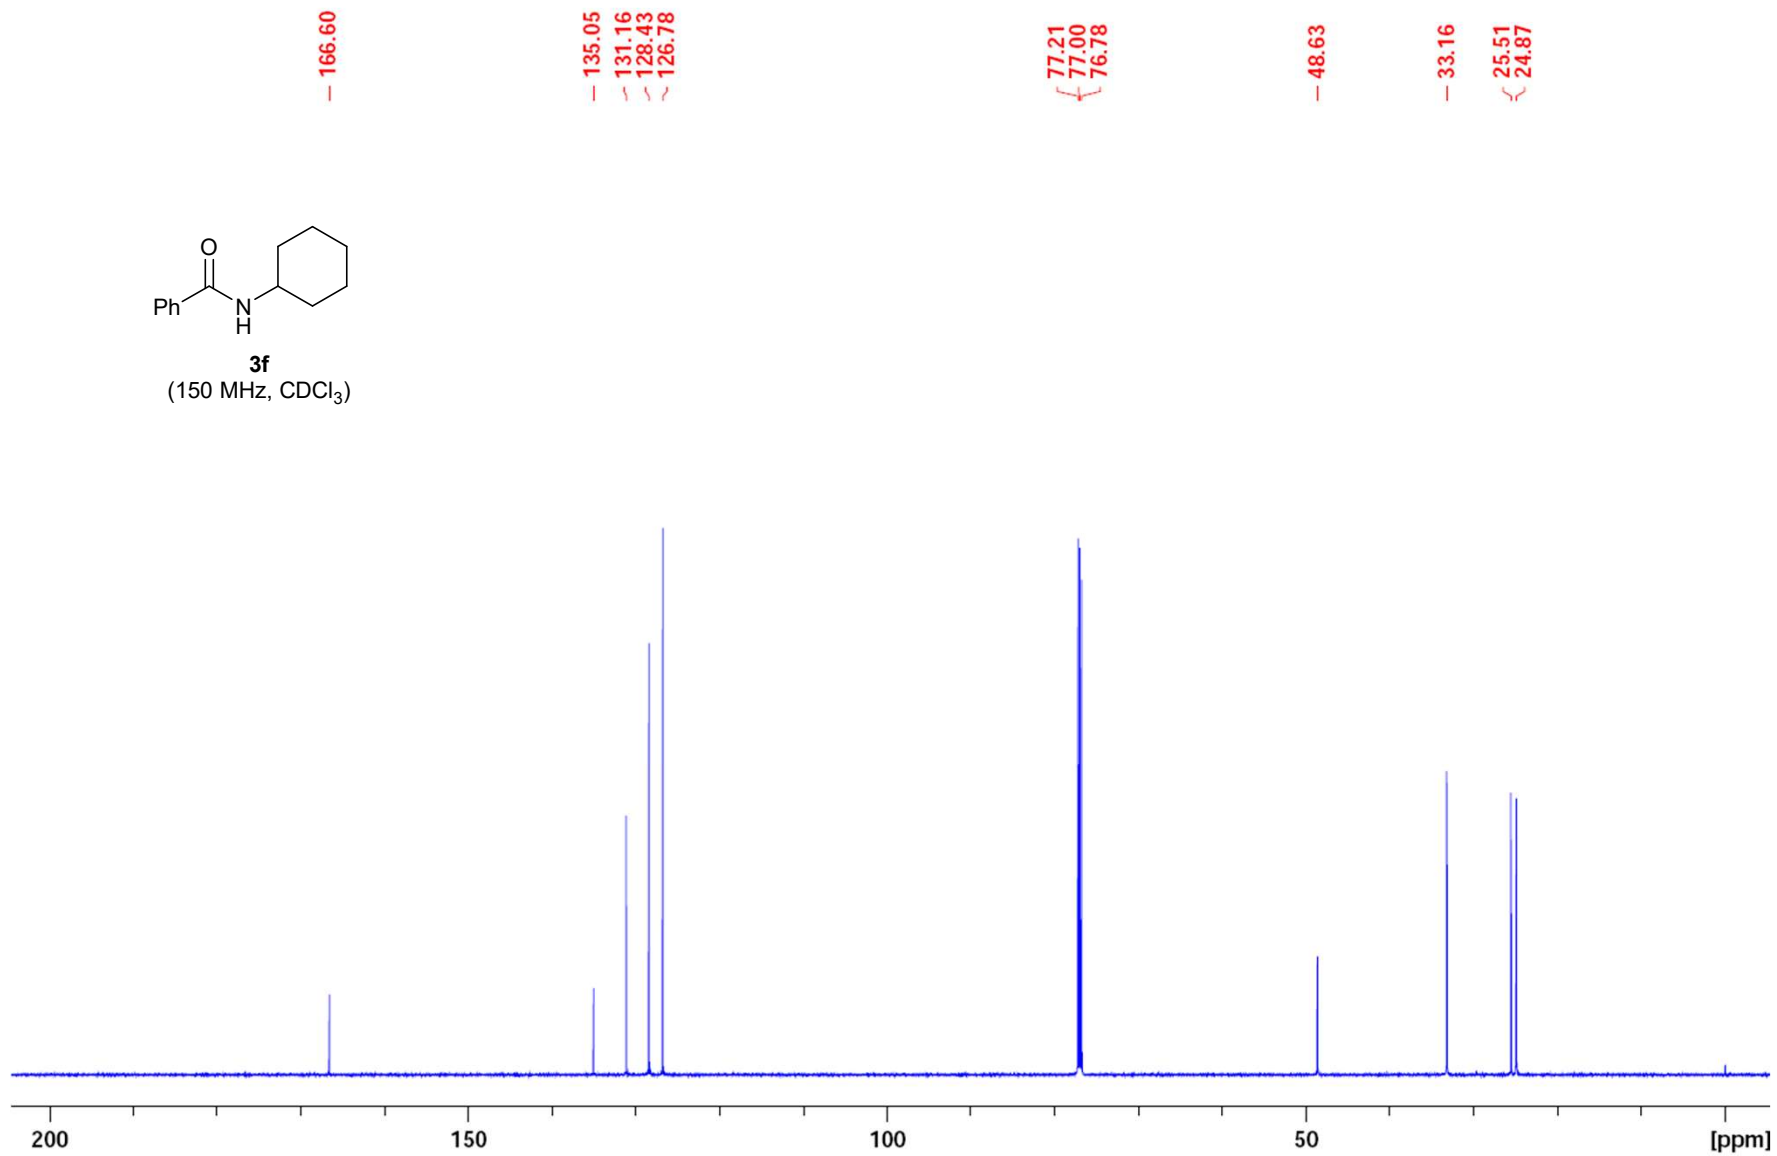

7.869  
7.856  
7.648  
7.635  
7.541  
7.529  
7.485  
7.472  
7.460  
7.377  
7.364  
7.351  
7.255  
7.163  
7.150

-0.000

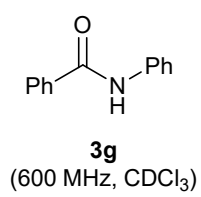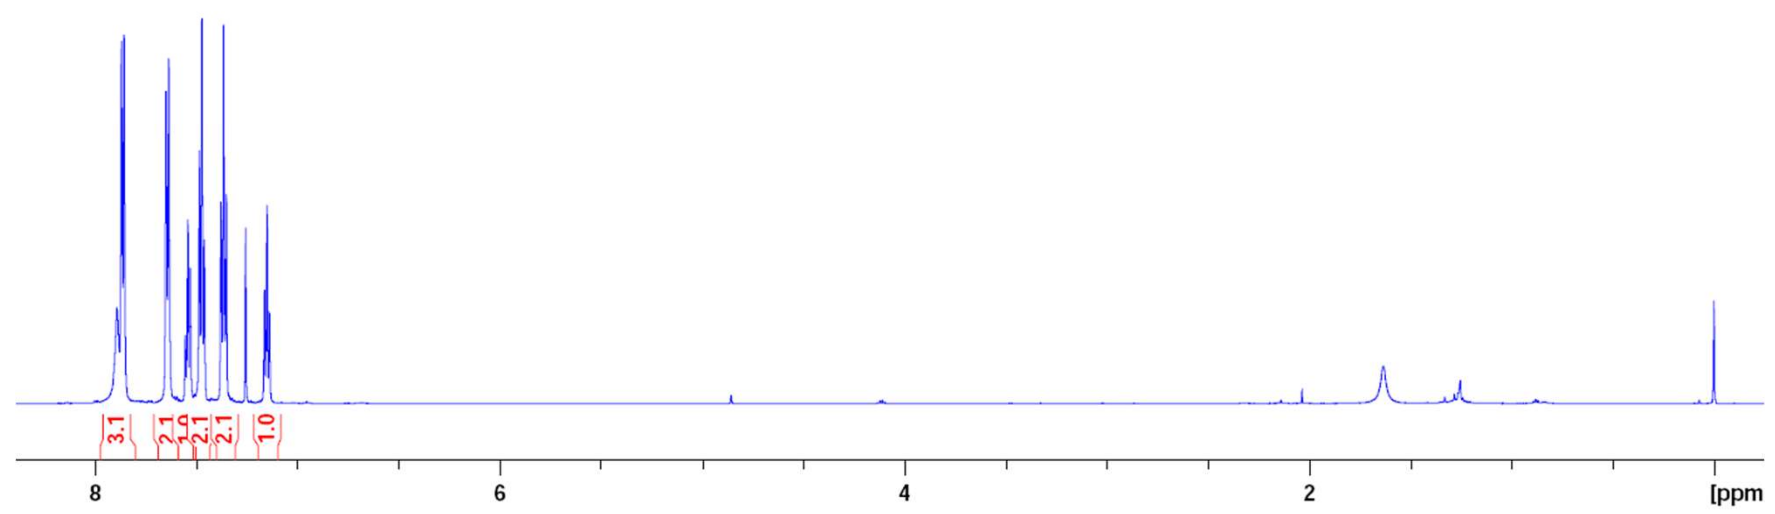

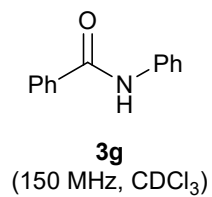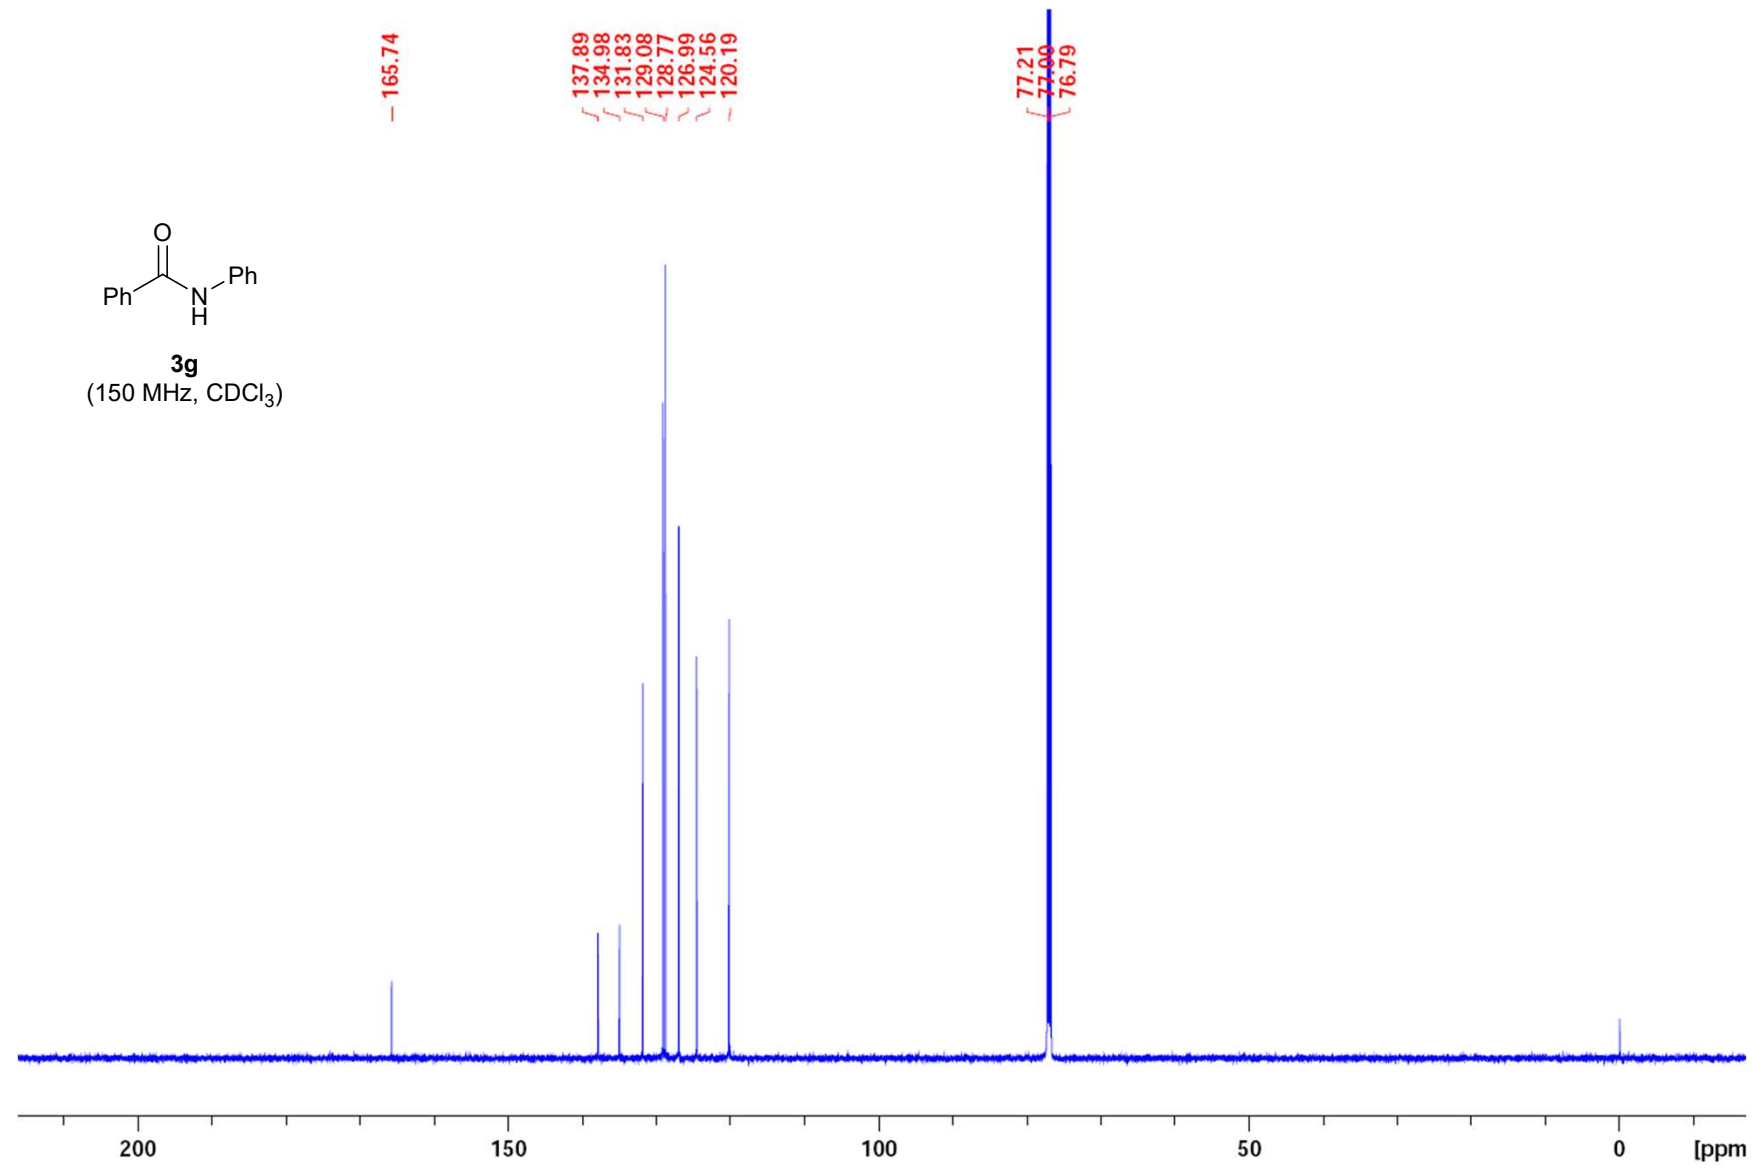

9.095  
8.420  
8.406  
8.208  
7.951  
7.939  
7.771  
7.758  
7.746  
7.573  
7.561  
7.549  
7.499  
7.487  
7.475  
7.266  
7.064  
7.053  
7.046

-0.000

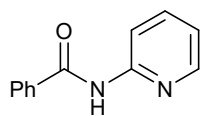

**3h**  
(600 MHz, CDCl<sub>3</sub>)

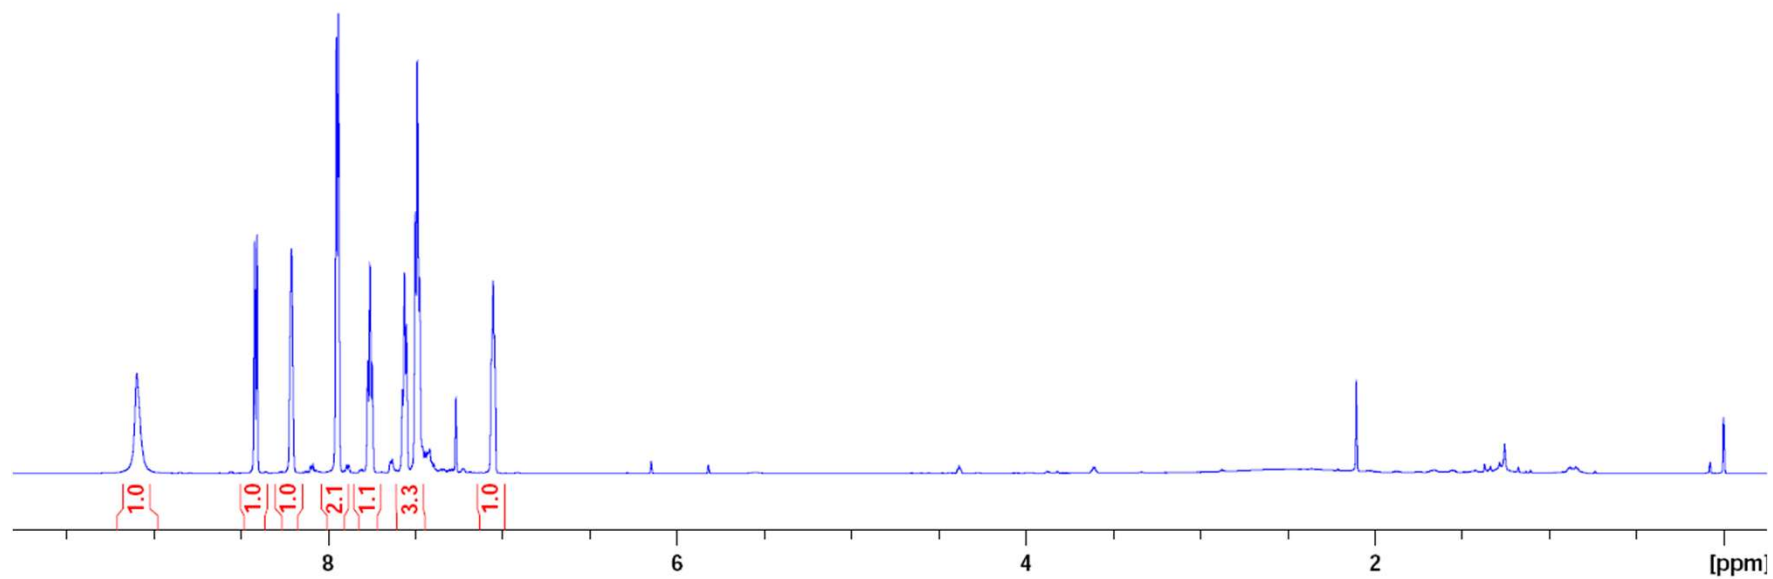

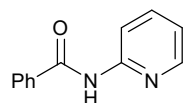

**3h**  
(150 MHz, CDCl<sub>3</sub>)

— 165.85

— 151.62

— 147.79

— 138.46

— 134.28

— 132.17

— 128.76

— 127.23

— 119.86

— 114.24

{ 77.21  
77.00  
76.79 }

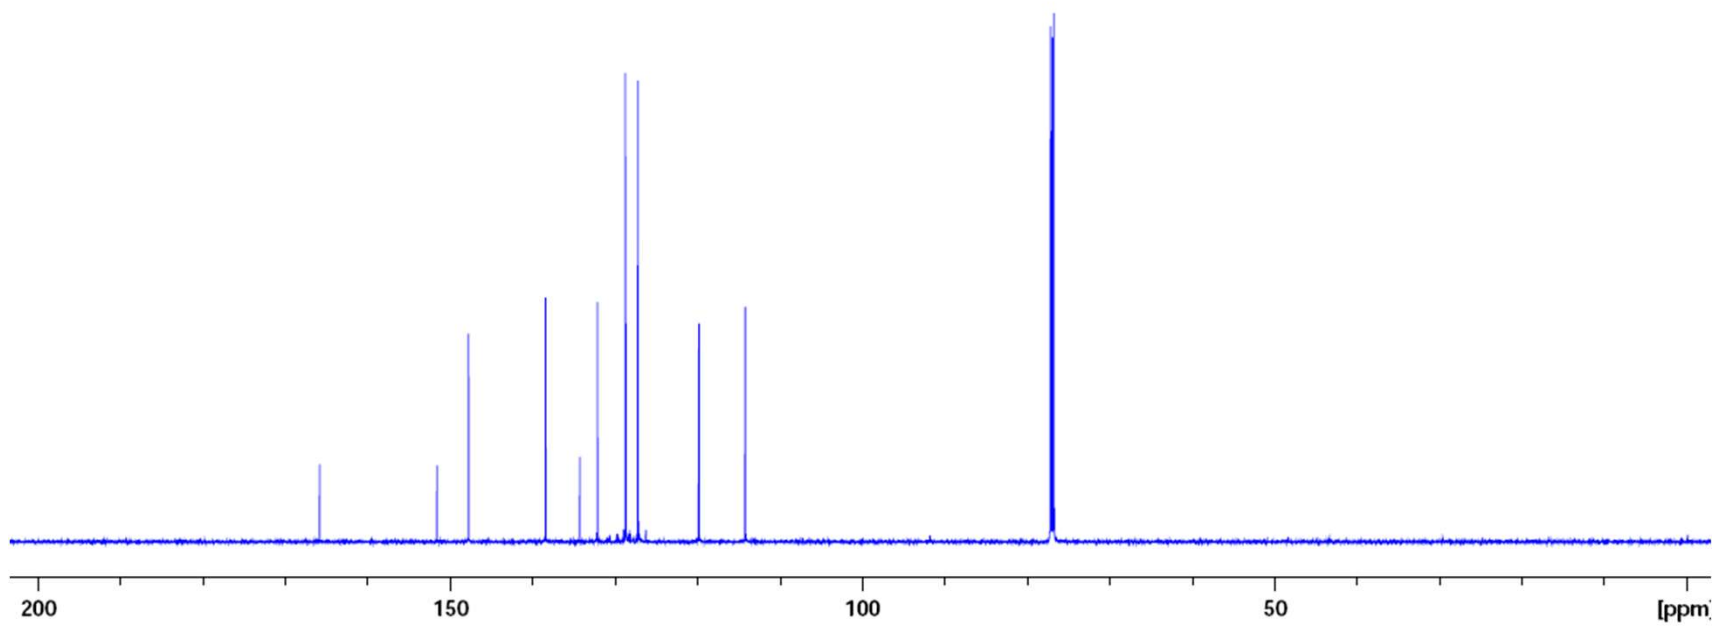

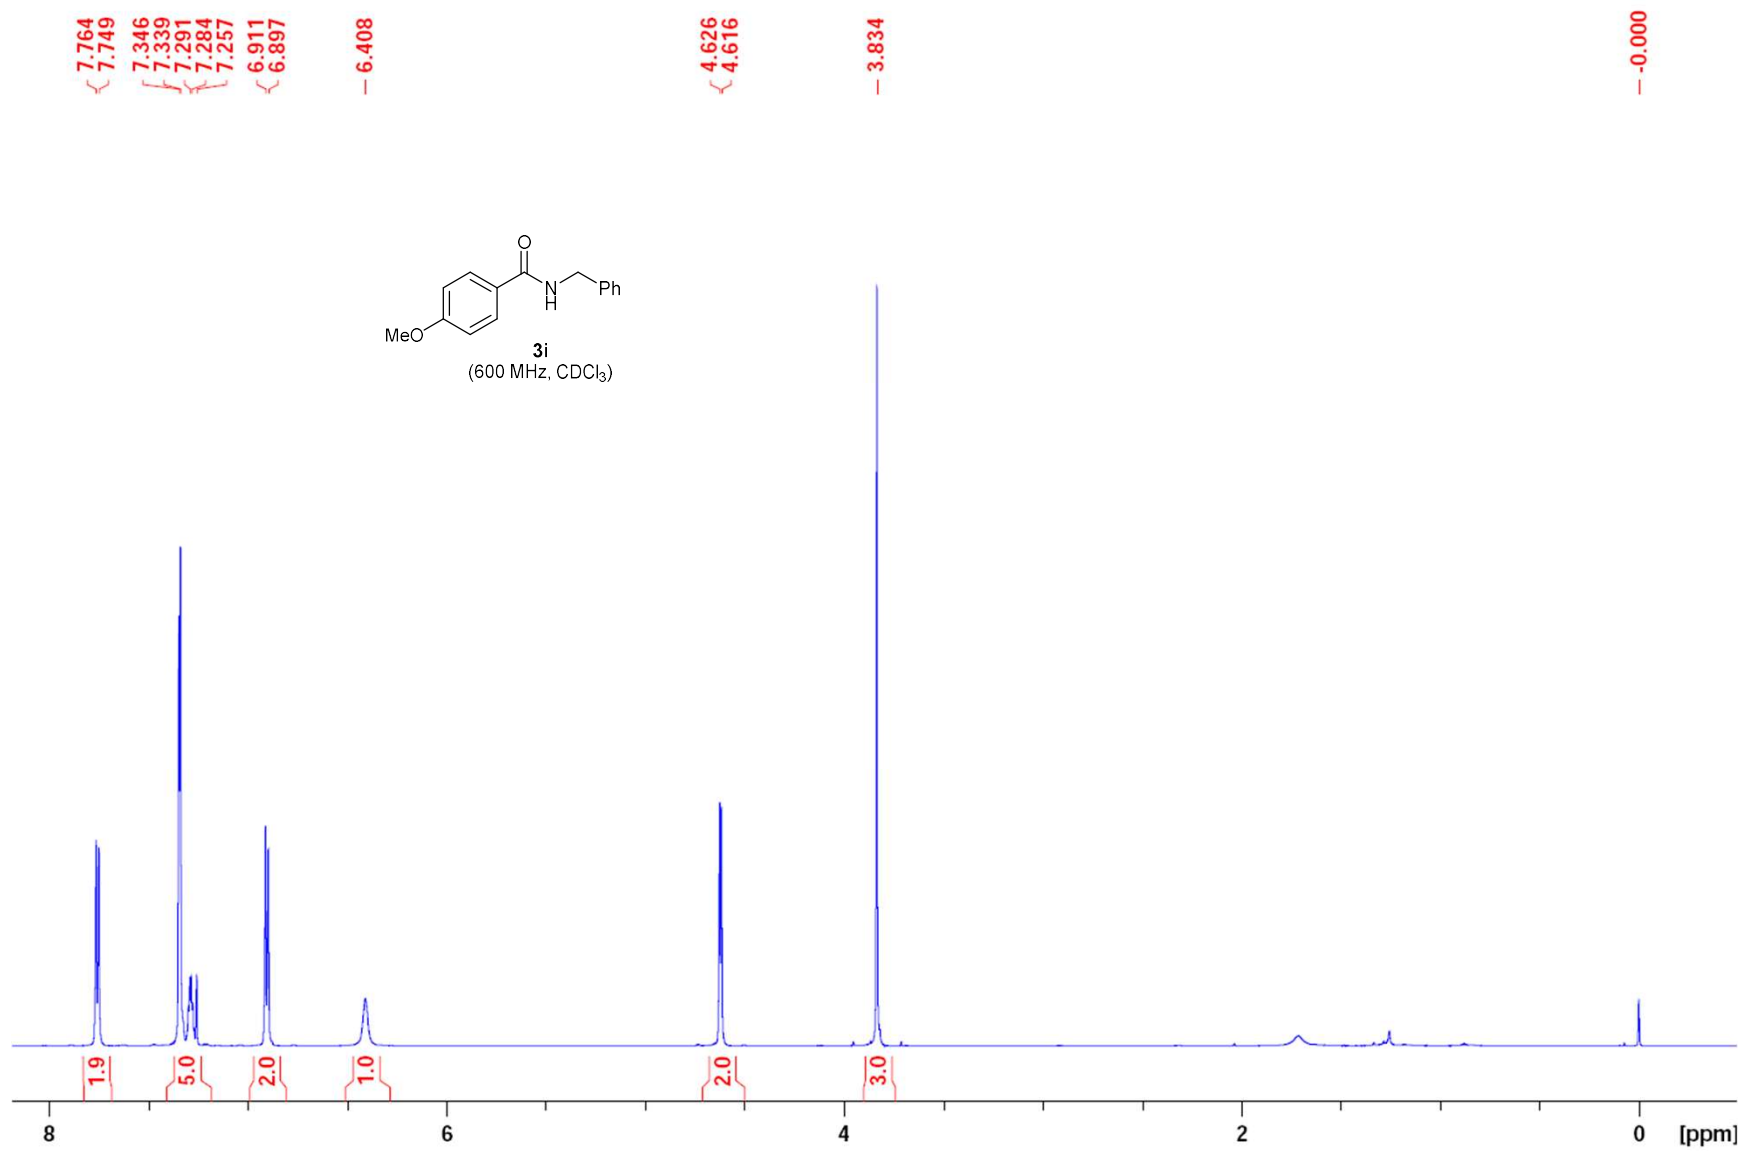

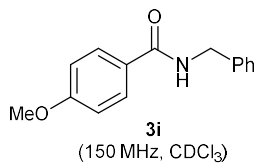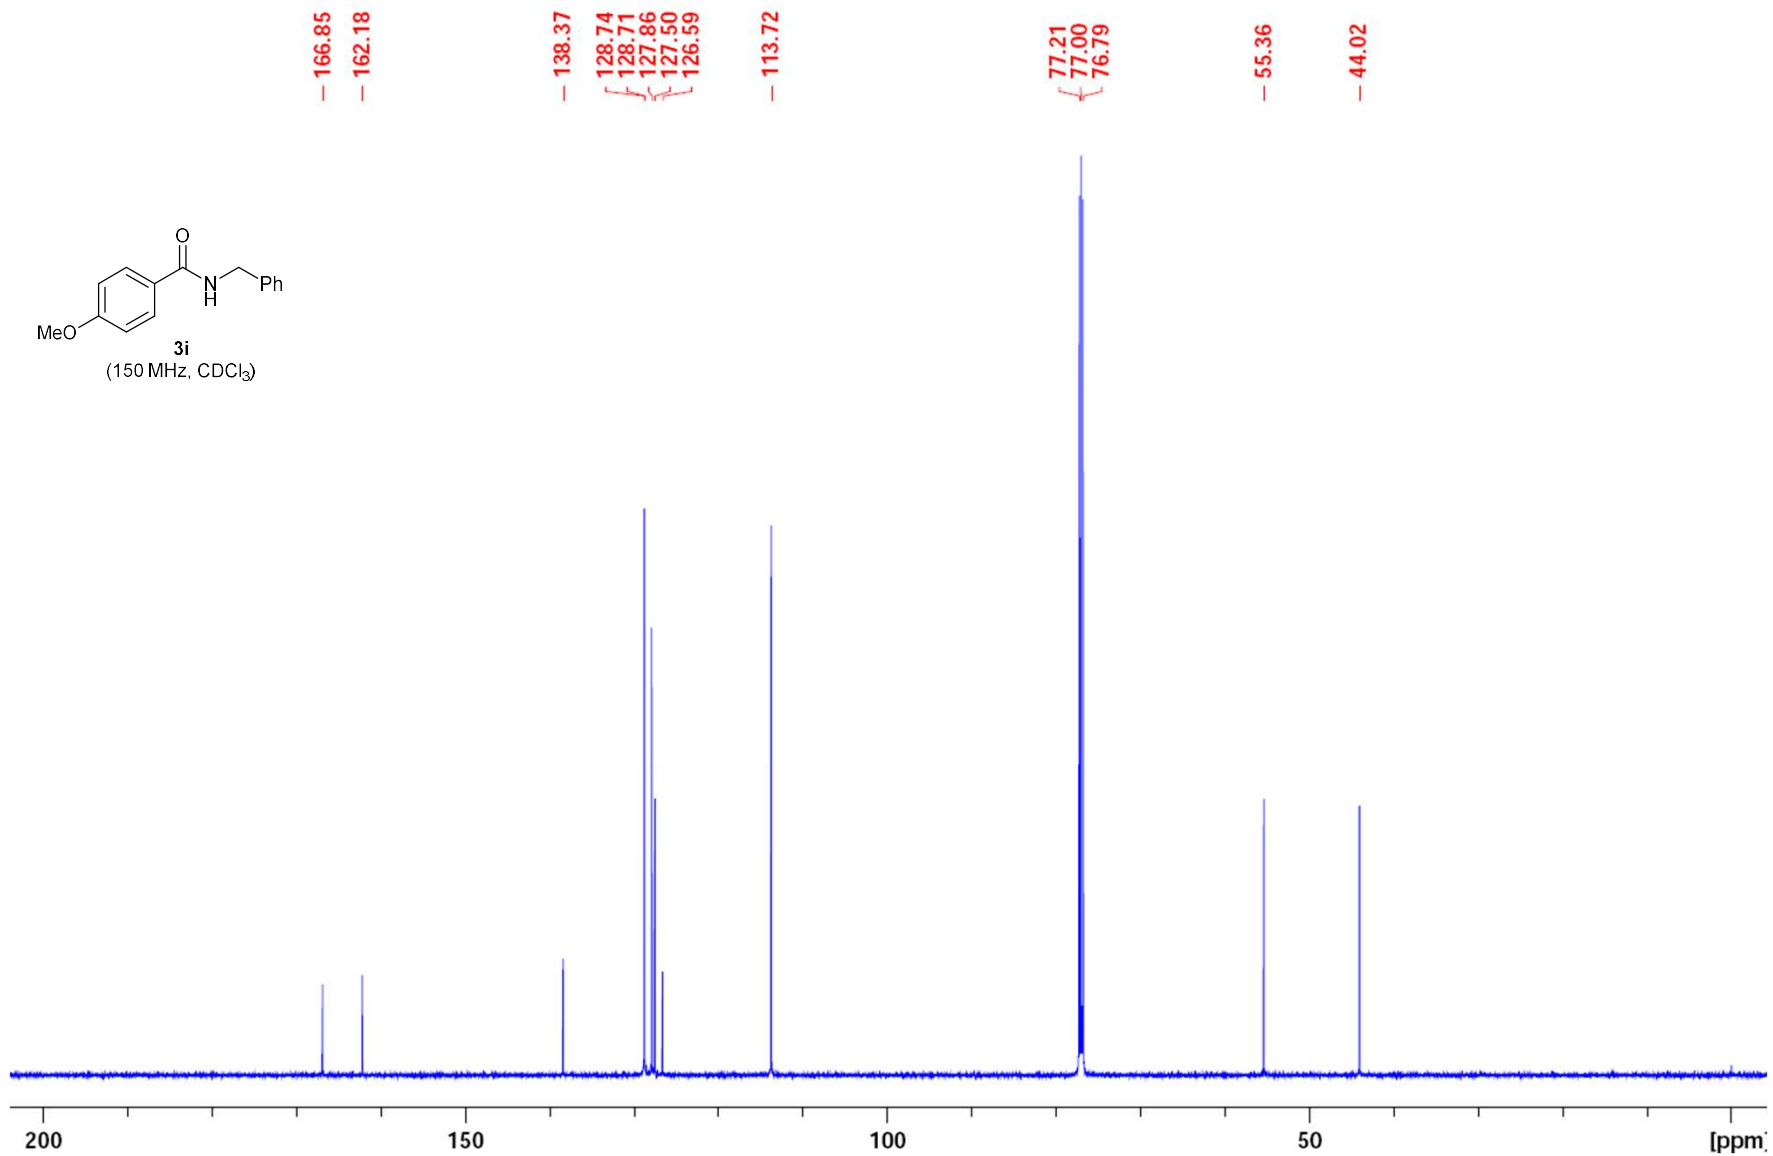

7.342  
7.330  
7.318  
7.278  
7.265

- 5.916

4.419  
4.410

- 2.007

- -0.000

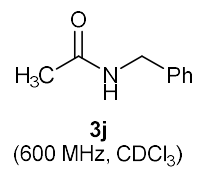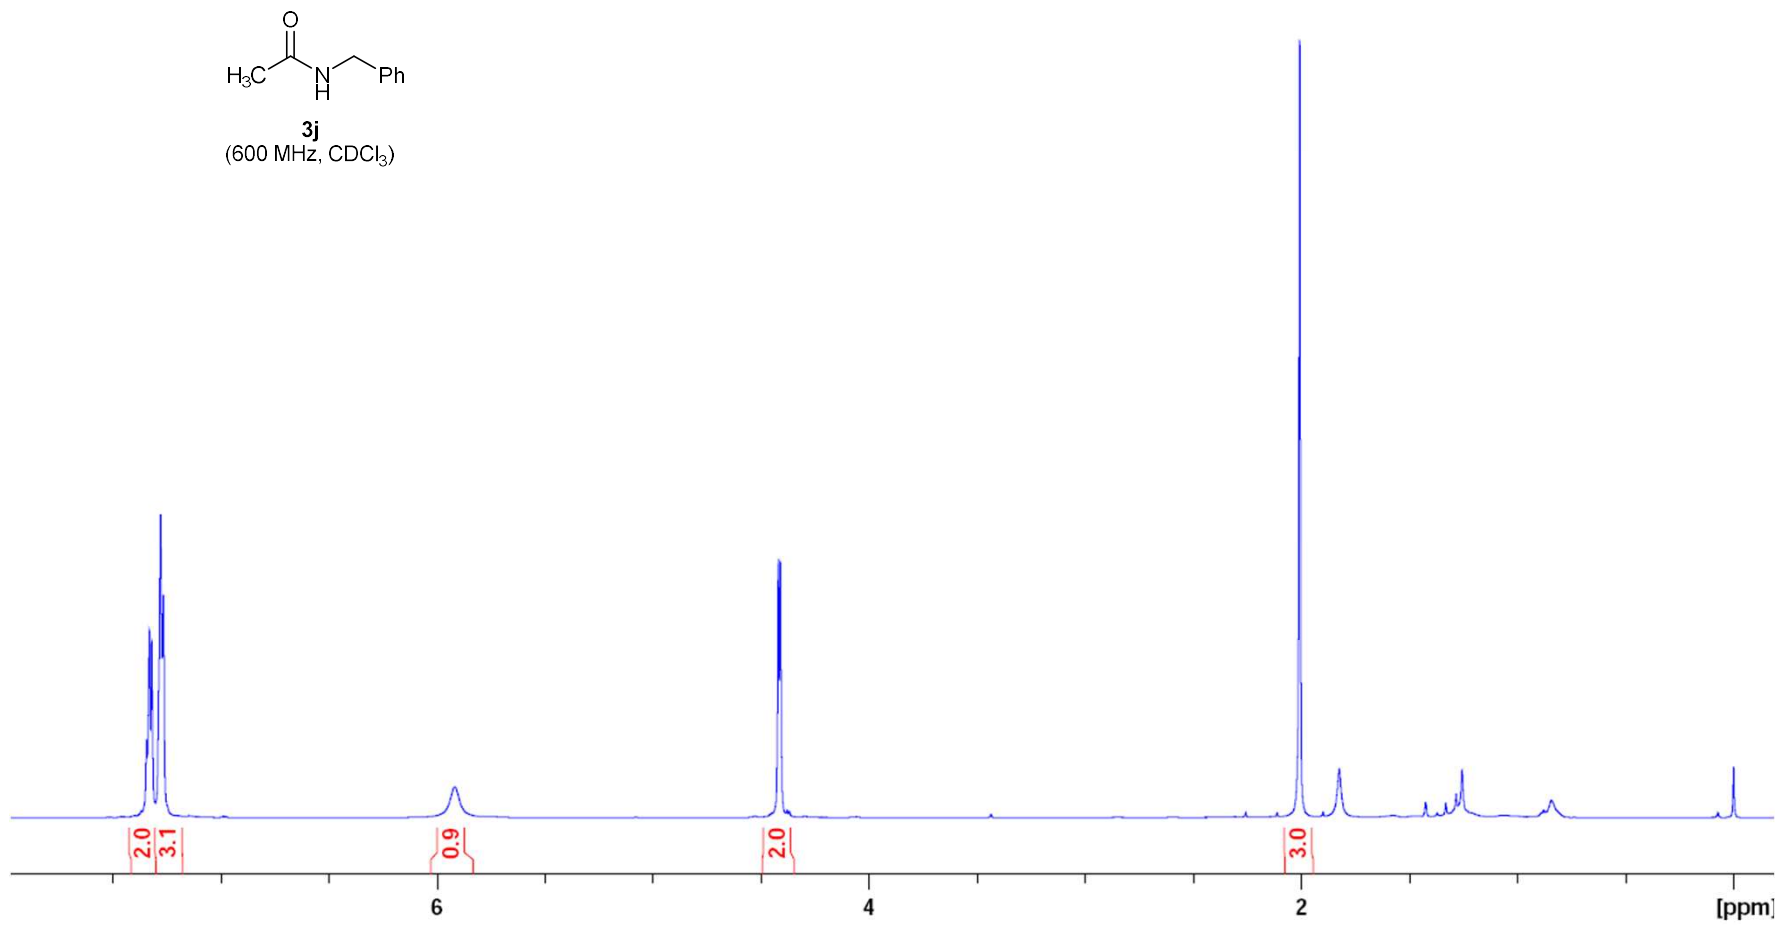

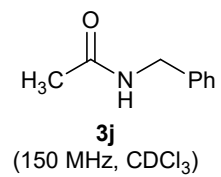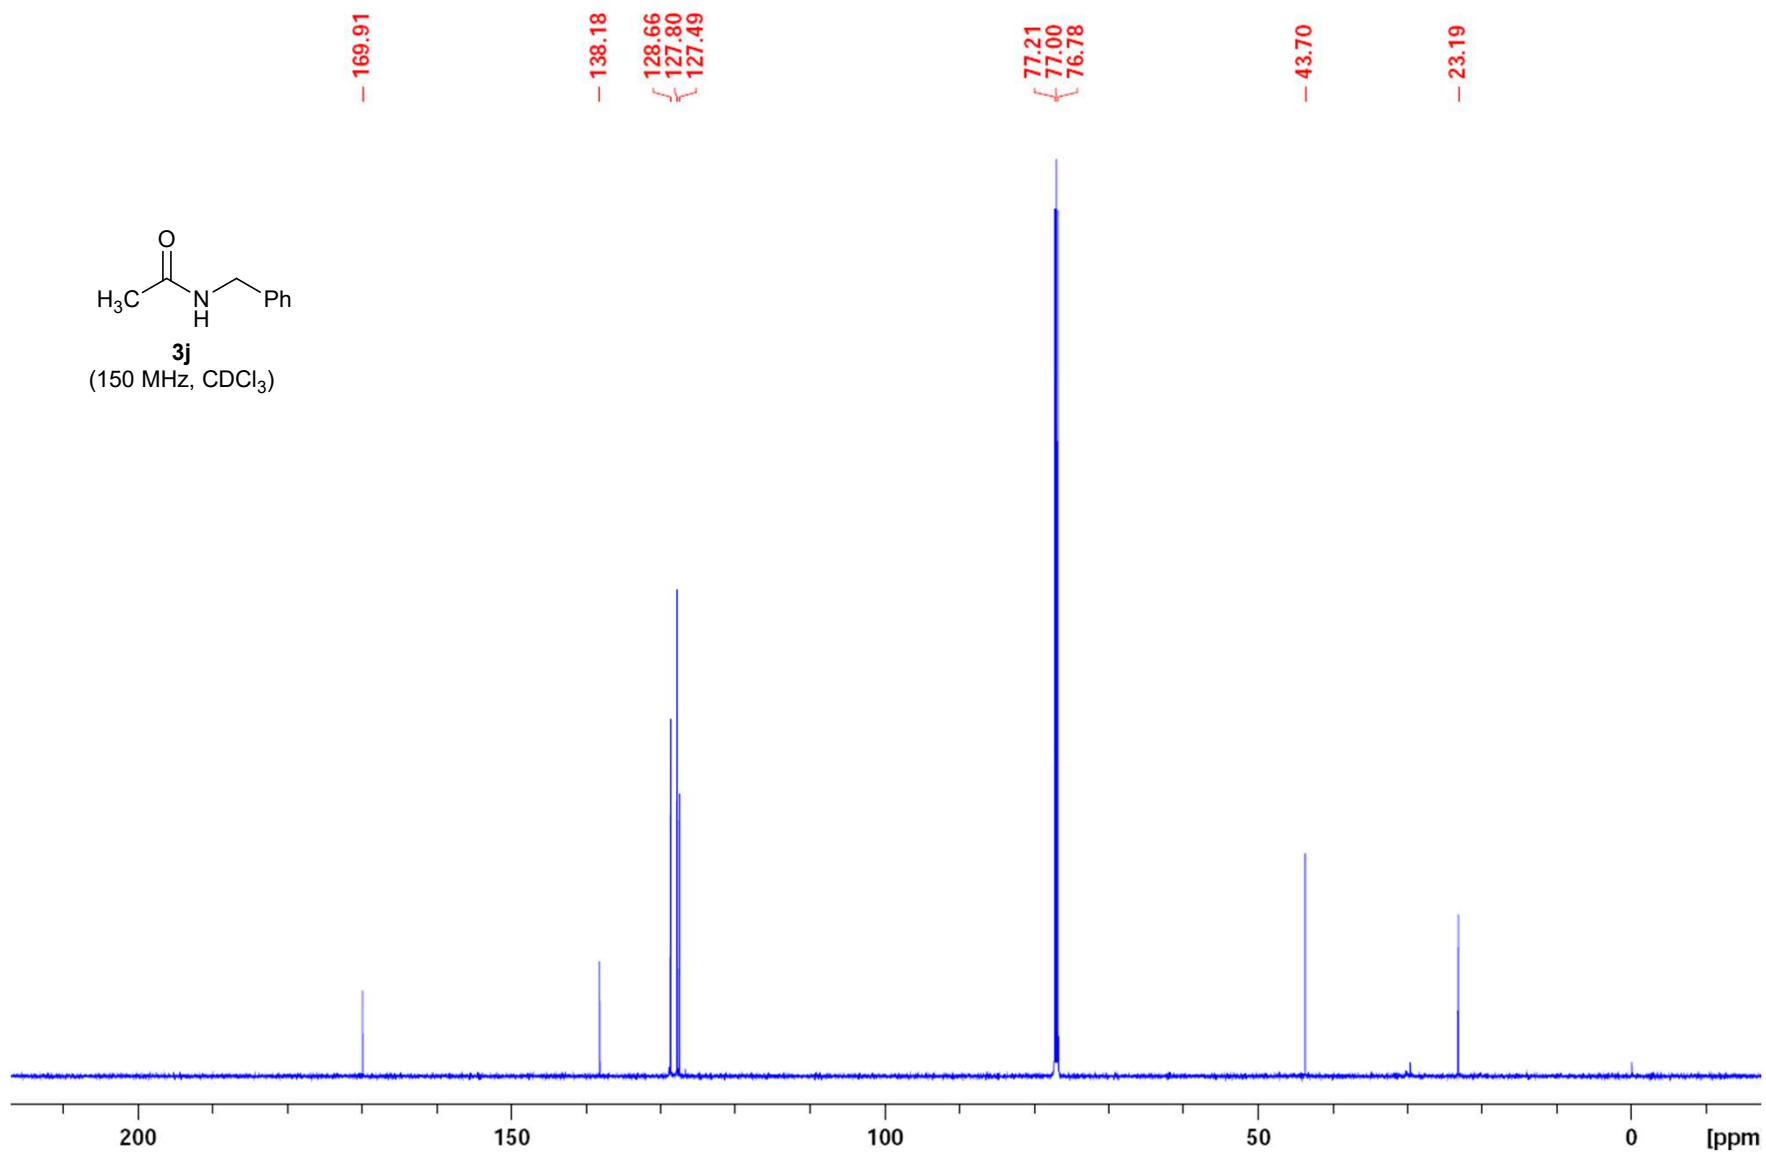

7.847  
7.507  
7.493  
7.301  
7.288  
7.276  
7.258  
7.101  
7.088  
7.076

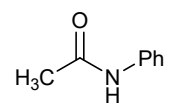

**3k**  
(600 MHz, CDCl<sub>3</sub>)

- 2.143

- -0.000

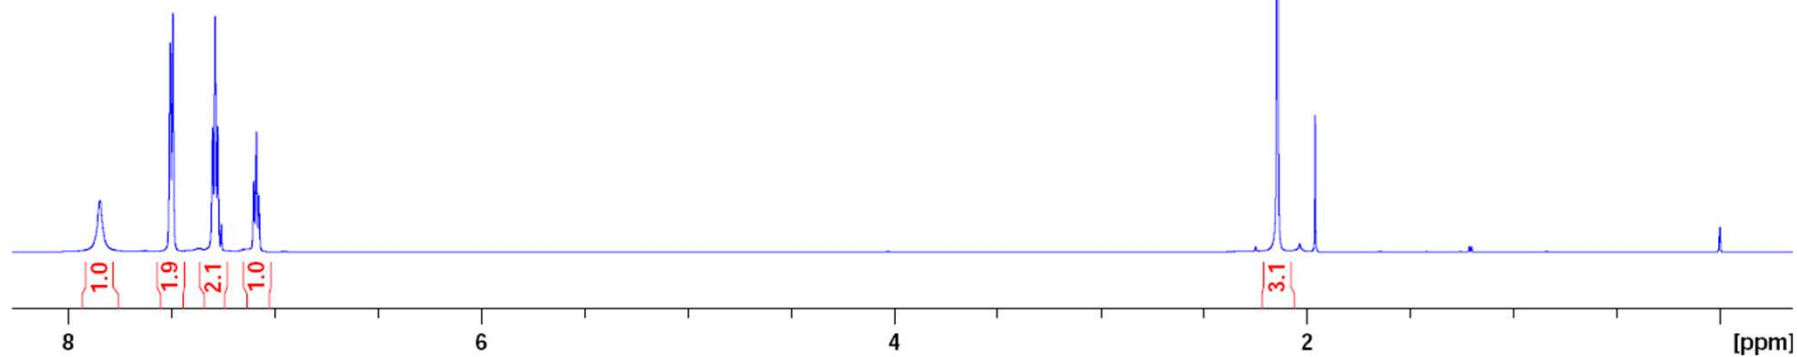

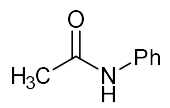

**3k**  
(150 MHz, CDCl<sub>3</sub>)

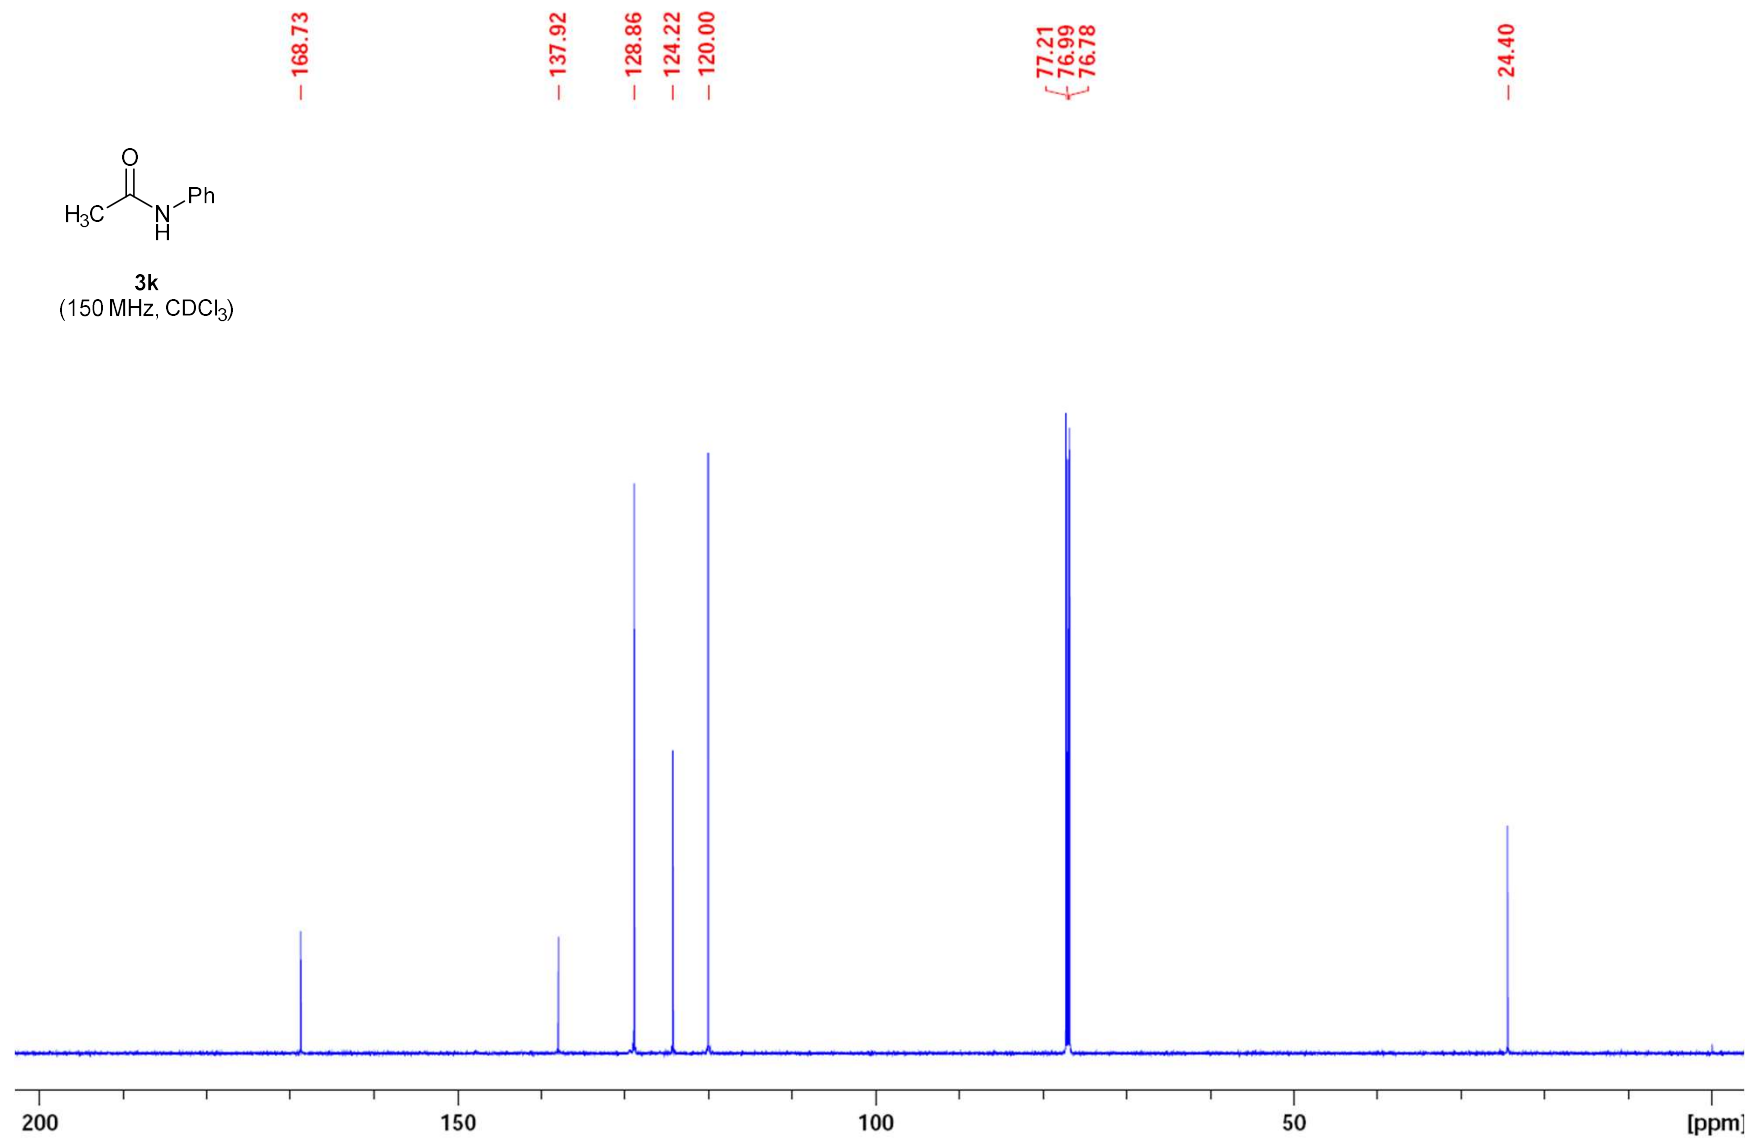

- 7.730  
{ 7.388  
7.373  
7.267  
{ 6.831  
6.817

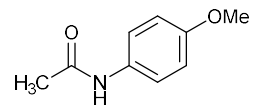

**31**  
(600 MHz, CDCl<sub>3</sub>)

- 3.770

- 2.116

- -0.000

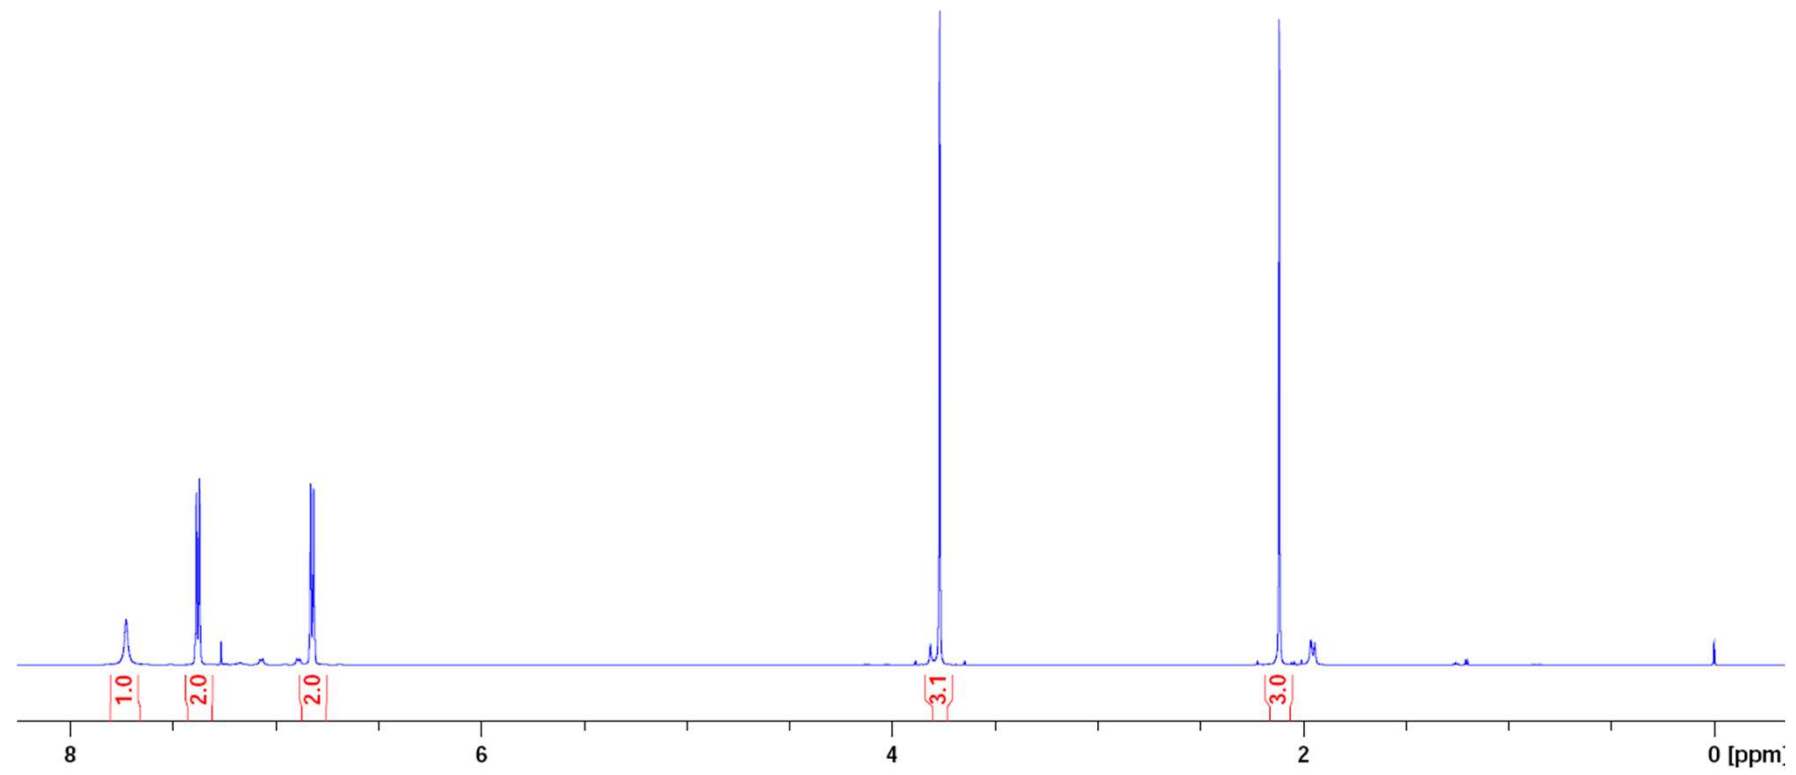

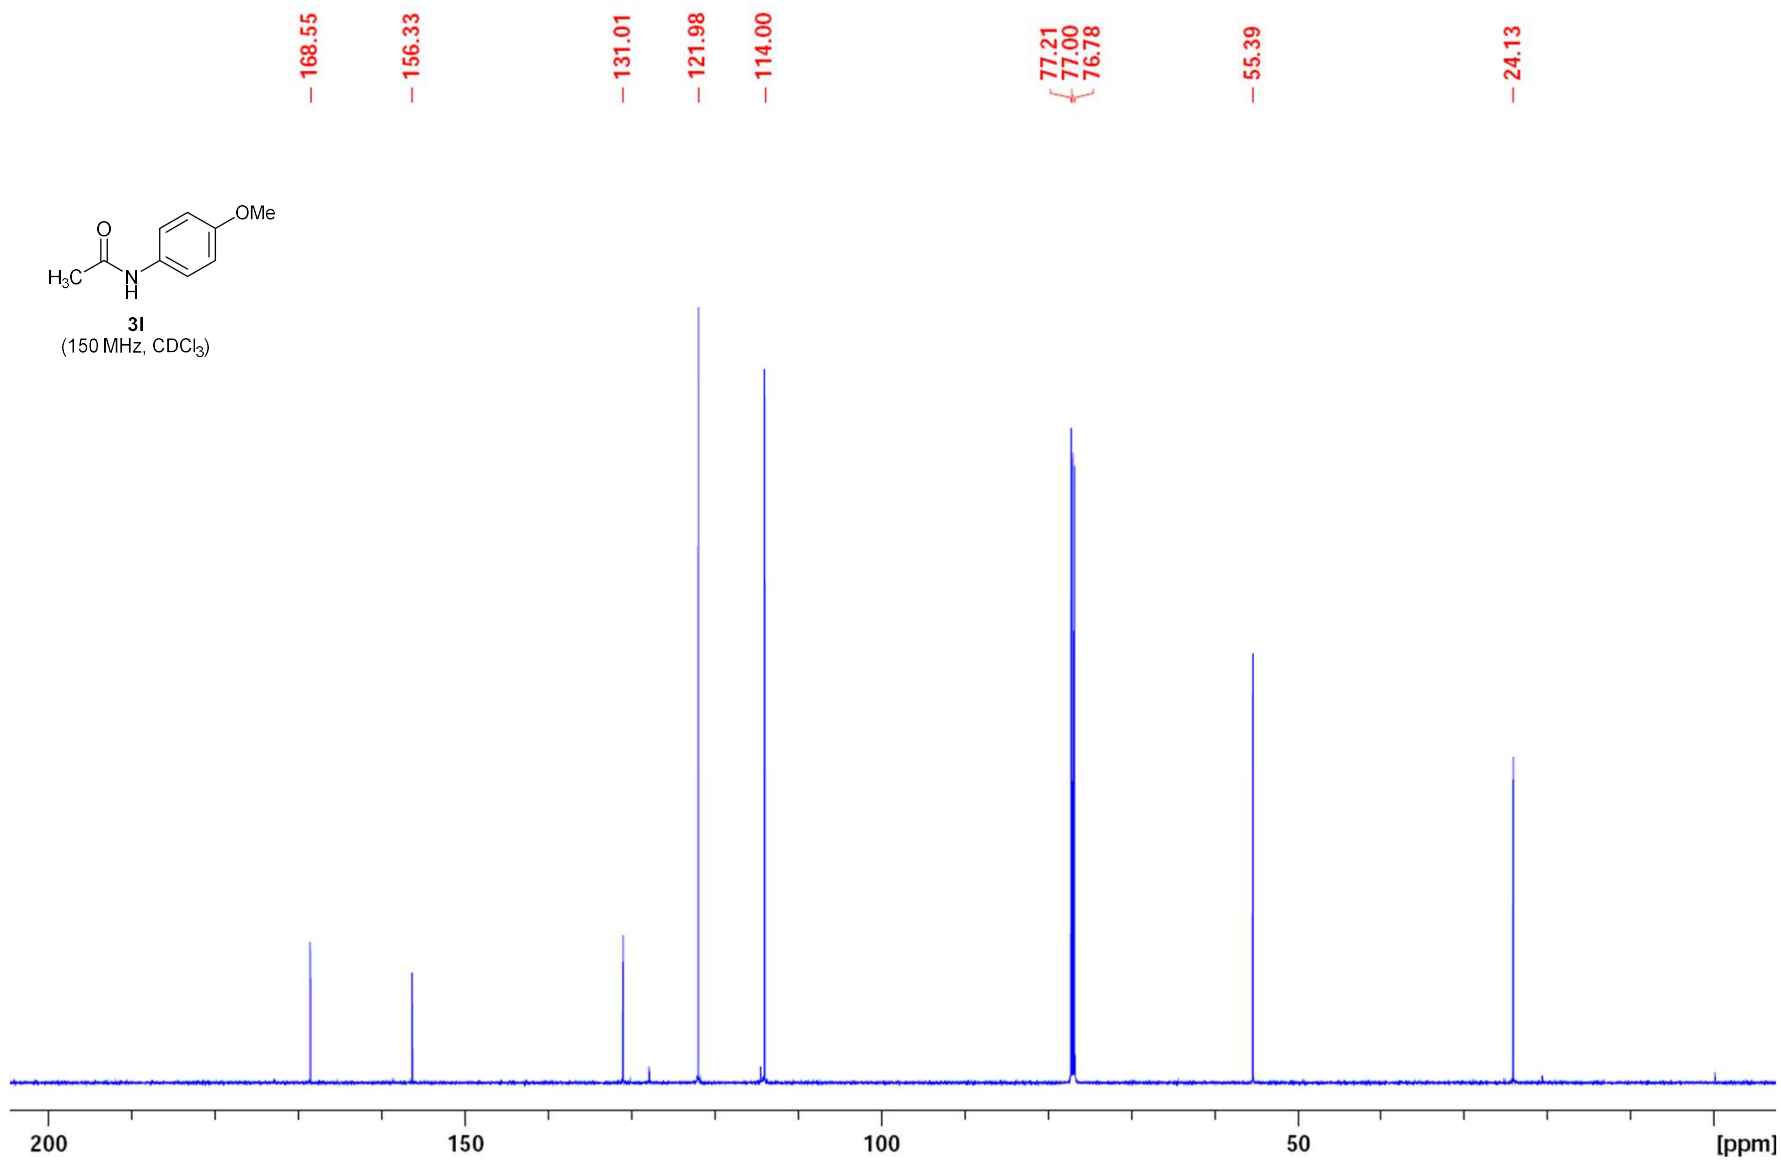

7.458  
7.444  
7.281  
7.267  
7.263

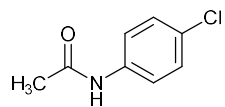

**3m**  
(600 MHz, CDCl<sub>3</sub>)

- 2.173

- -0.000

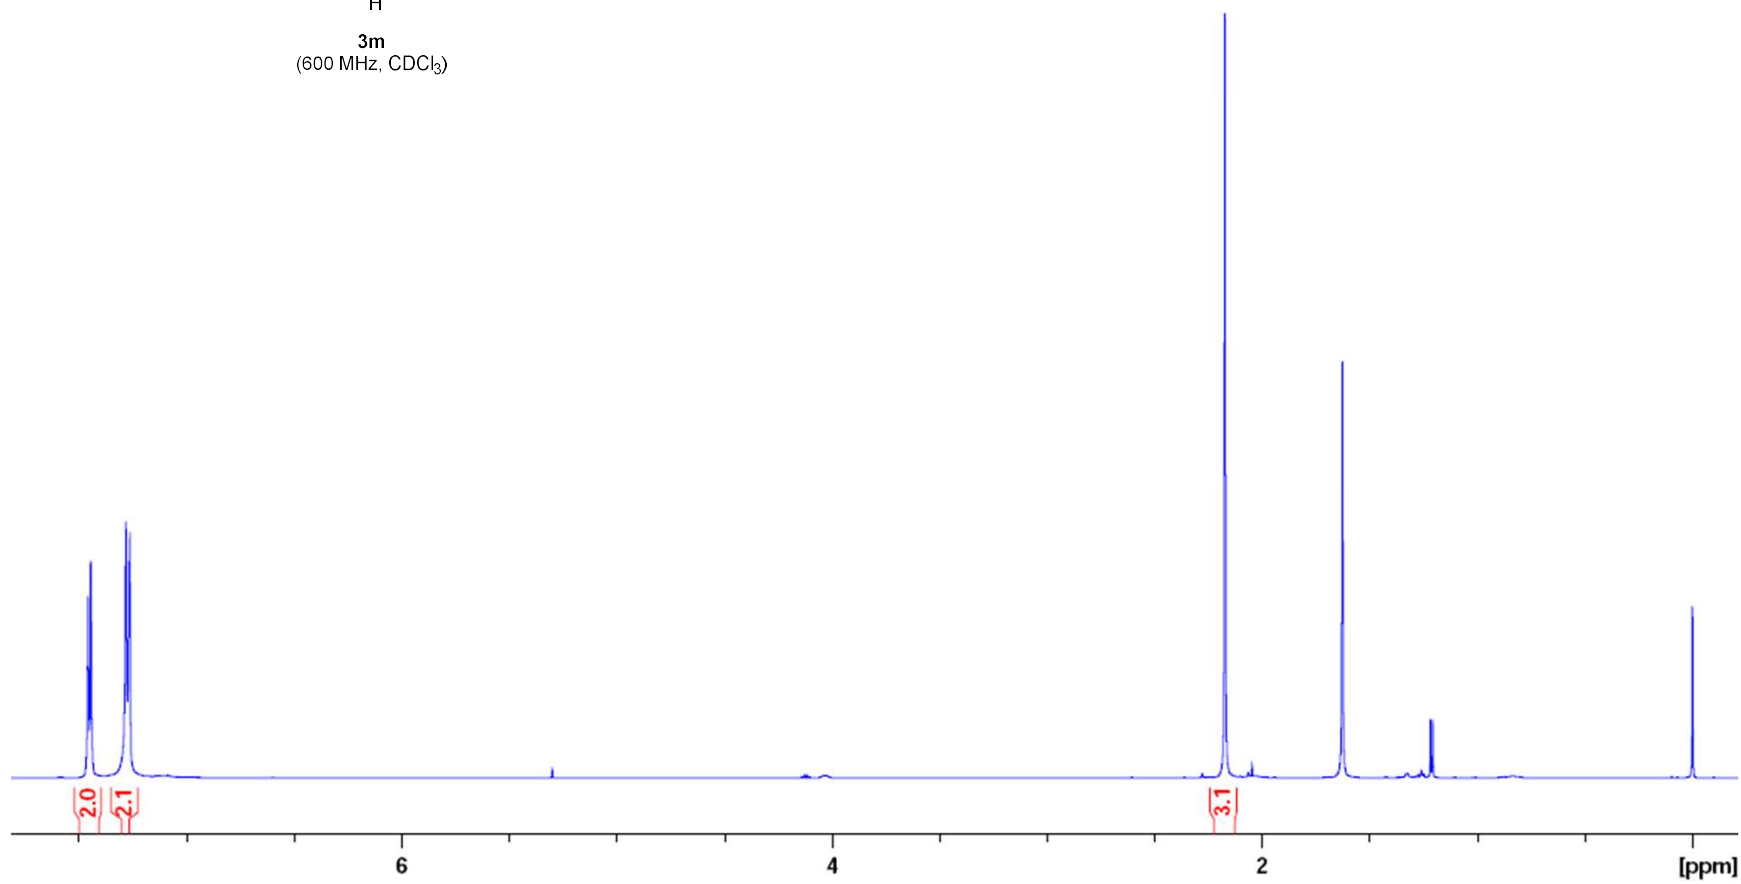

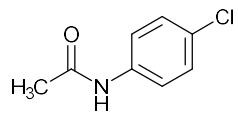

**3m**  
(150 MHz, CDCl<sub>3</sub>)

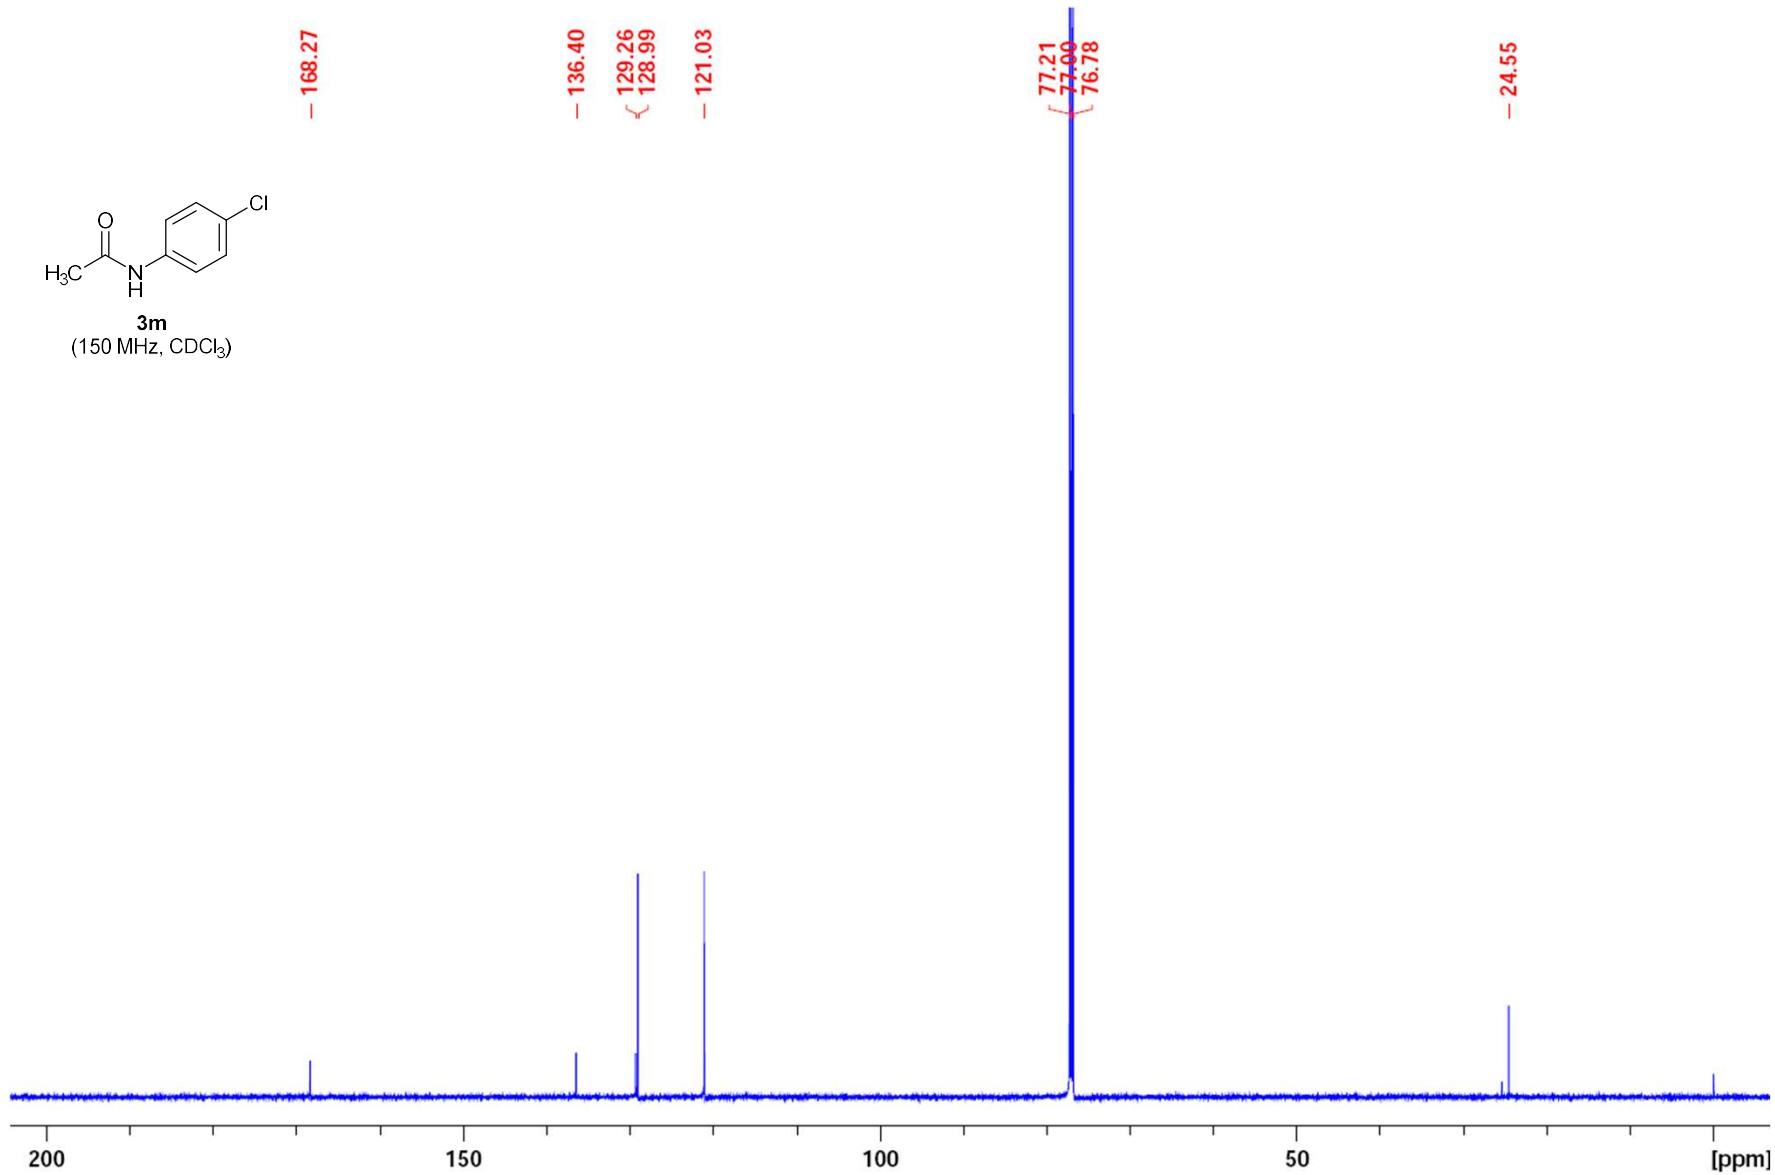

7.389  
7.358  
7.351  
7.319  
7.306  
7.294  
7.281  
7.260  
7.040  
7.027

6.433

4.646  
4.637

3.842

-0.000

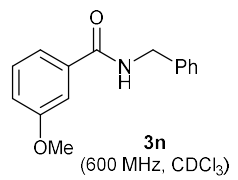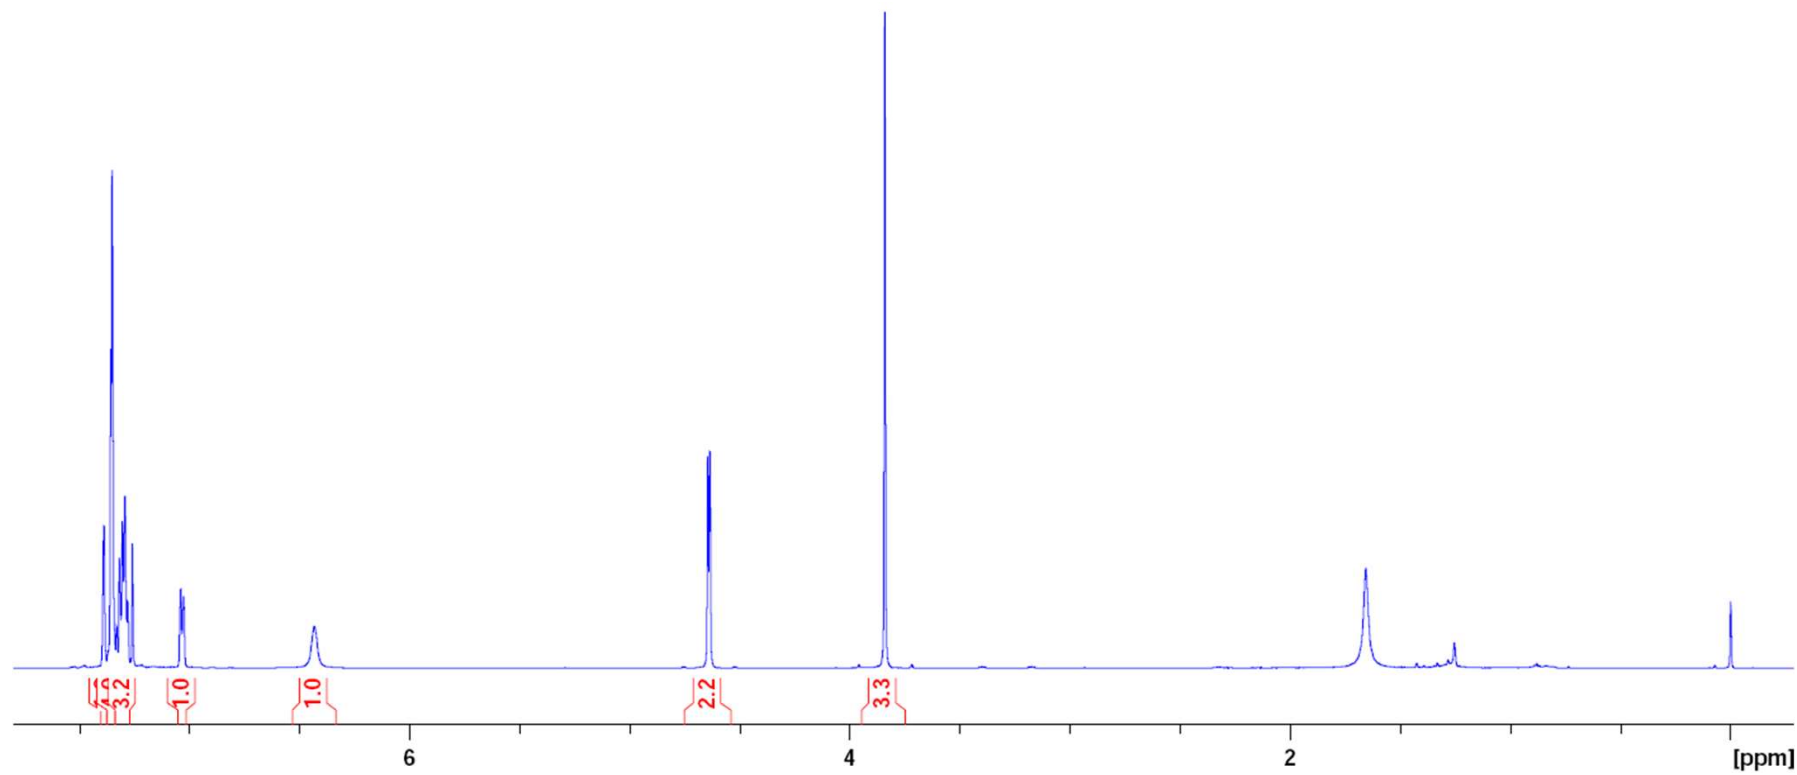

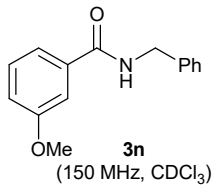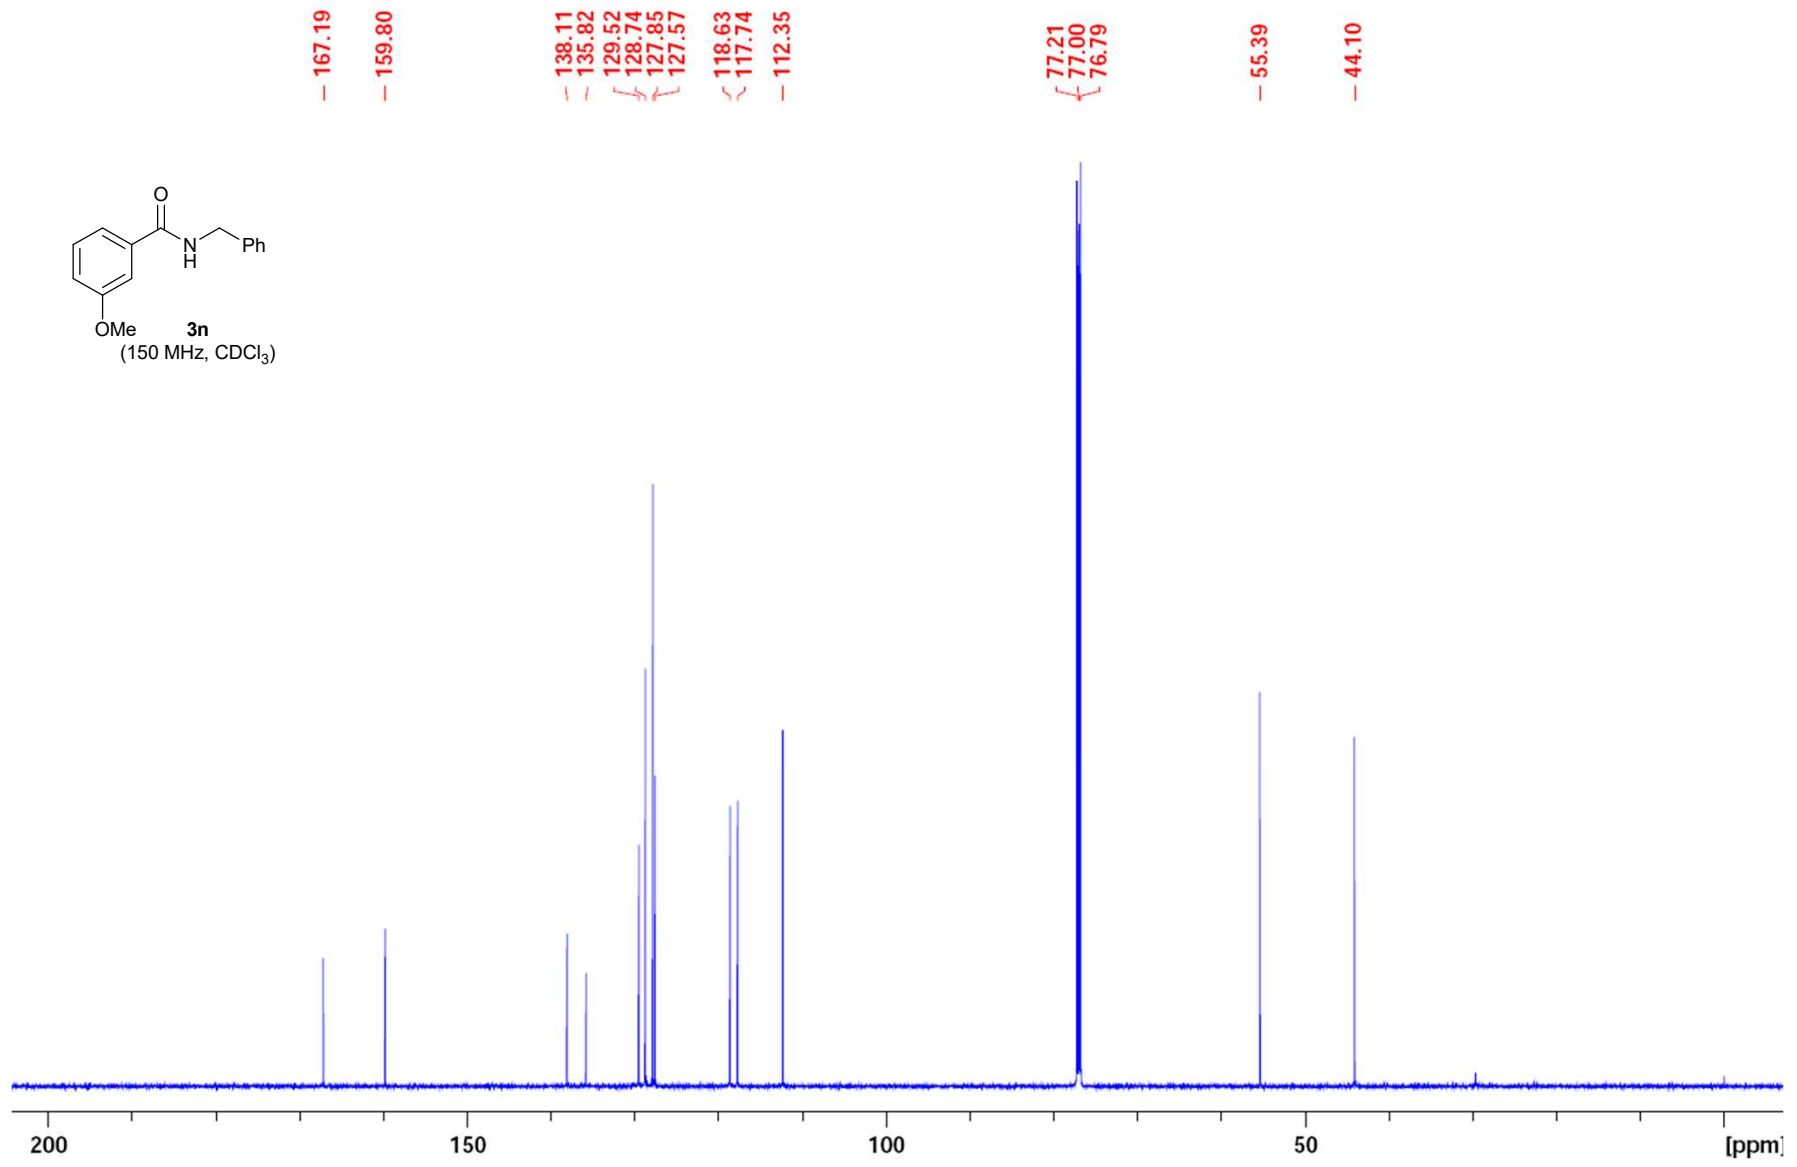

7.725  
7.711  
7.389  
7.376  
7.351  
7.326  
7.297  
7.257

- 6.484

4.620  
4.610

- -0.000

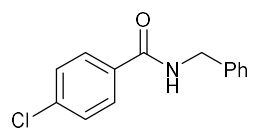

**3o**  
(600 MHz, CDCl<sub>3</sub>)

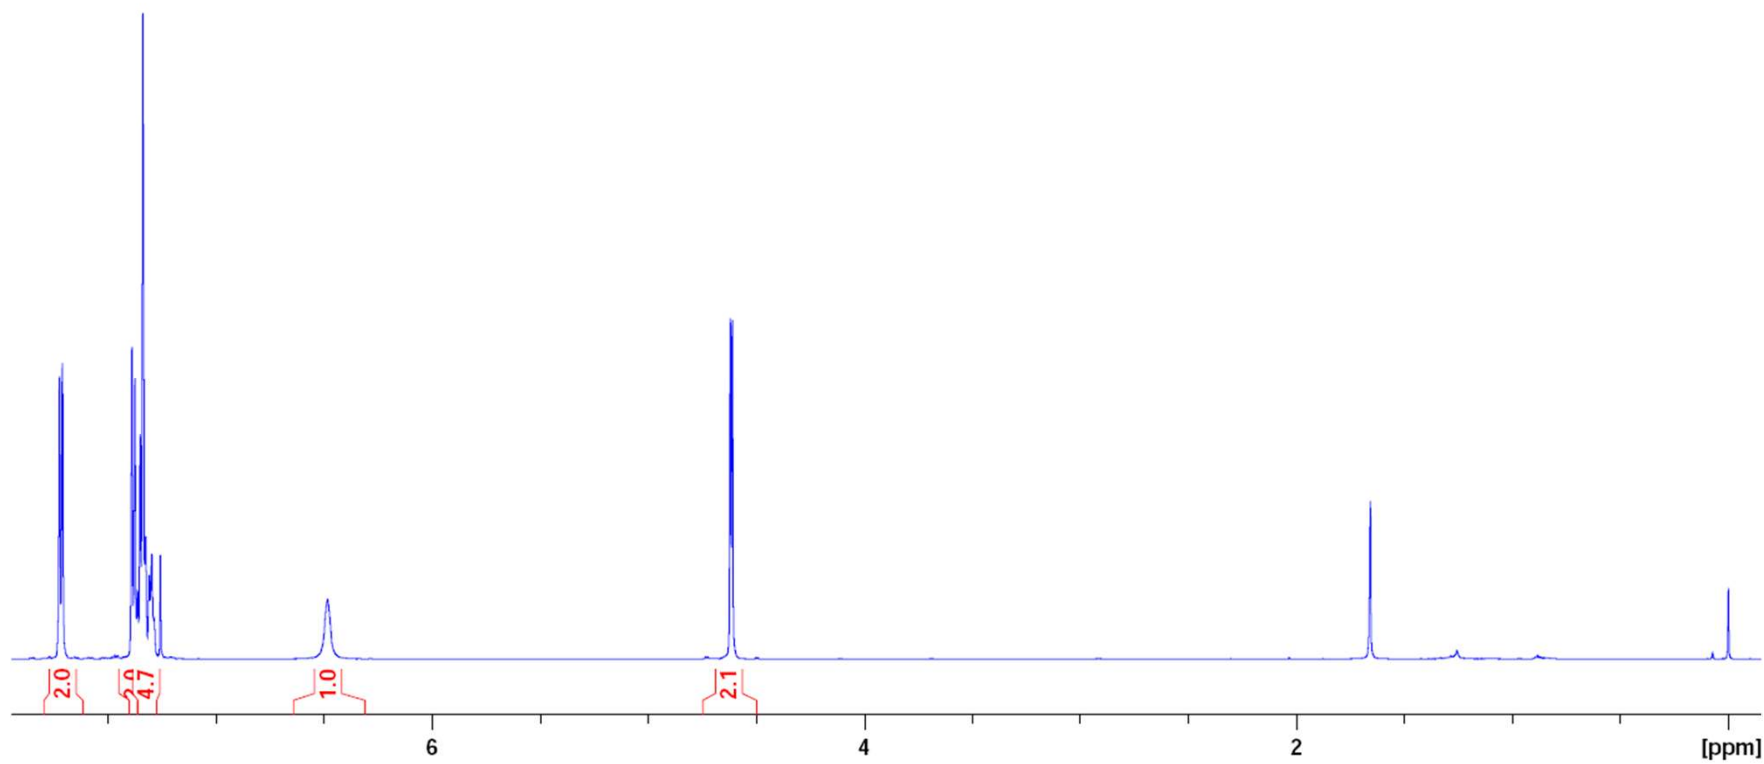

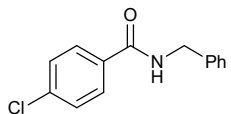

**3o**  
(150 MHz, CDCl<sub>3</sub>)

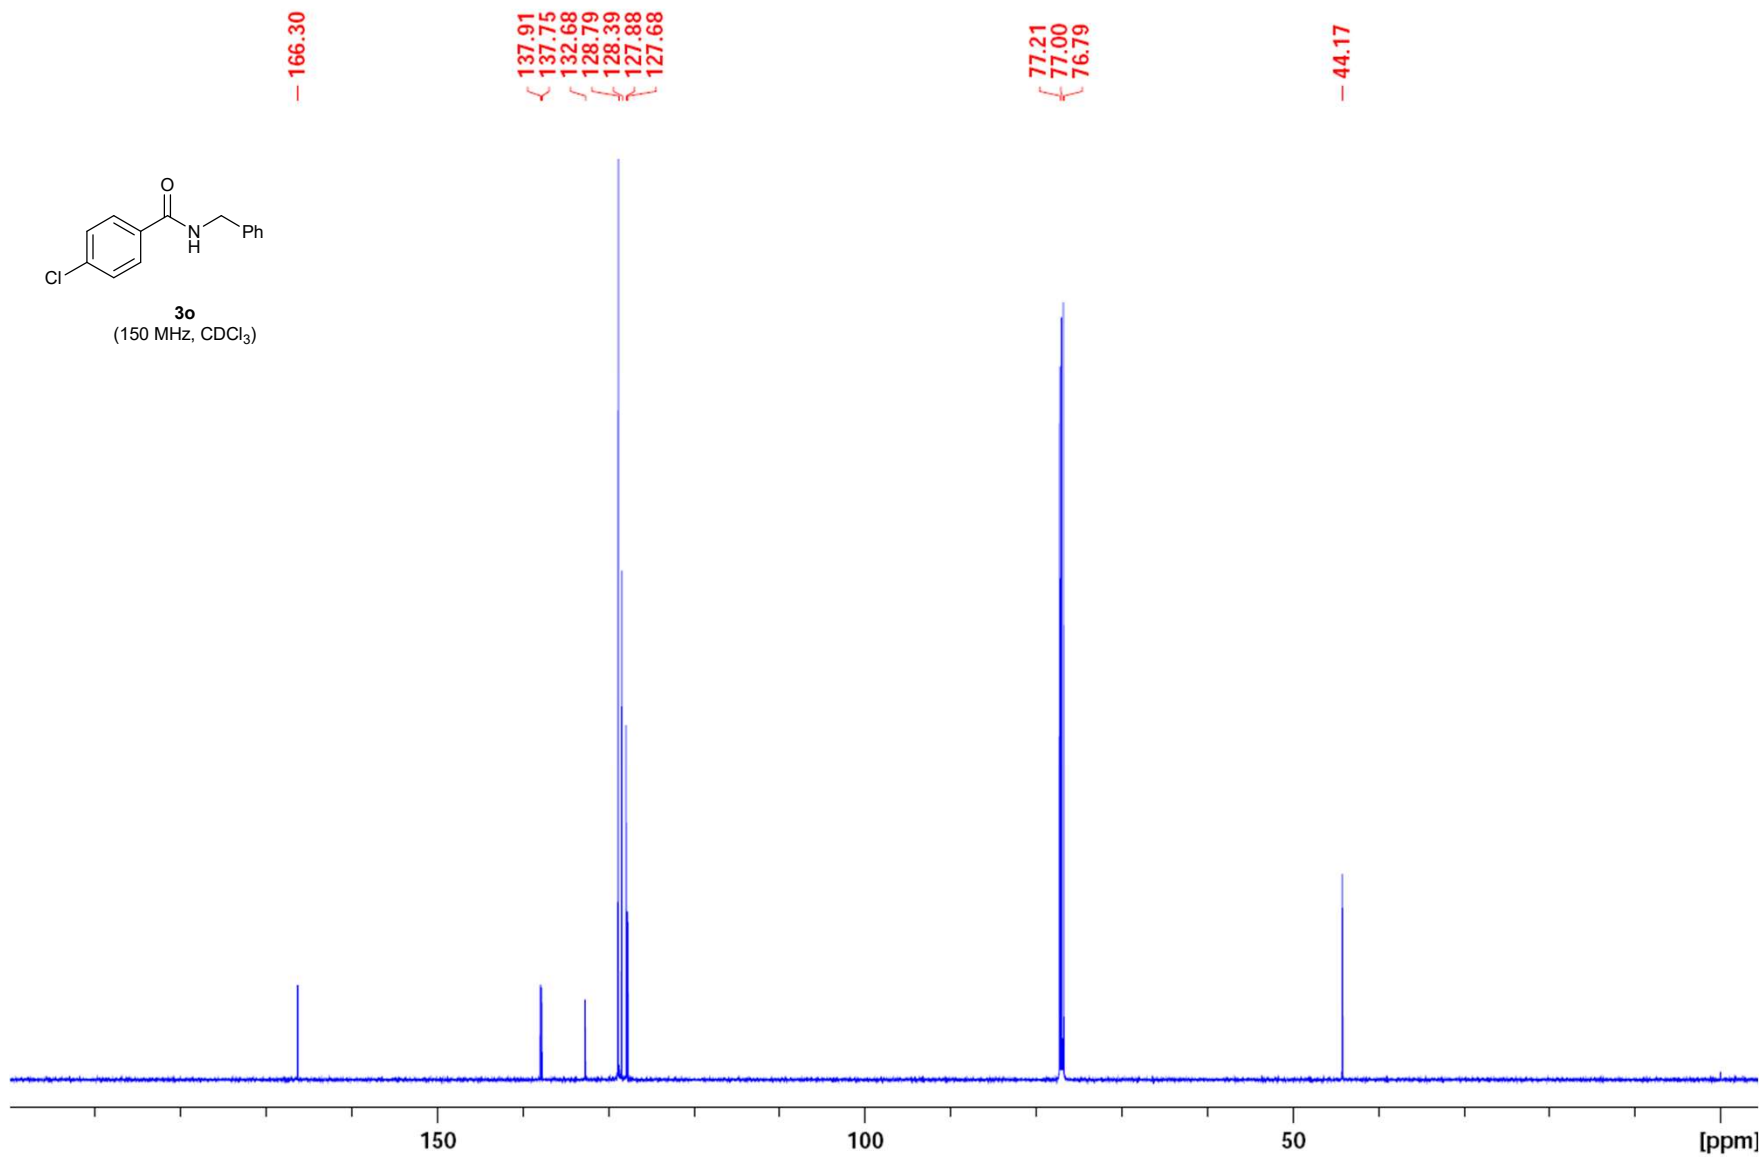

7.977  
7.964  
7.761  
7.748  
7.575  
7.562  
7.549  
7.366  
7.362  
7.357  
7.321  
7.312  
7.260

- 6.549

4.657  
4.647

-0.000

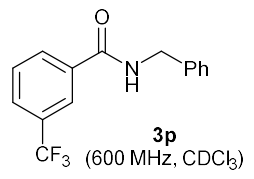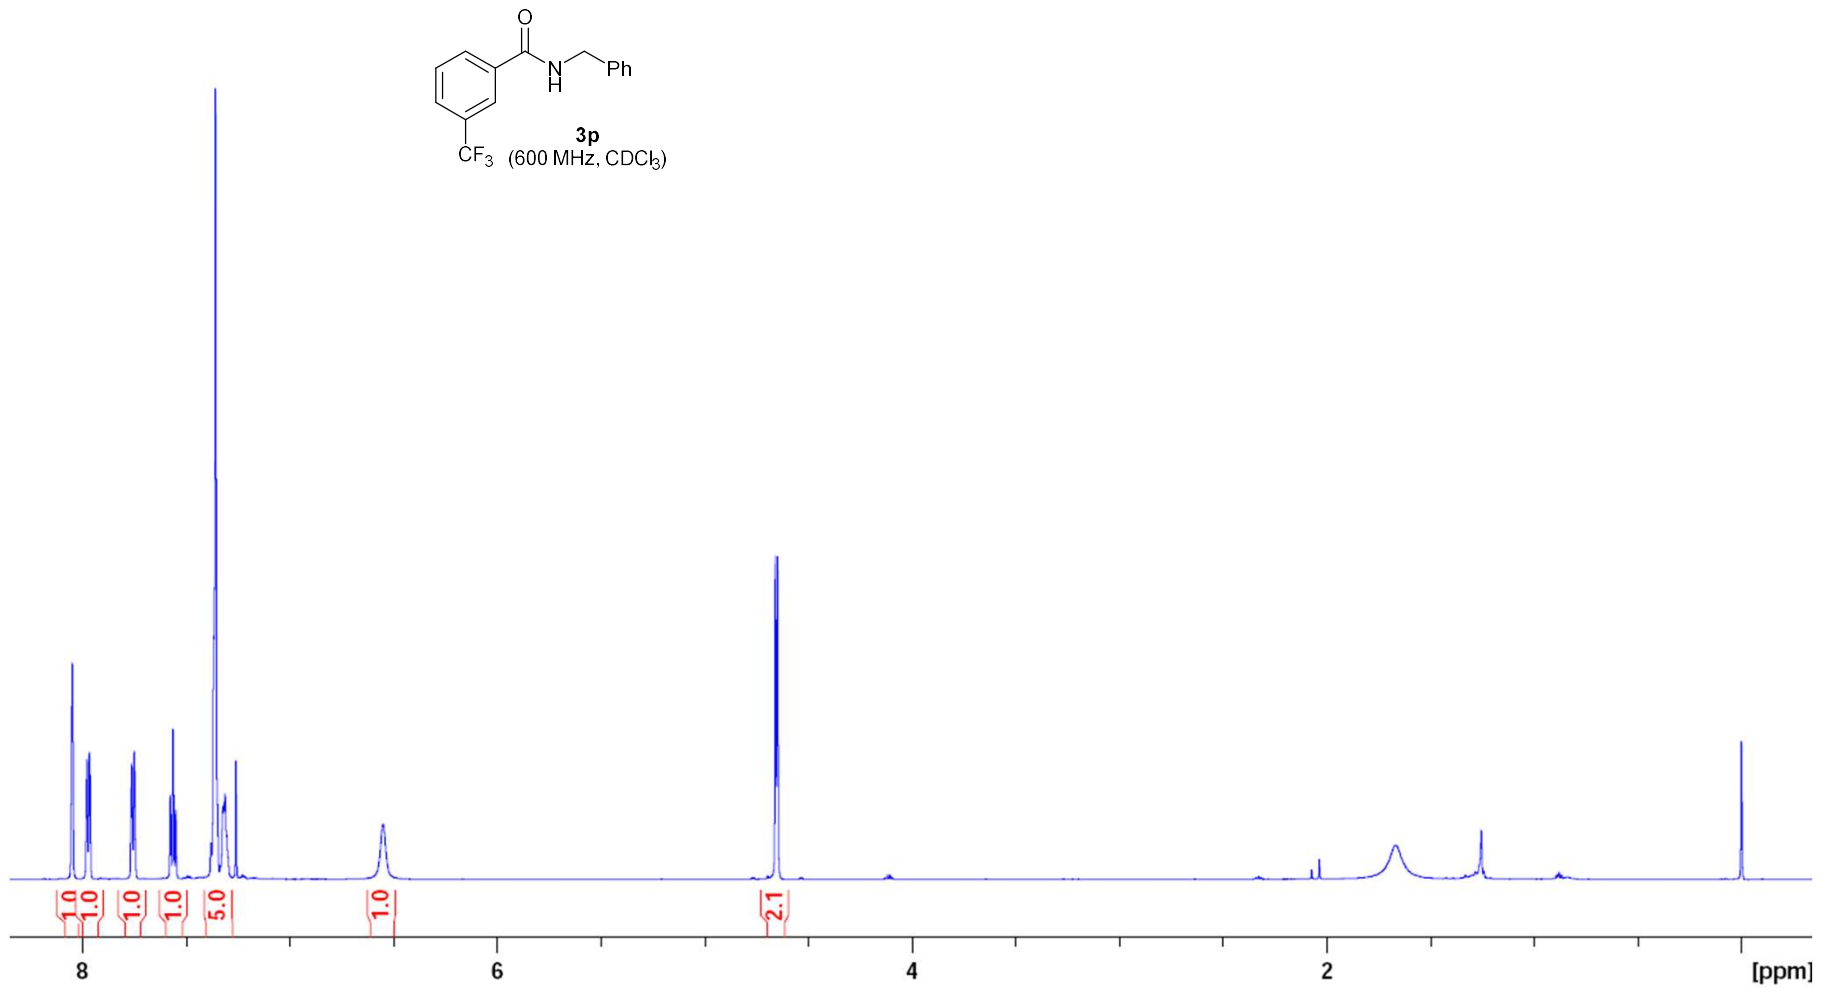

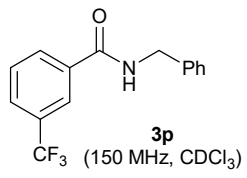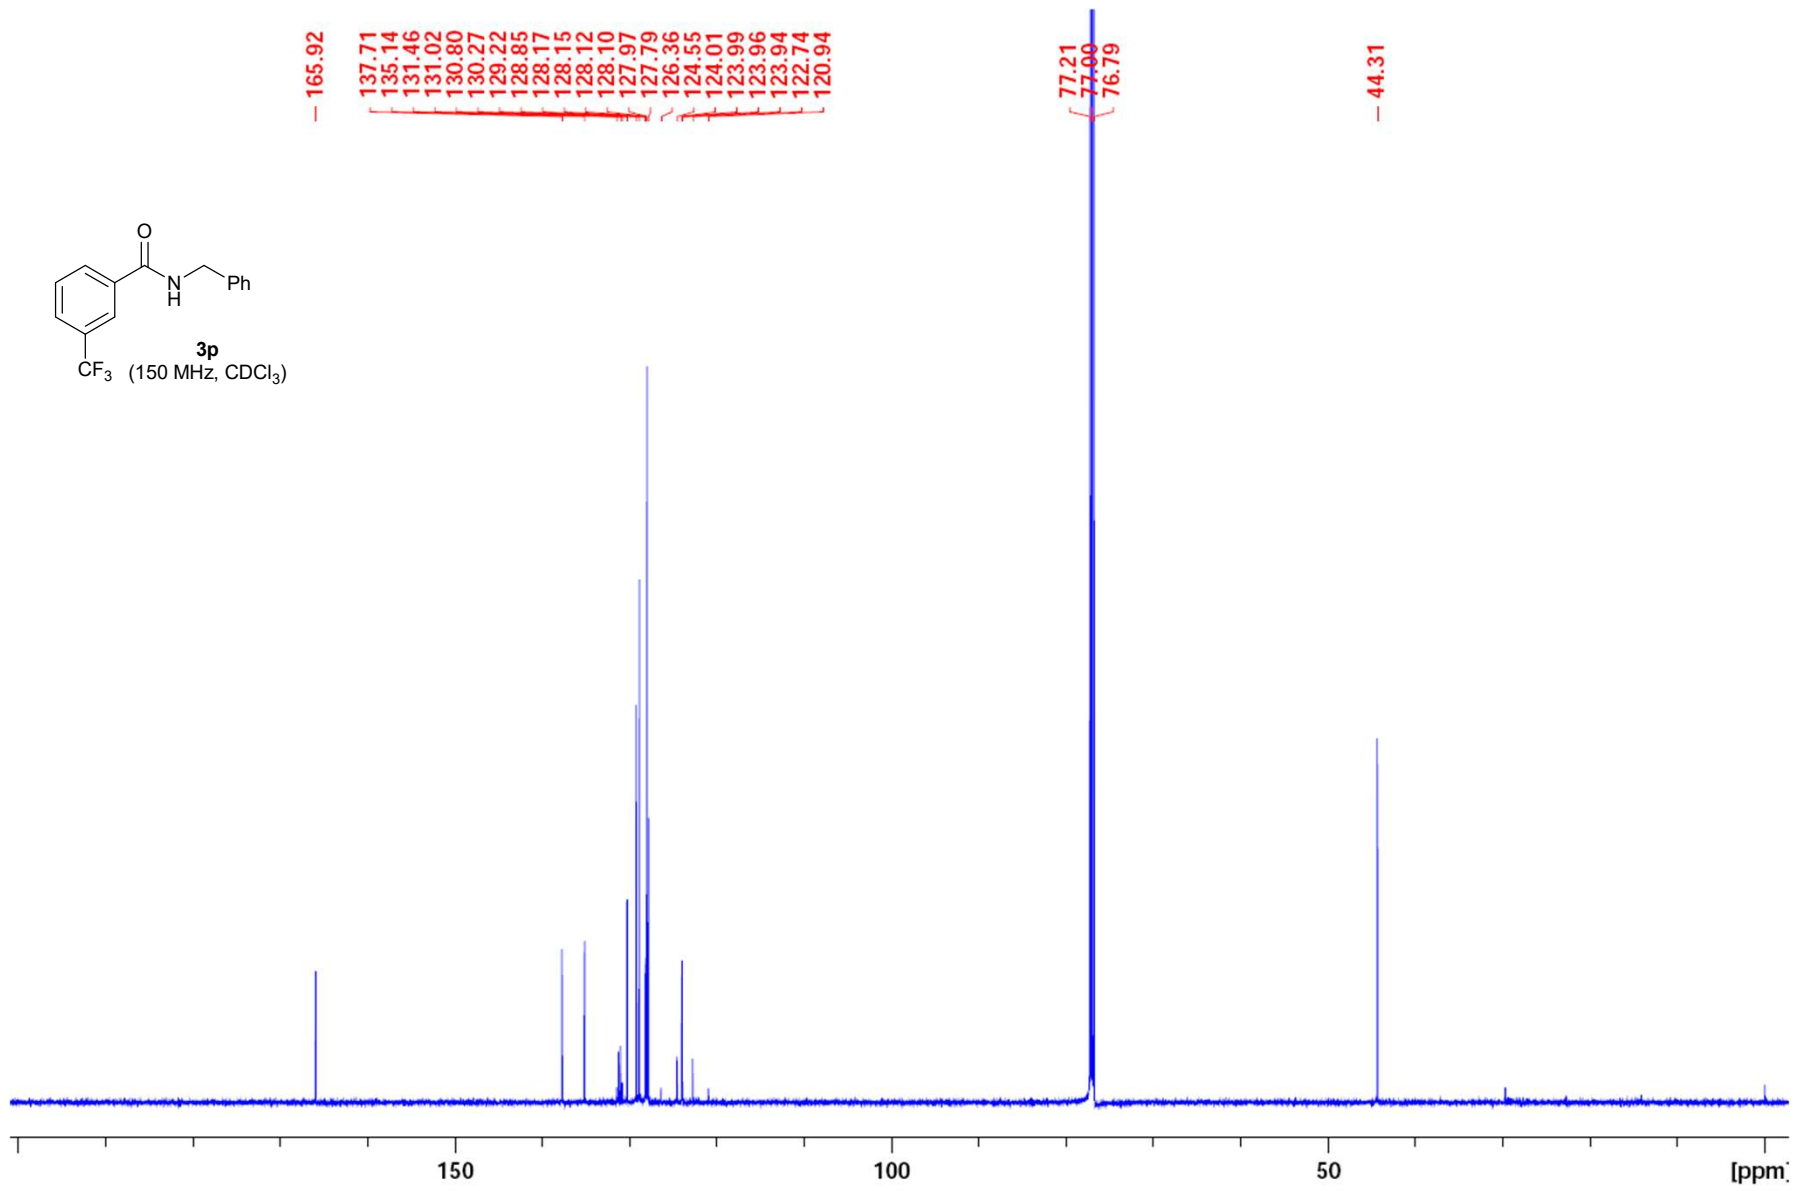

8.936  
8.654  
8.652  
8.646  
8.644  
8.139  
8.136  
8.133  
8.126  
8.122  
8.119  
7.363  
7.355  
7.350  
7.345  
7.343  
7.337  
7.329  
7.297  
7.289  
7.269  
6.947

4.637  
4.628

-0.000

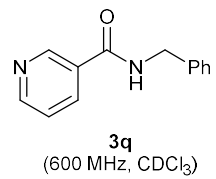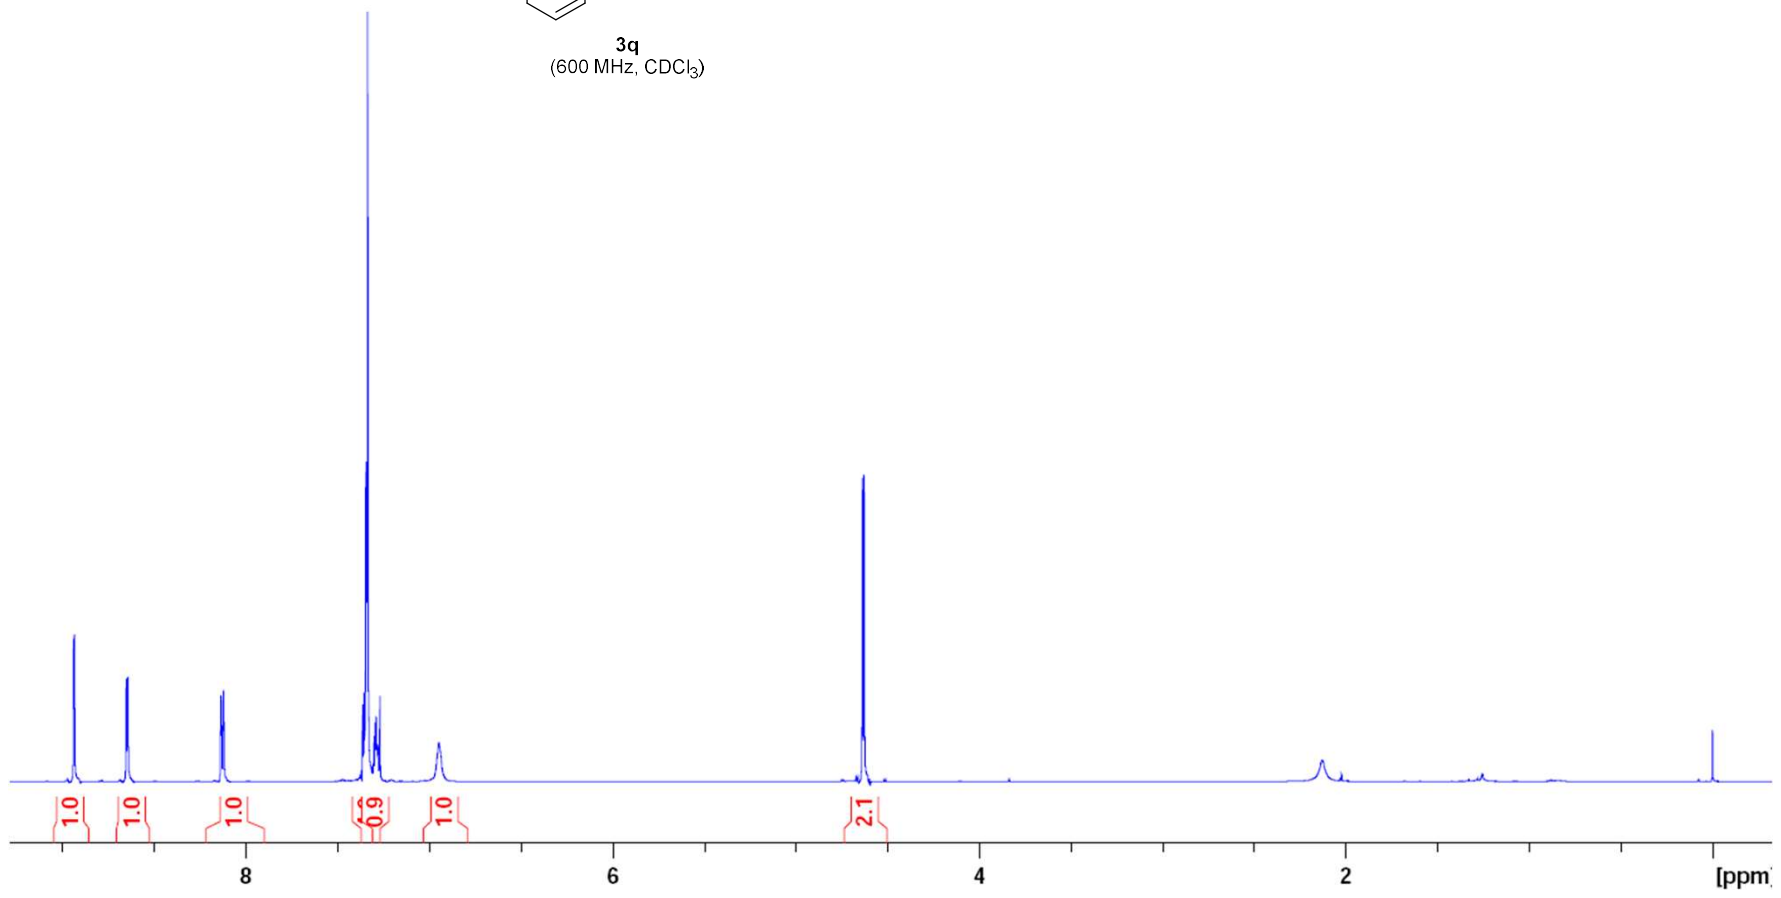

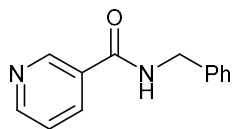

**3q**  
(150 MHz, CDCl<sub>3</sub>)

— 165.48

— 152.09

— 147.82

— 137.73

— 135.24

— 130.07

— 128.76

— 127.88

— 127.68

— 123.47

{ 77.21

{ 77.00

{ 76.79

— 44.10

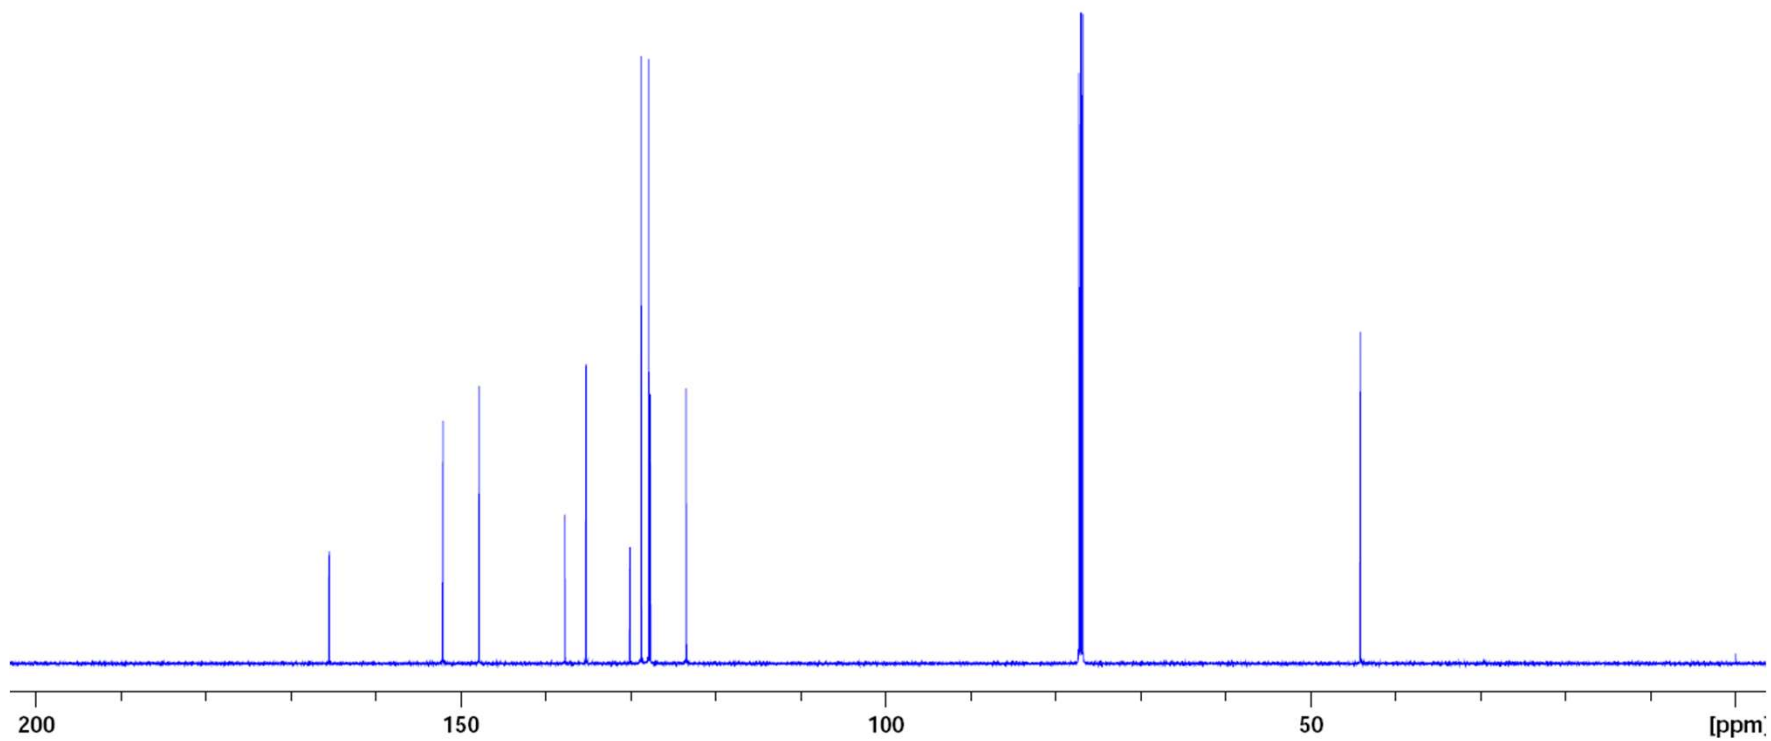

8.518  
8.392  
8.244  
8.231  
7.865  
7.852  
7.839  
7.428  
7.420  
7.408  
7.377  
7.365  
7.357  
7.344  
7.332  
7.293  
7.282  
7.270  
7.262

4.680  
4.670

-0.000

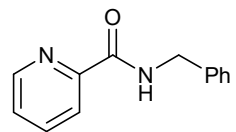

**3r**  
(600 MHz, CDCl<sub>3</sub>)

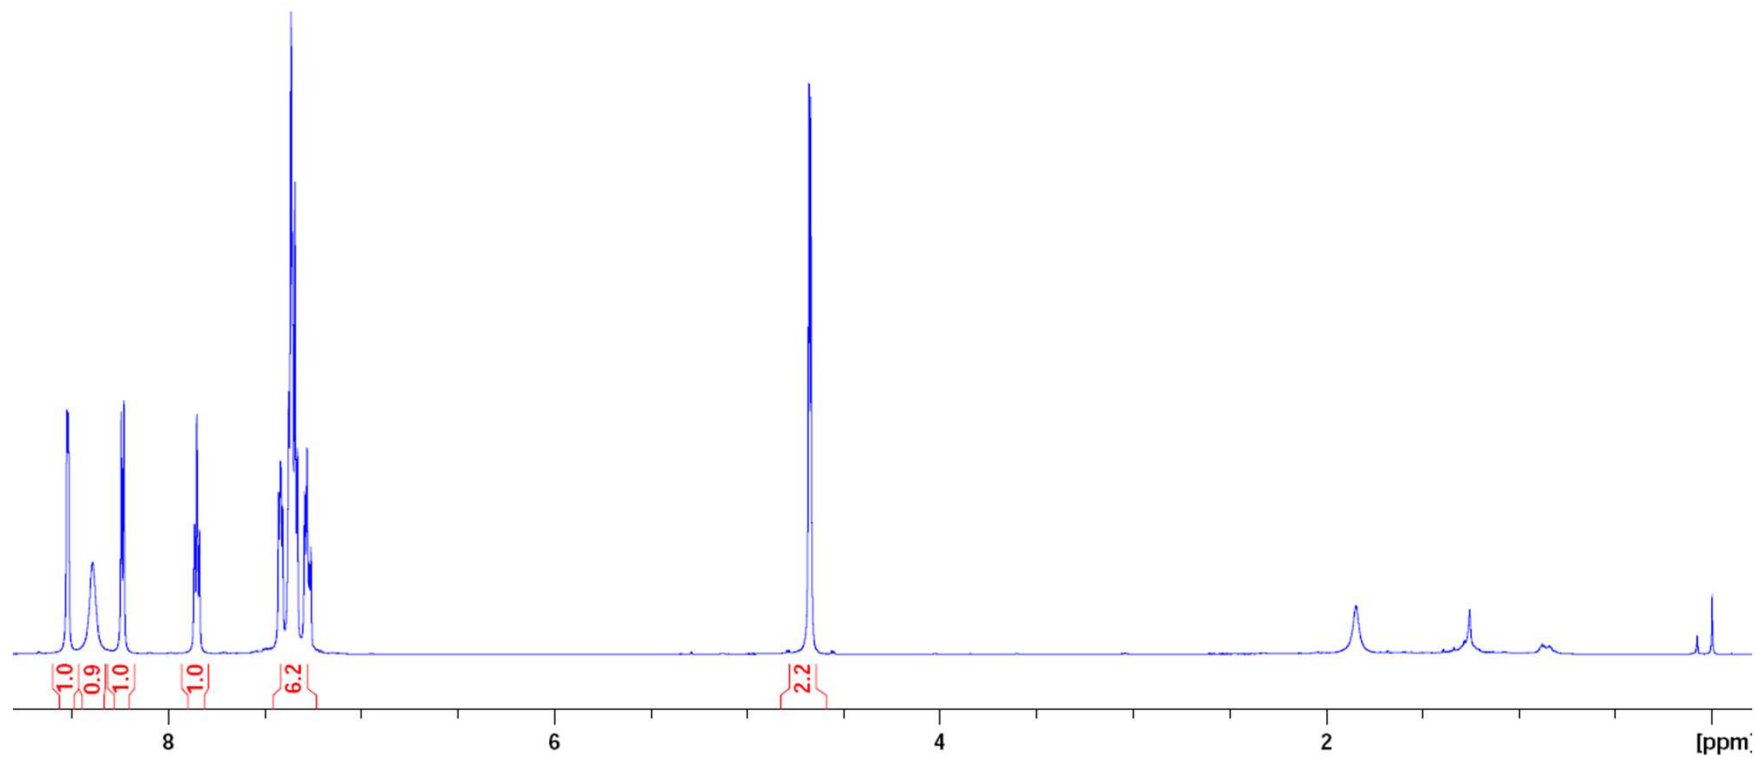

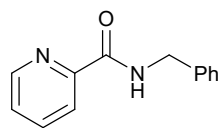

**3r**  
(150 MHz, CDCl<sub>3</sub>)

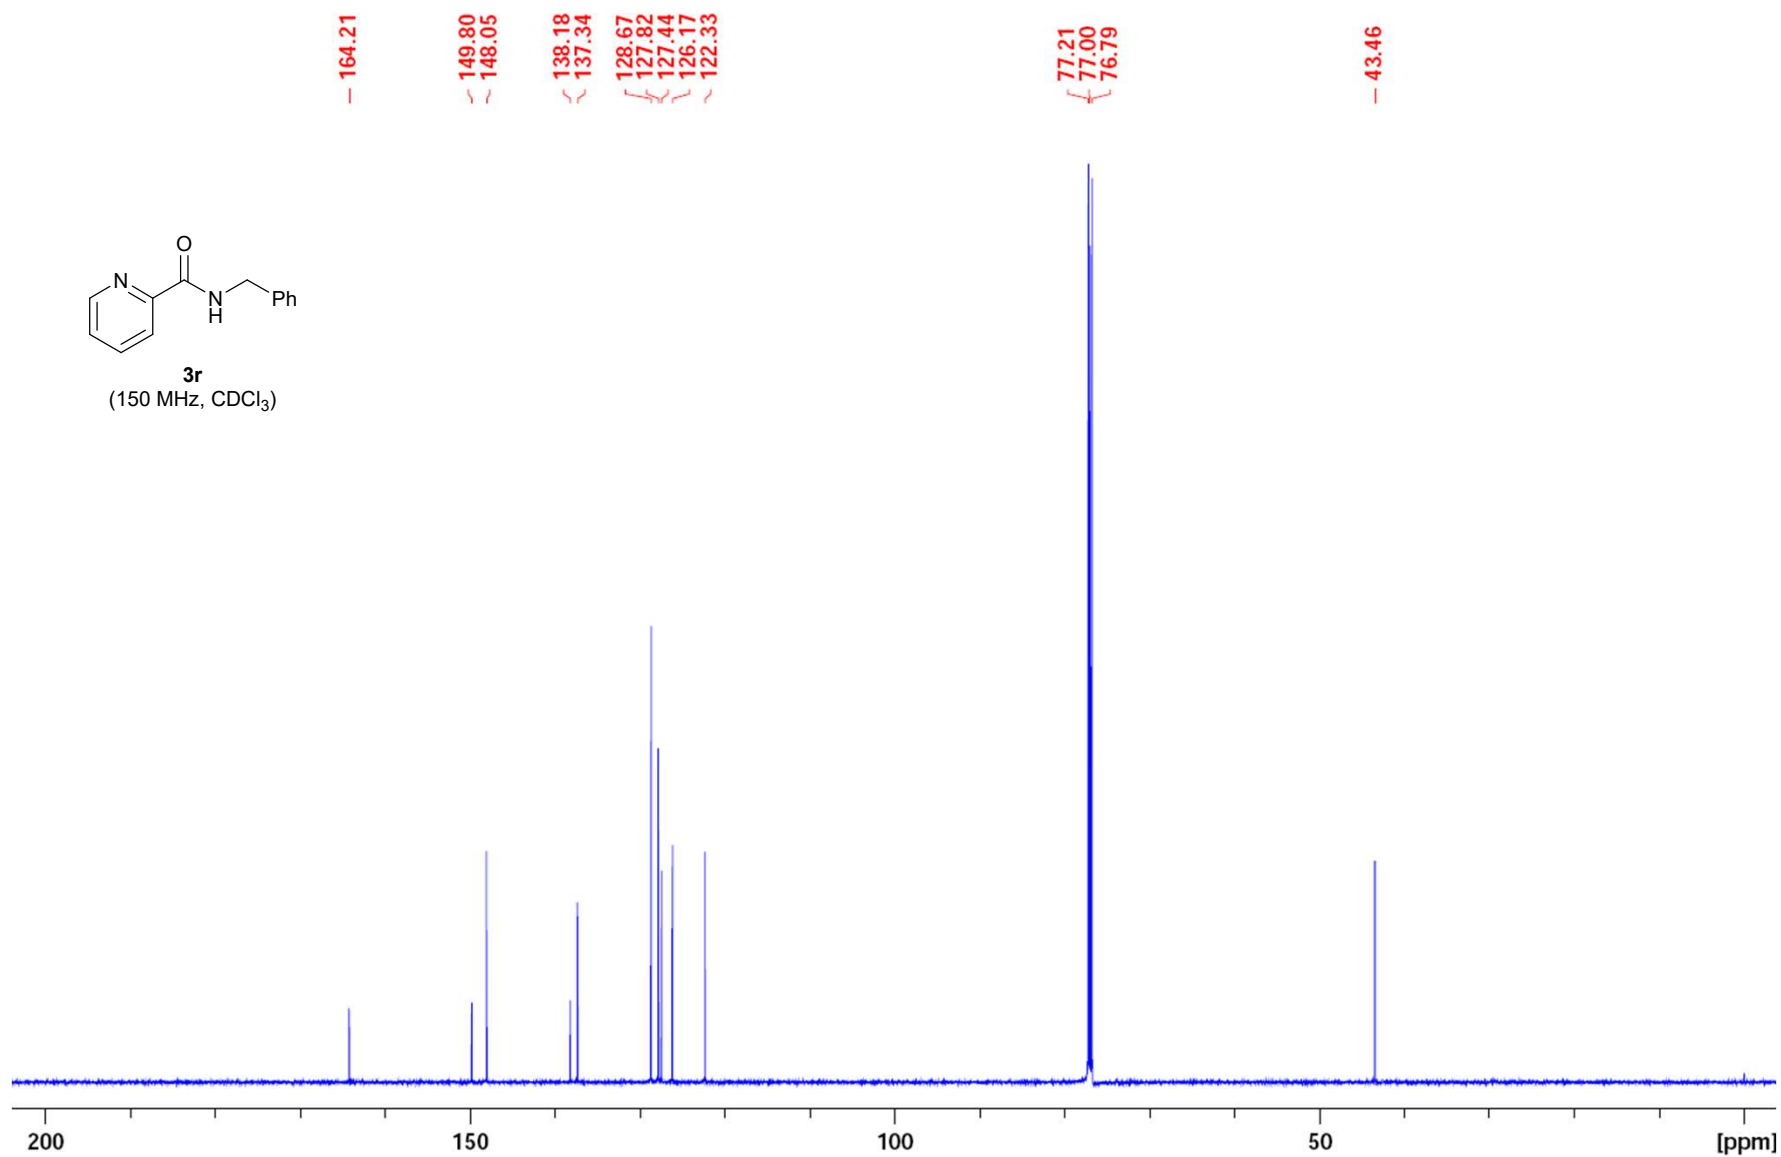

7.876  
7.865  
7.851  
7.838  
7.565  
7.553  
7.541  
7.530  
7.518  
7.506  
7.396  
7.383  
7.376  
7.363  
7.351  
7.317  
7.305  
7.294  
7.253  
6.645

4.701  
4.691

-0.000

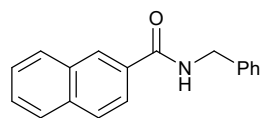

**3s**  
(600 MHz, CDCl<sub>3</sub>)

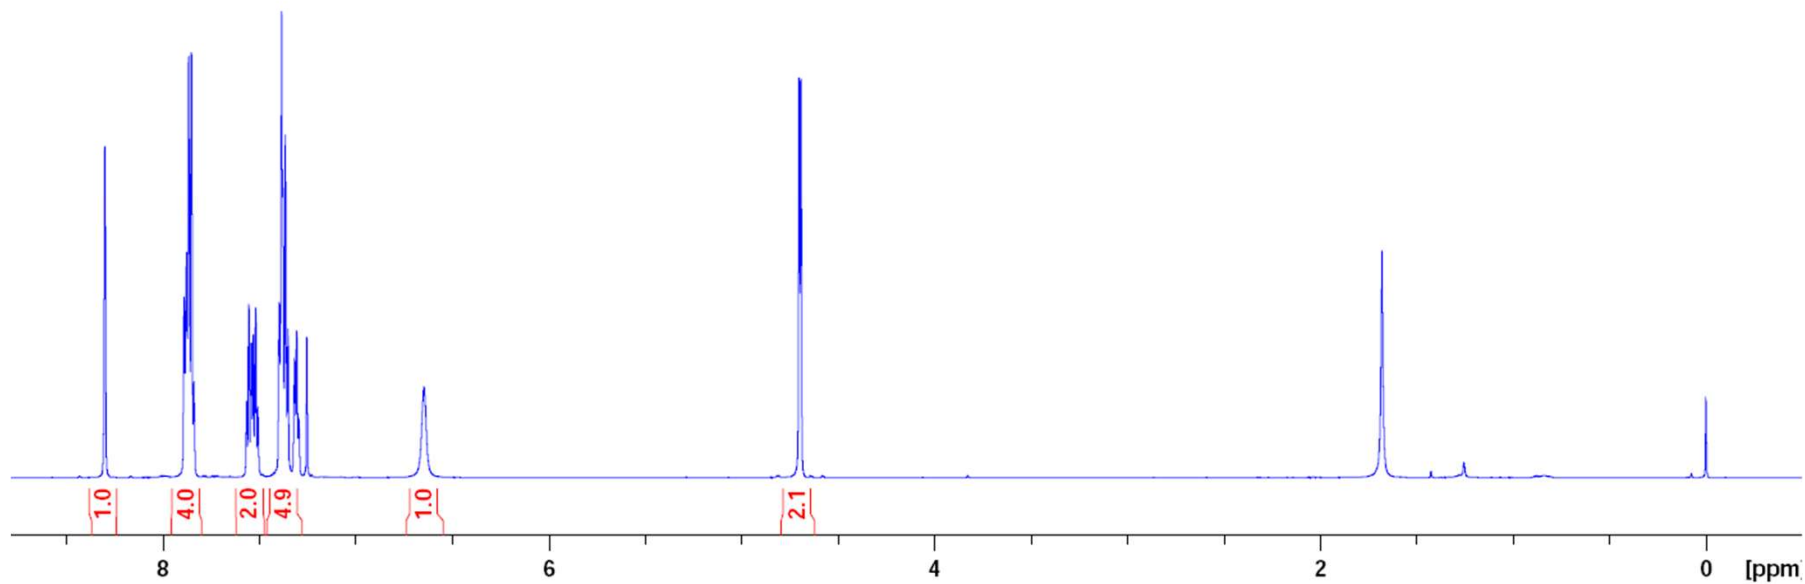

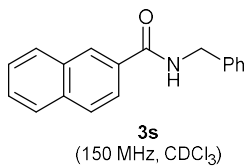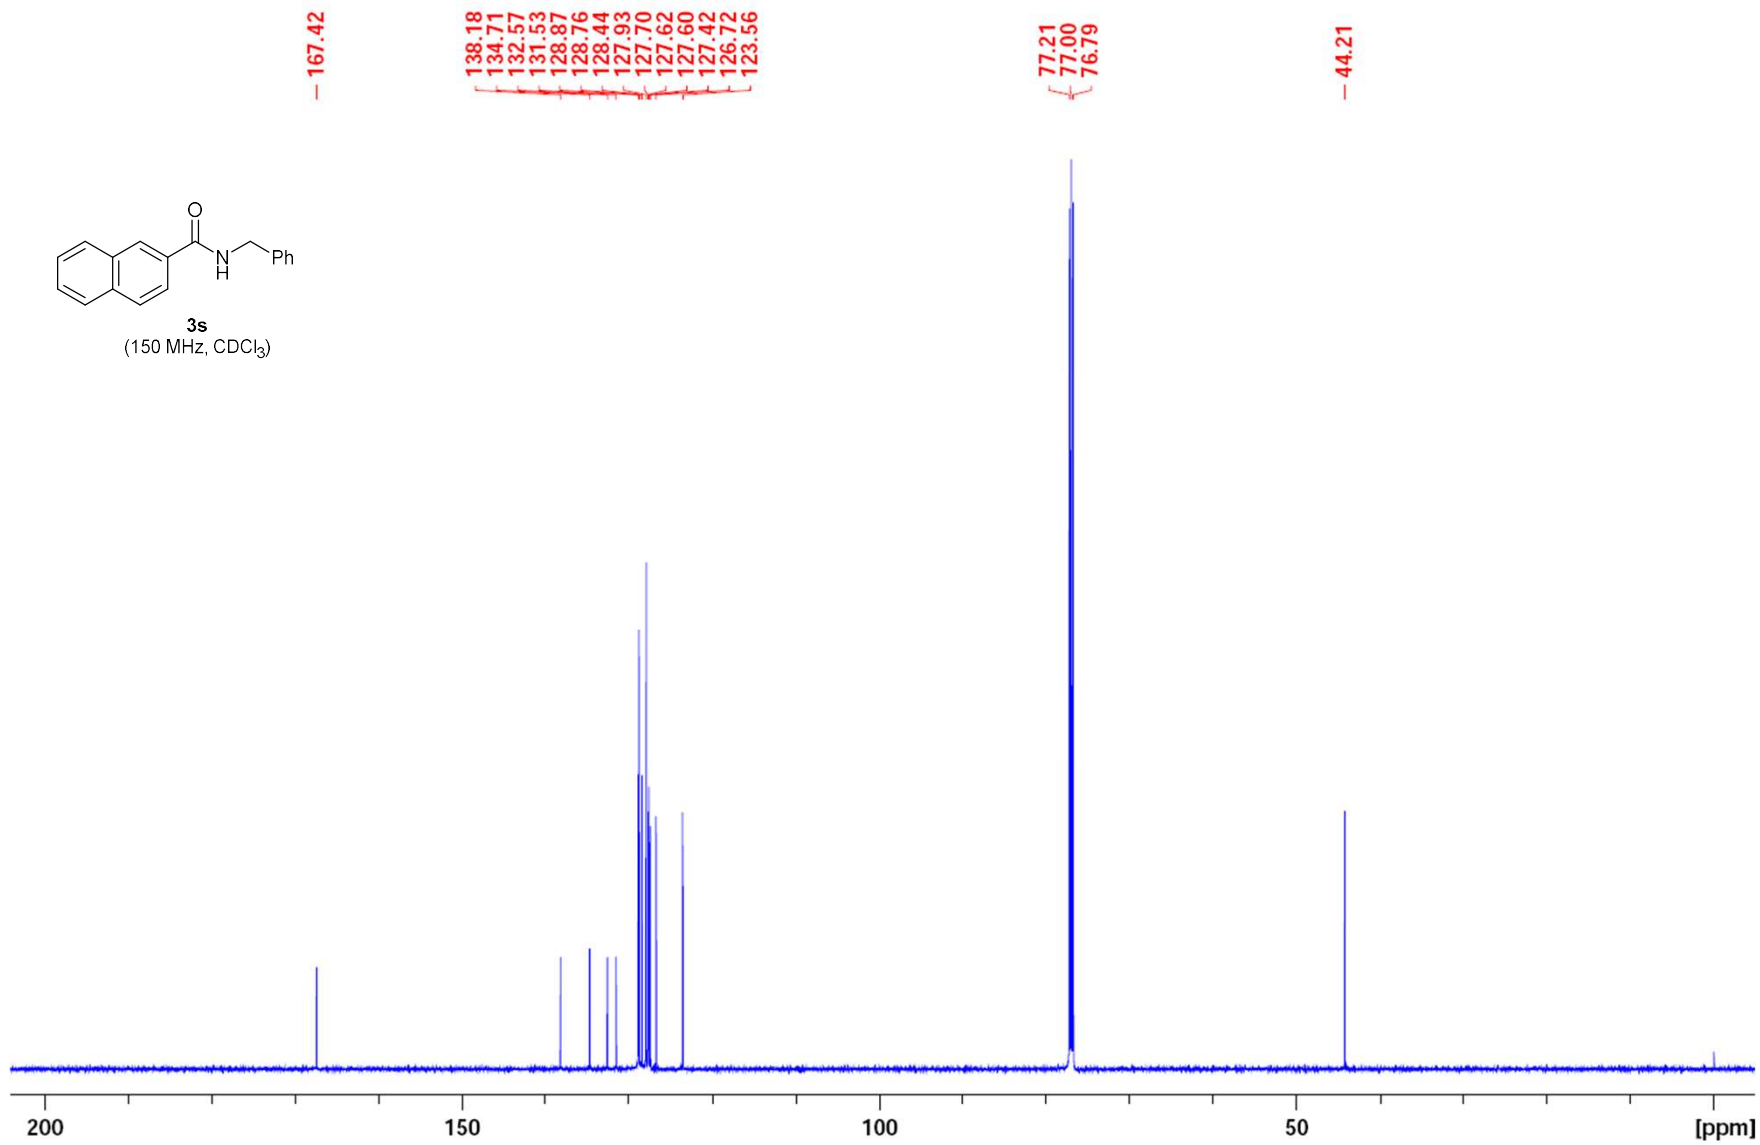

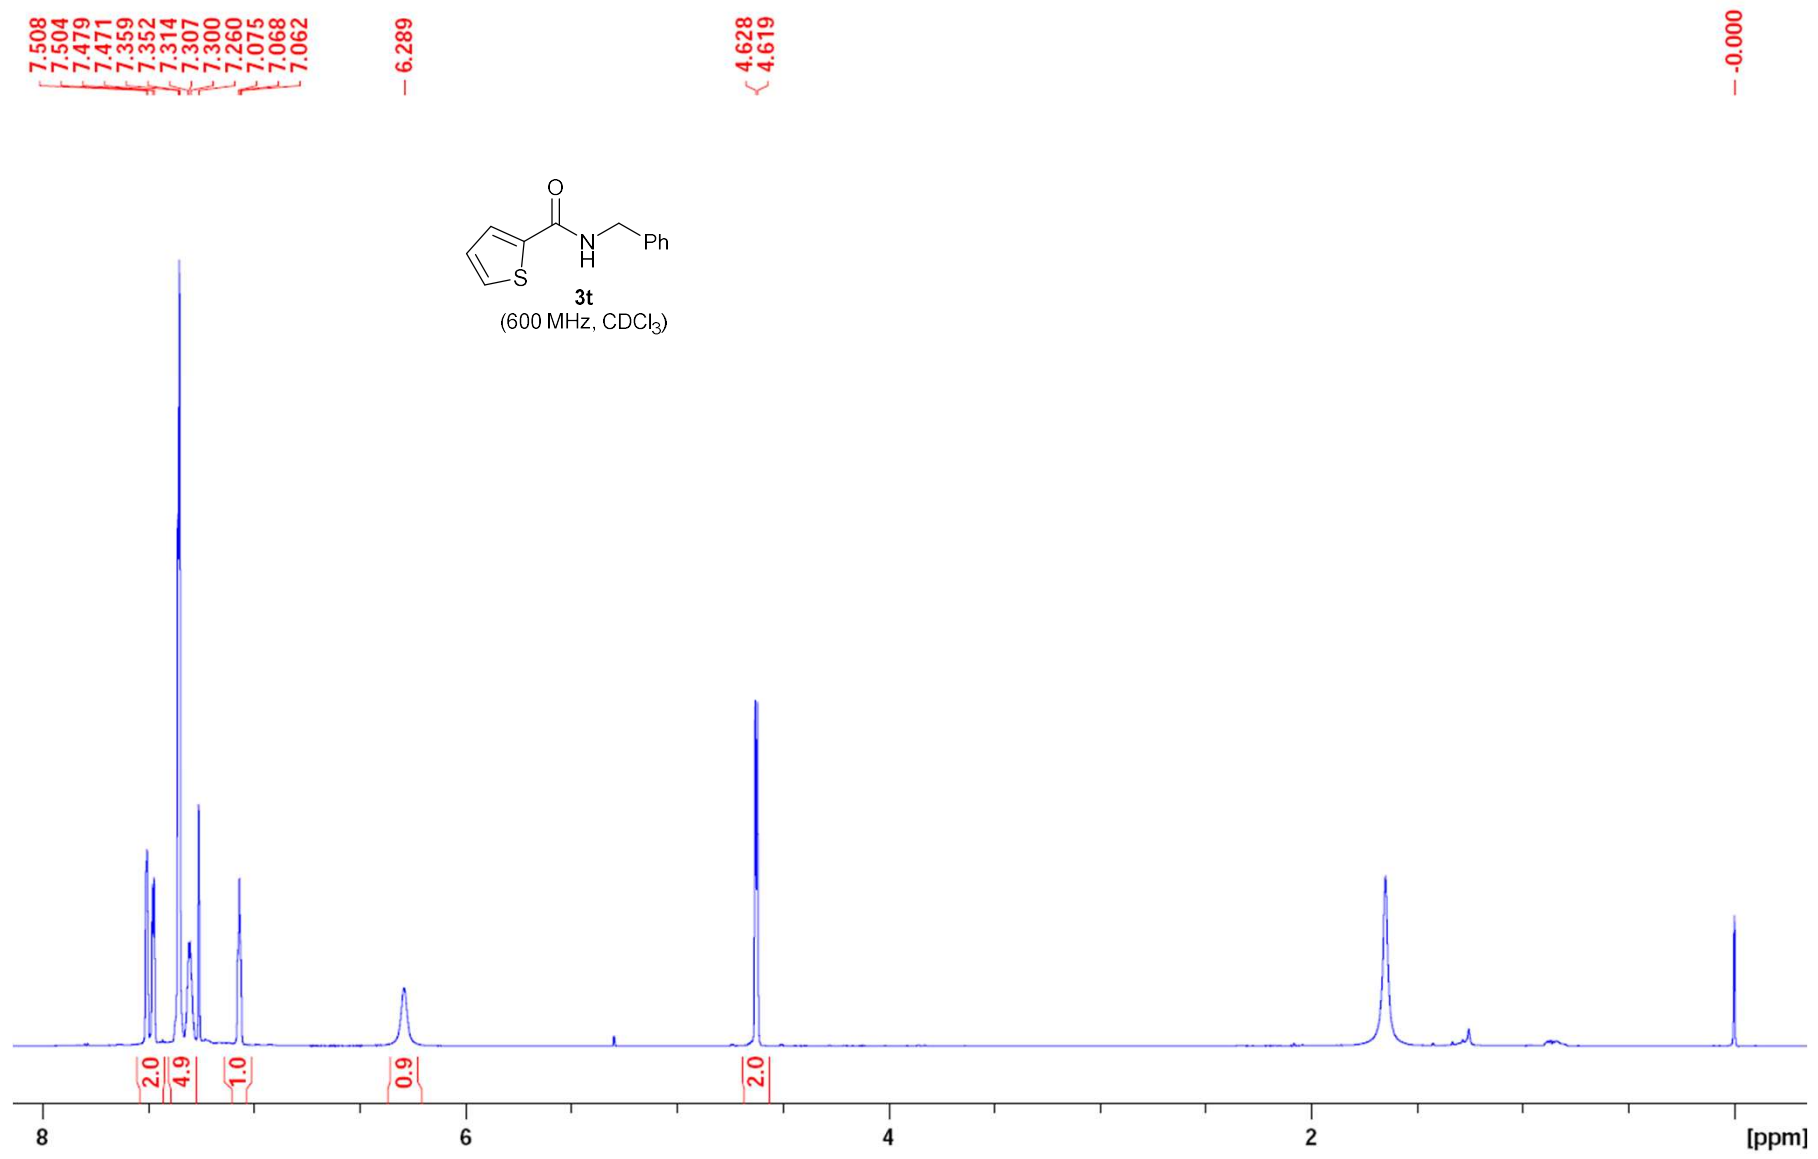

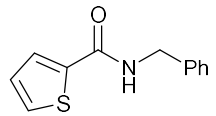

**3t**  
(150 MHz, CDCl<sub>3</sub>)

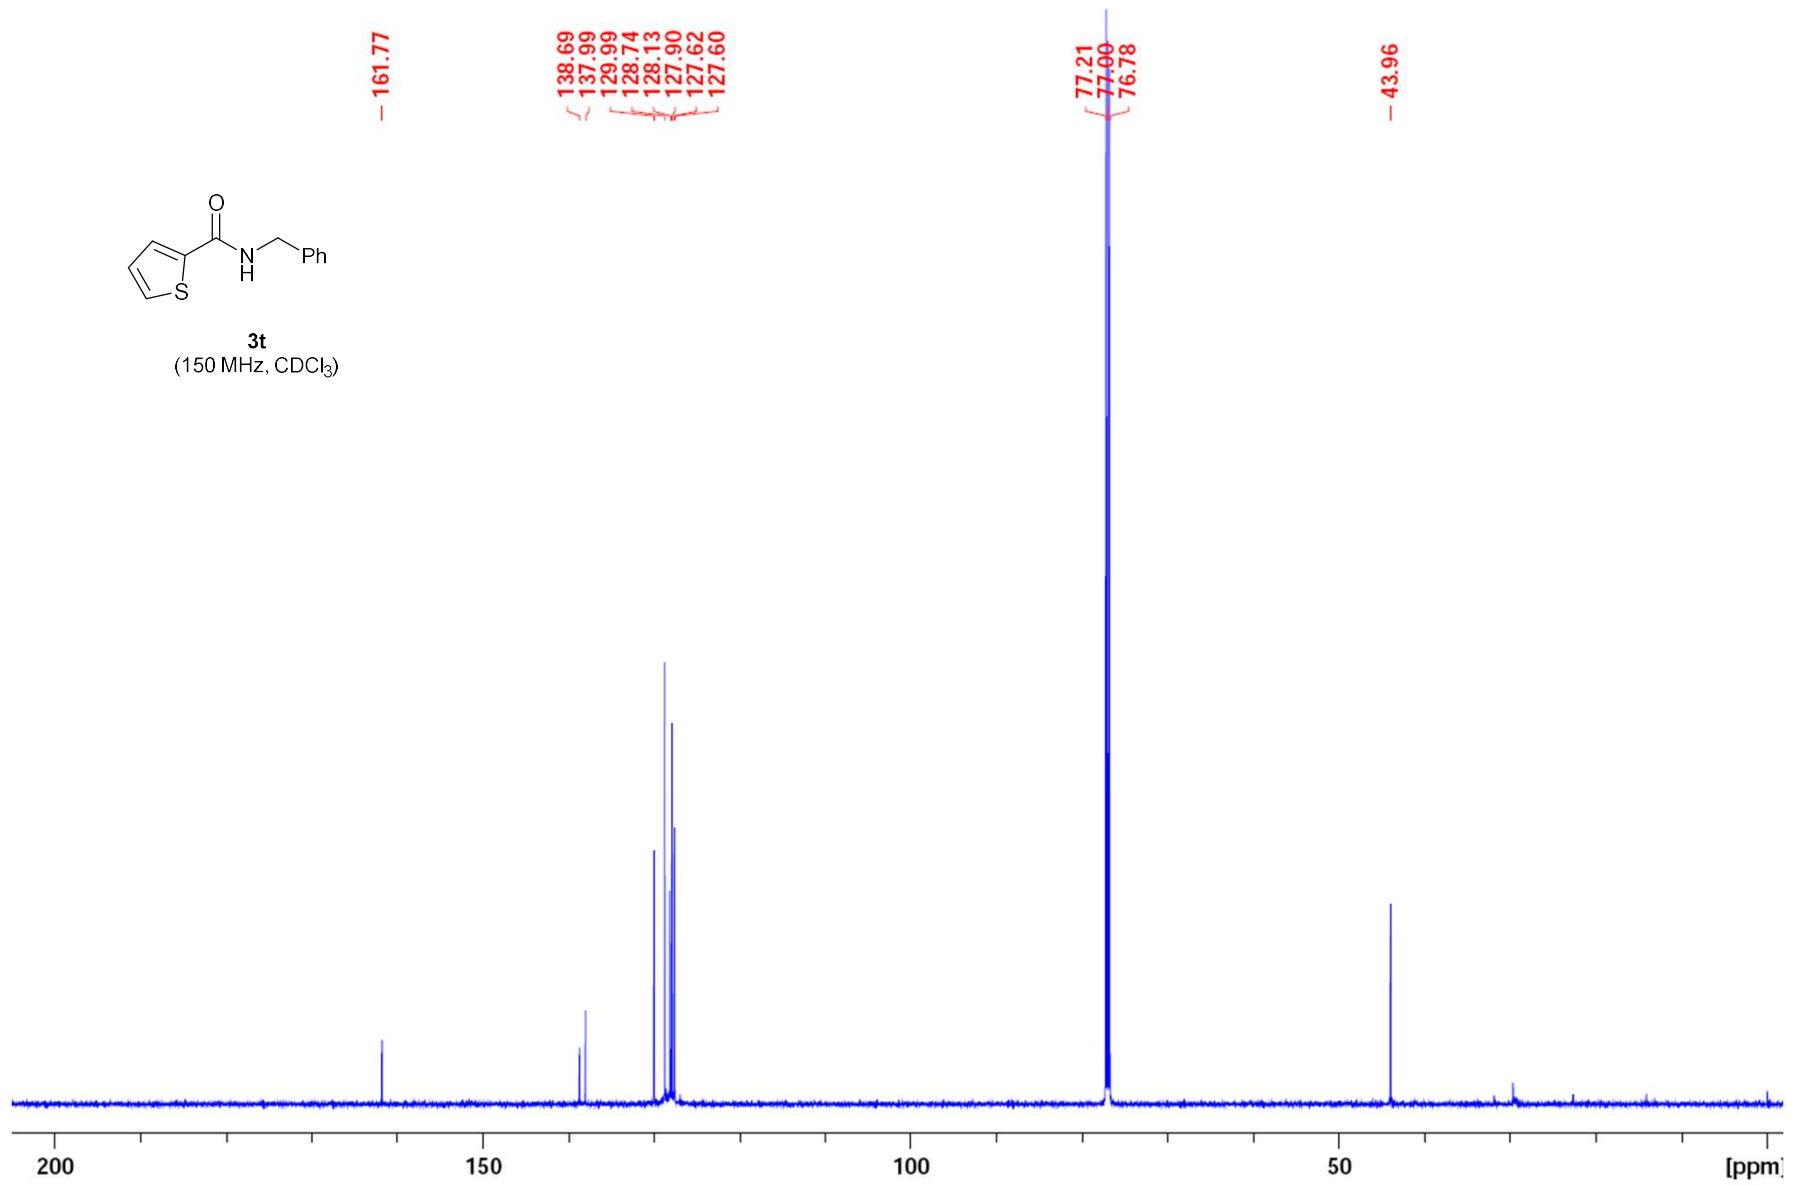

8.211  
8.198  
8.062  
7.863  
7.860  
7.850  
7.847  
7.837  
7.834  
7.433  
7.432  
7.425  
7.424  
7.421  
7.419  
7.413  
7.411  
7.266

3.487  
3.475  
3.465  
3.453

1.662  
1.650  
1.638  
1.626  
1.613  
1.403  
1.338  
1.332  
1.326  
1.320  
1.314  
1.309  
1.254  
0.904  
0.893  
0.881

0.000

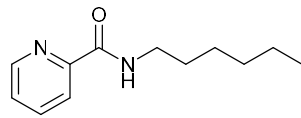

**3u**  
(600 MHz, CDCl<sub>3</sub>)

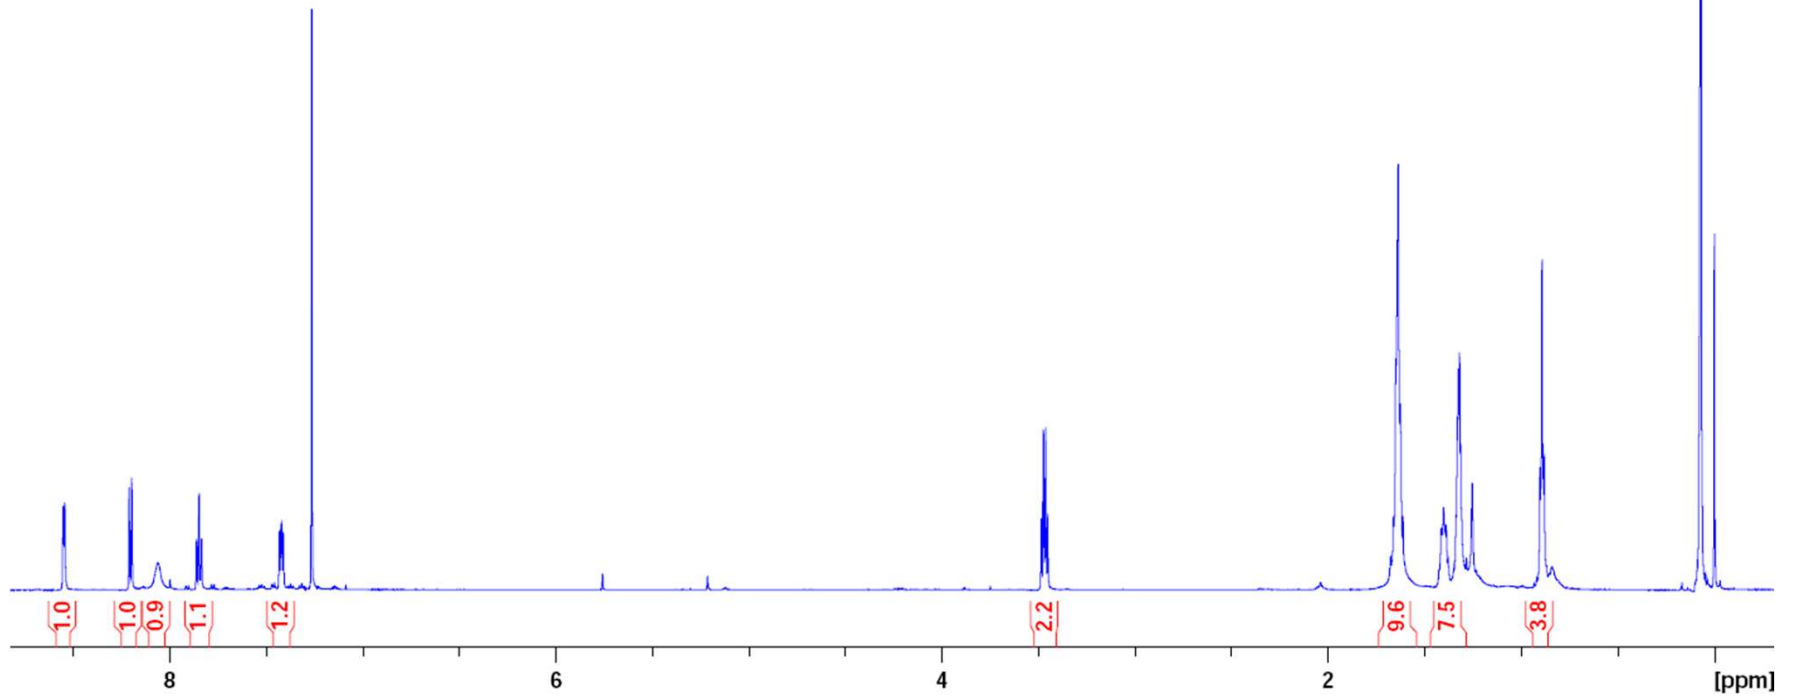

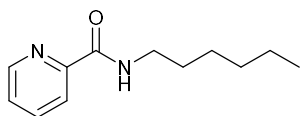

**3u**  
(150 MHz, CDCl<sub>3</sub>)

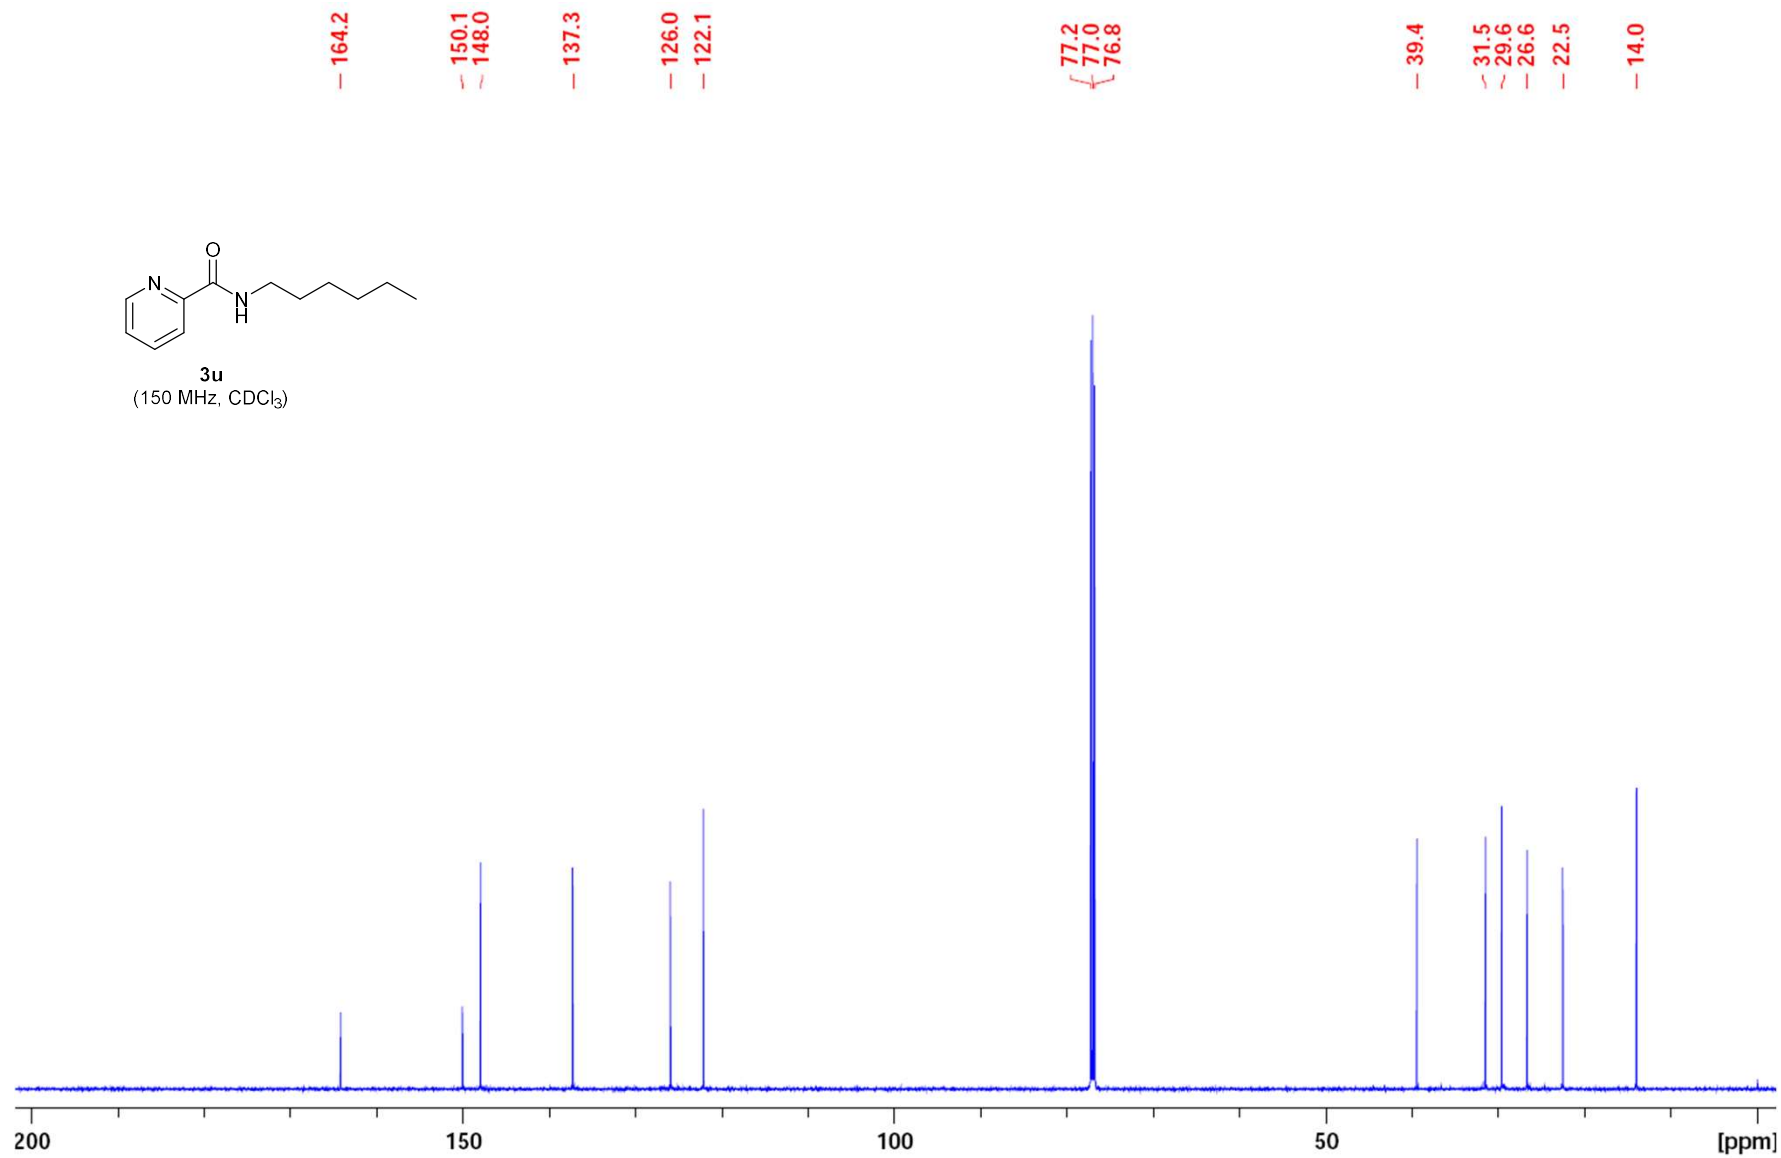

8.545  
8.538  
8.209  
8.196  
7.974  
7.854  
7.841  
7.828  
7.424  
7.415  
7.412  
7.404  
7.277

3.980  
3.972  
3.965  
2.023  
2.007  
2.003  
1.784  
1.778  
1.768  
1.762  
1.756  
1.665  
1.658  
1.649  
1.643  
1.469  
1.449  
1.428  
1.412  
1.407  
1.400  
1.357  
1.353  
1.336  
1.318  
1.316  
1.300  
1.295  
1.268  
1.255  
1.249  
1.228  
1.216

-0.000

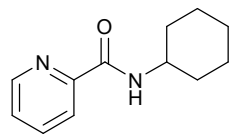

**3v**  
(600 MHz, CDCl<sub>3</sub>)

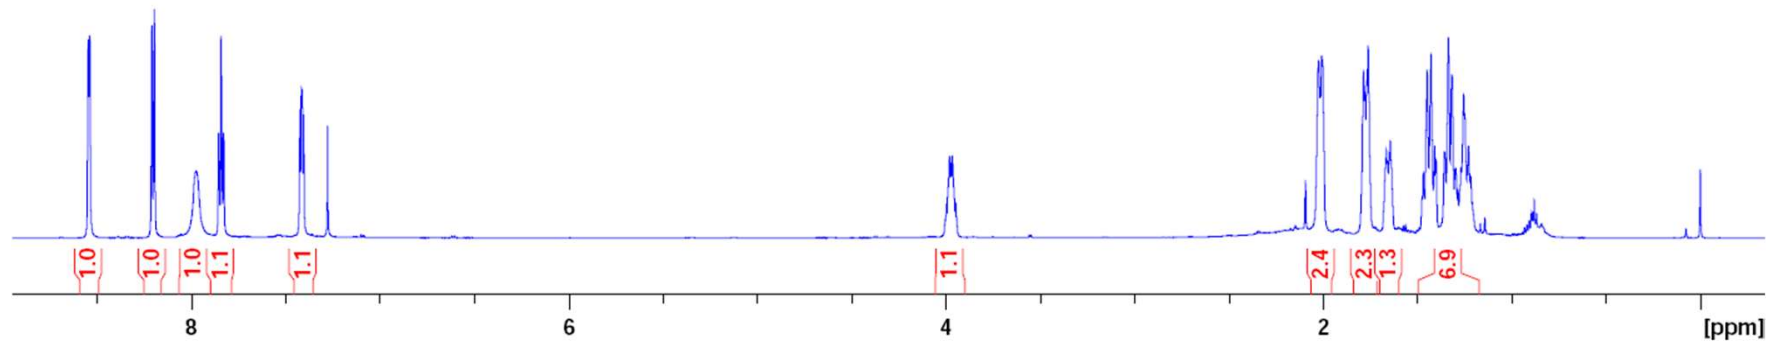

7.696  
7.683  
7.398  
7.384  
7.267

5.967

3.962  
3.956  
3.949

2.032  
2.015  
1.768  
1.762  
1.746  
1.712  
1.671  
1.649  
1.433  
1.412  
1.391  
1.257  
1.239  
1.219  
1.199  
1.192

-0.000

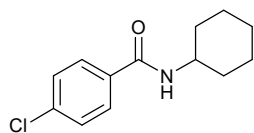

**3w**  
(600 MHz, CDCl<sub>3</sub>)

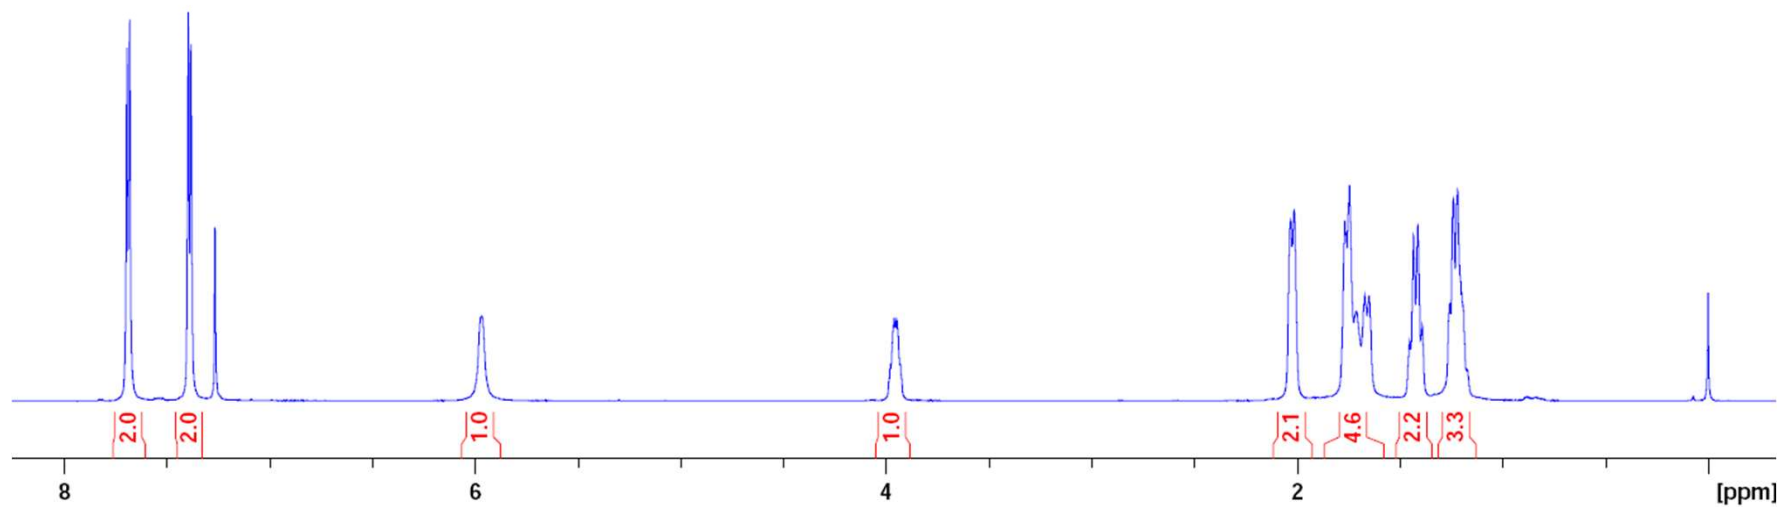

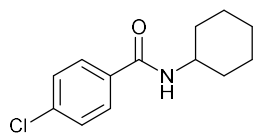

**3w**  
(150 MHz, CDCl<sub>3</sub>)

— 165.5

— 137.4

— 133.4

{ 128.7

{ 128.3

{ 77.2

{ 77.0

{ 76.8

— 48.8

— 33.1

{ 25.5

{ 24.9

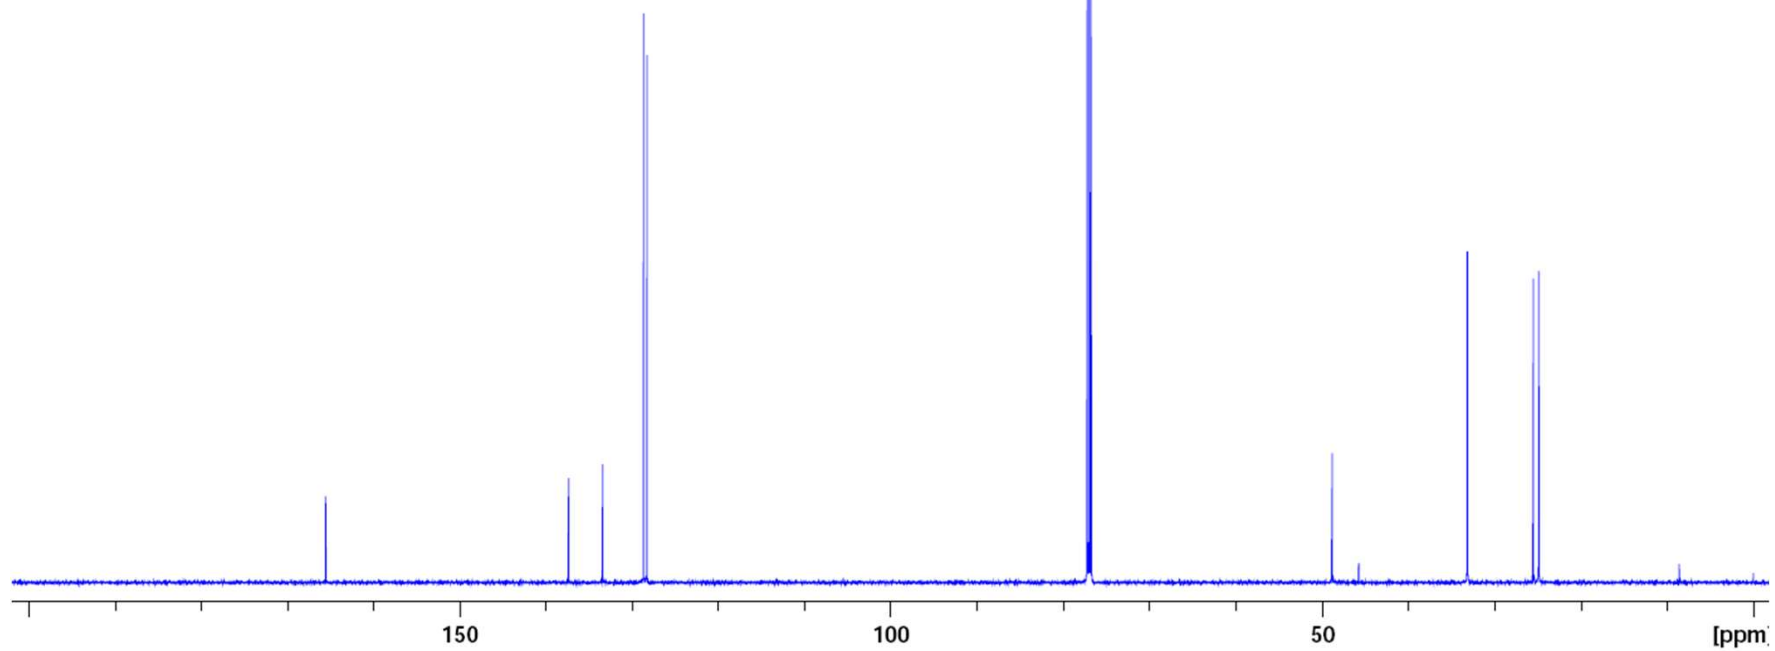

7.703  
7.689  
7.367  
7.353  
7.271  
6.944

3.803  
3.795  
3.787  
3.594  
3.585  
3.577  
3.569  
3.298

-0.000

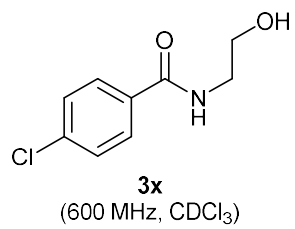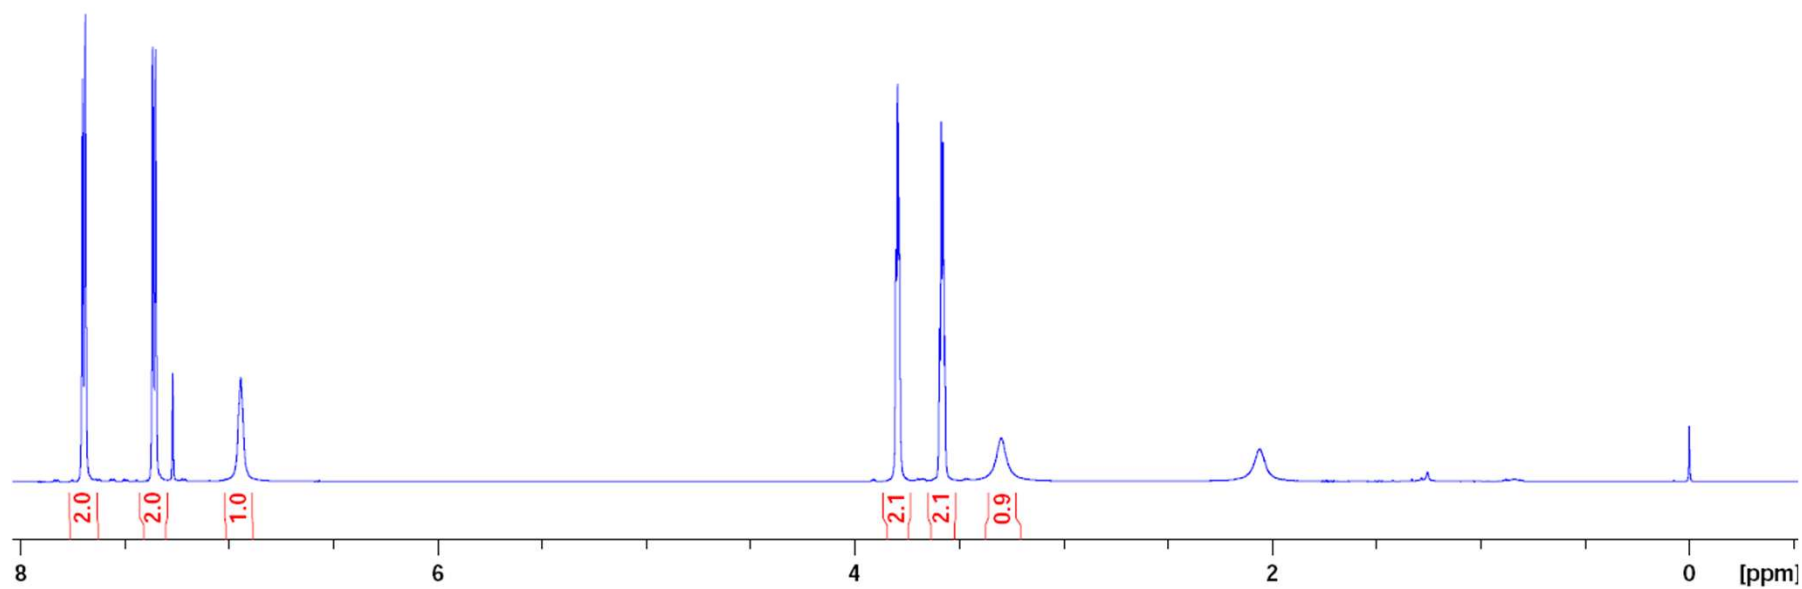

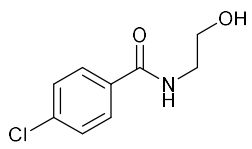

**3x**  
(150 MHz, CDCl<sub>3</sub>)

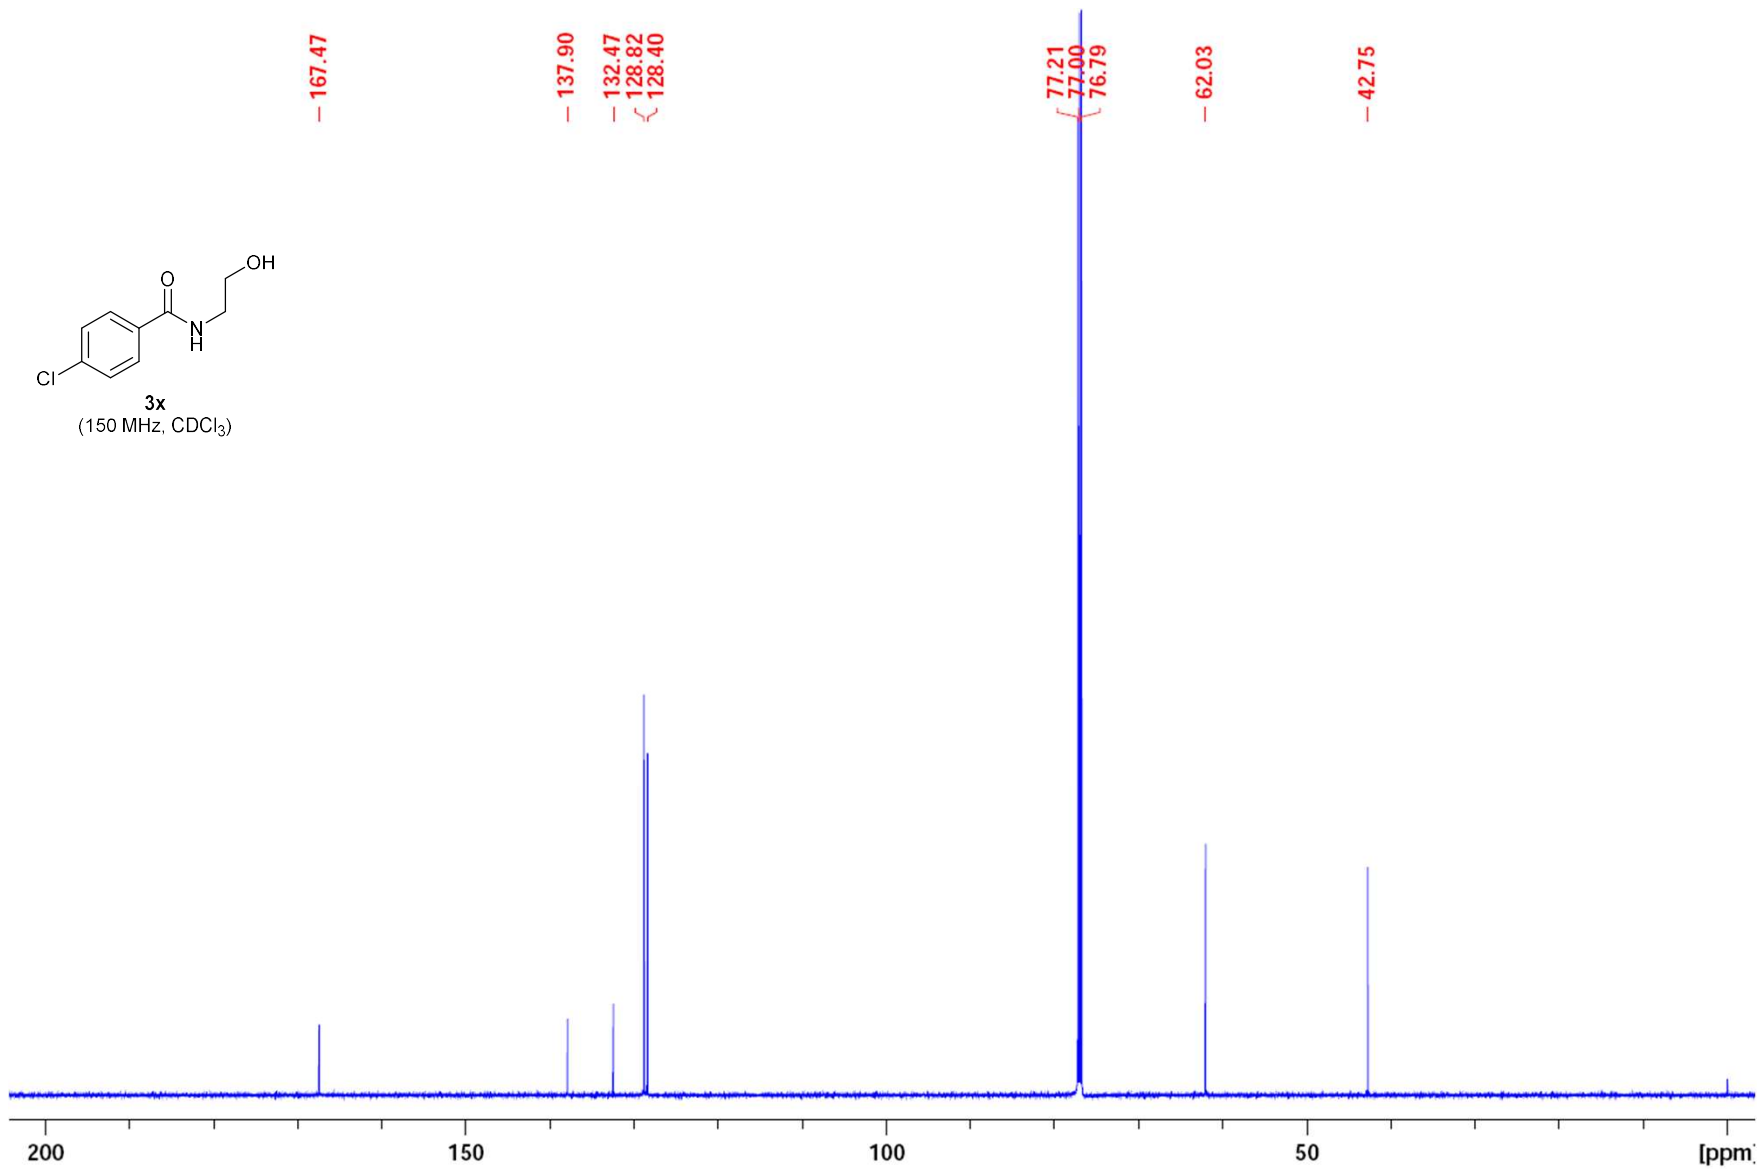

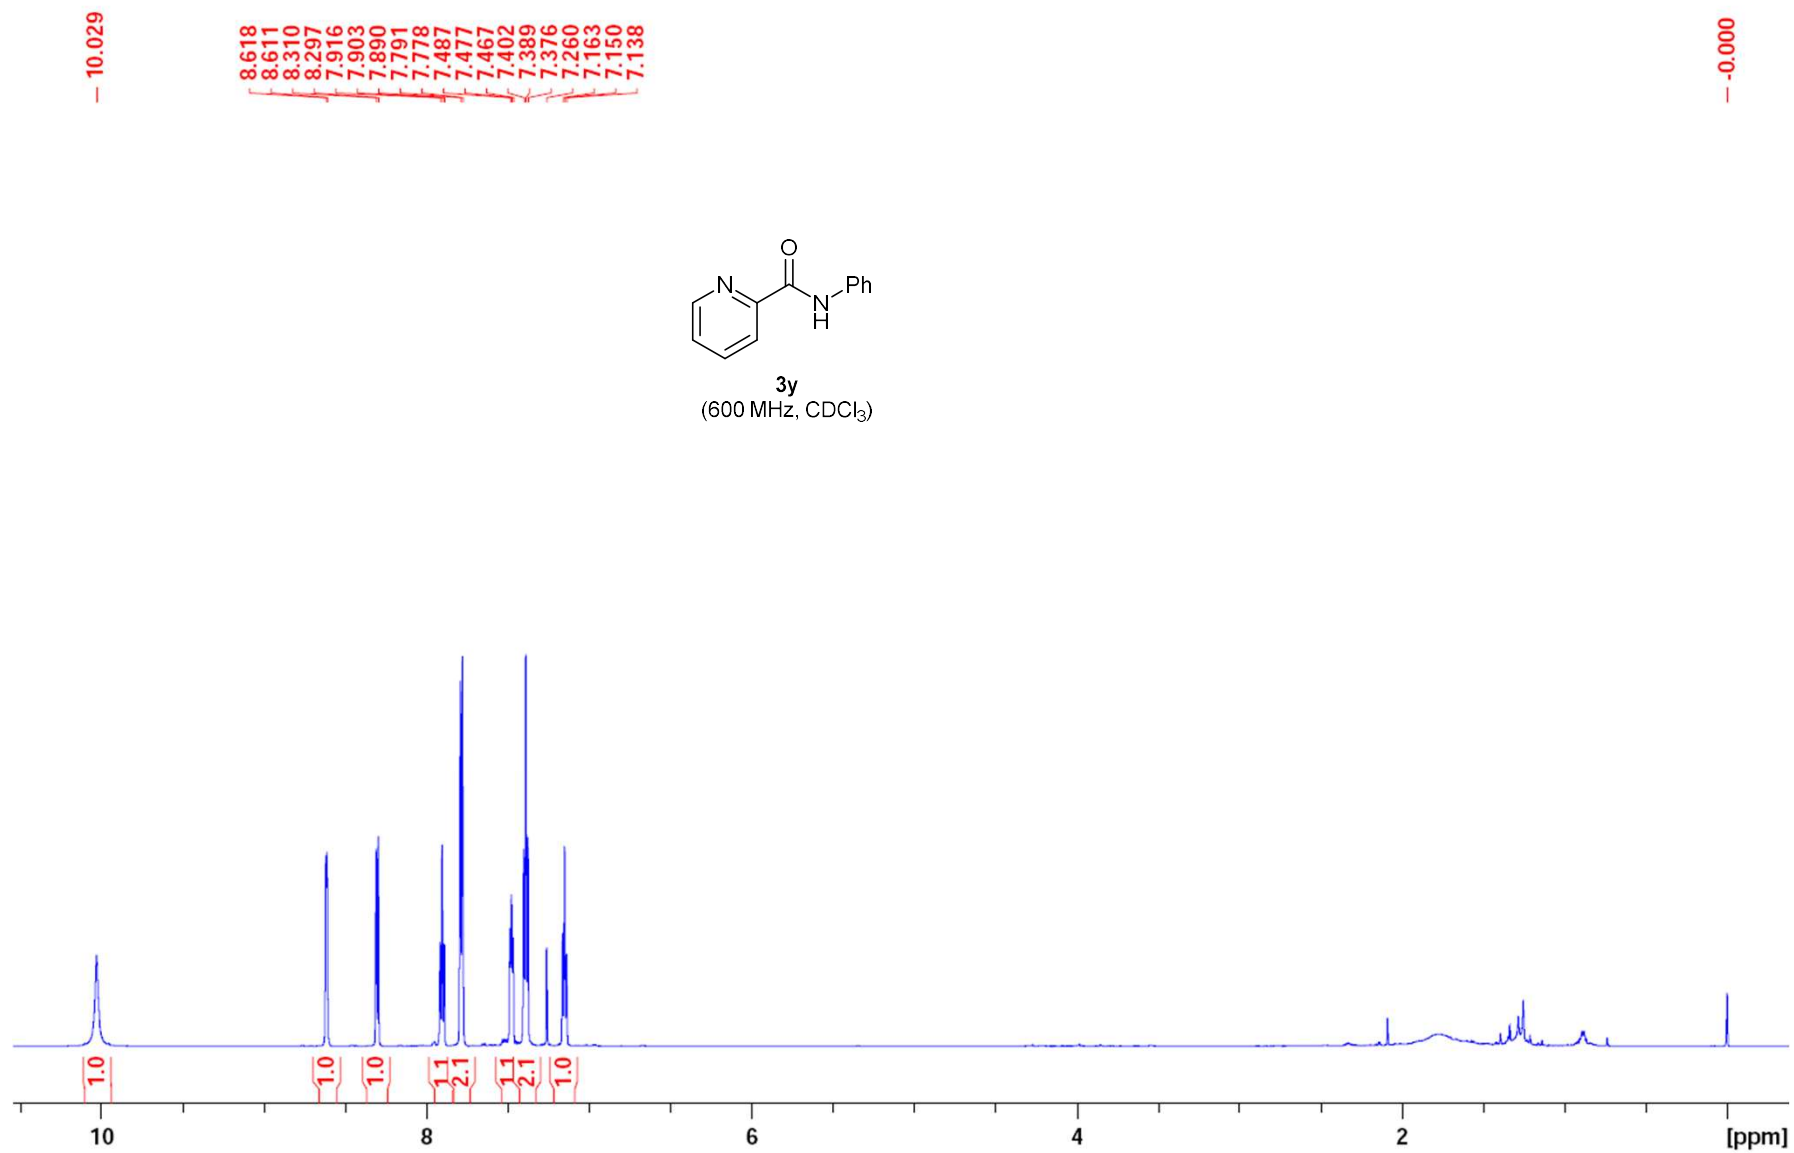

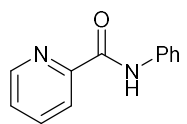

**3y**  
(150 MHz, CDCl<sub>3</sub>)

161.96  
149.77  
147.92  
137.70  
137.64  
129.04  
126.41  
124.27  
122.37  
119.65  
77.21  
77.00  
76.79

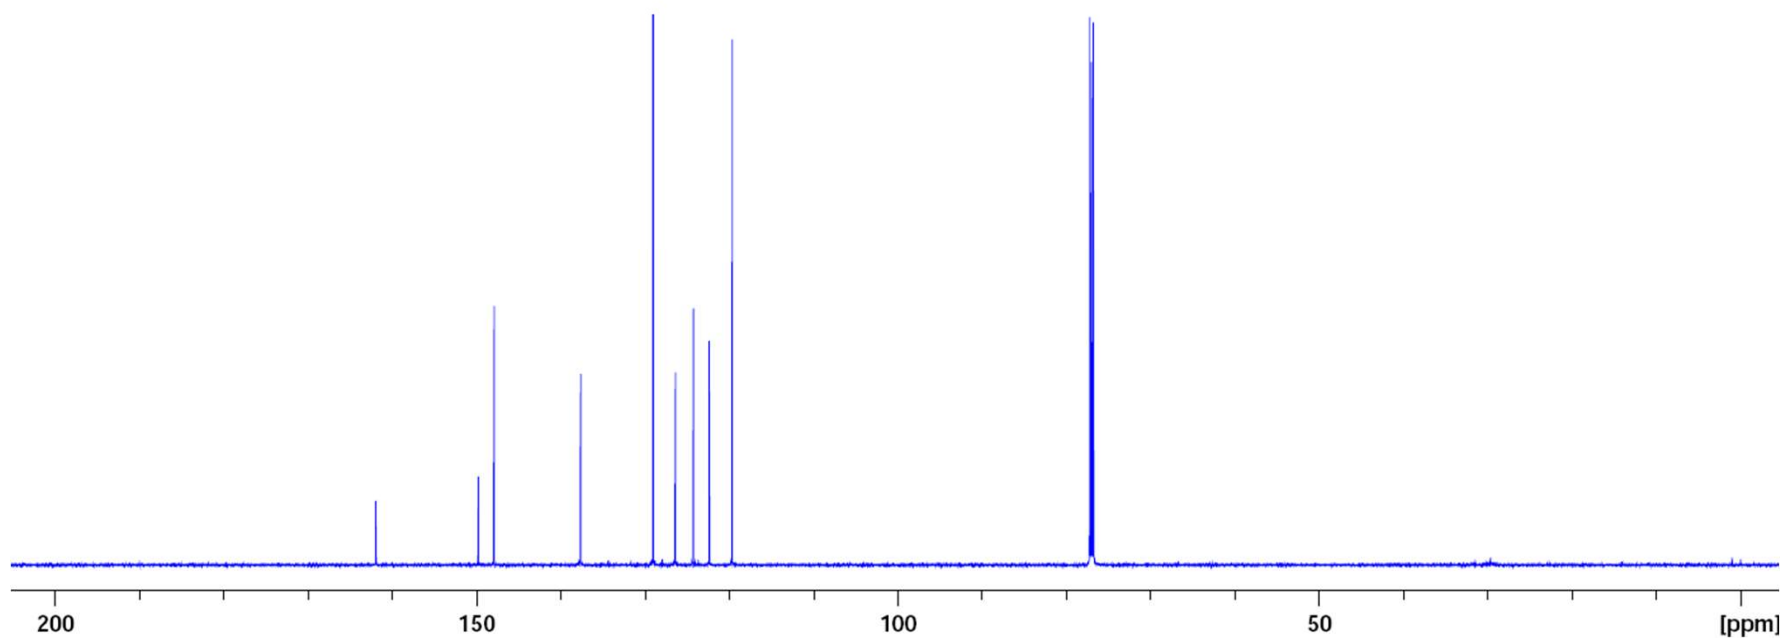

7.882  
7.874  
7.871  
7.867  
7.782  
7.779  
7.767  
7.756  
7.753  
7.484  
7.480  
7.477  
7.469  
7.466  
7.462  
7.264  
7.092  
7.090  
7.083  
7.082  
7.080  
7.078  
7.071  
7.070

-0.000

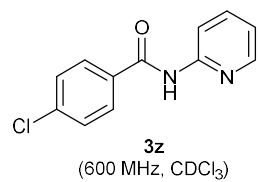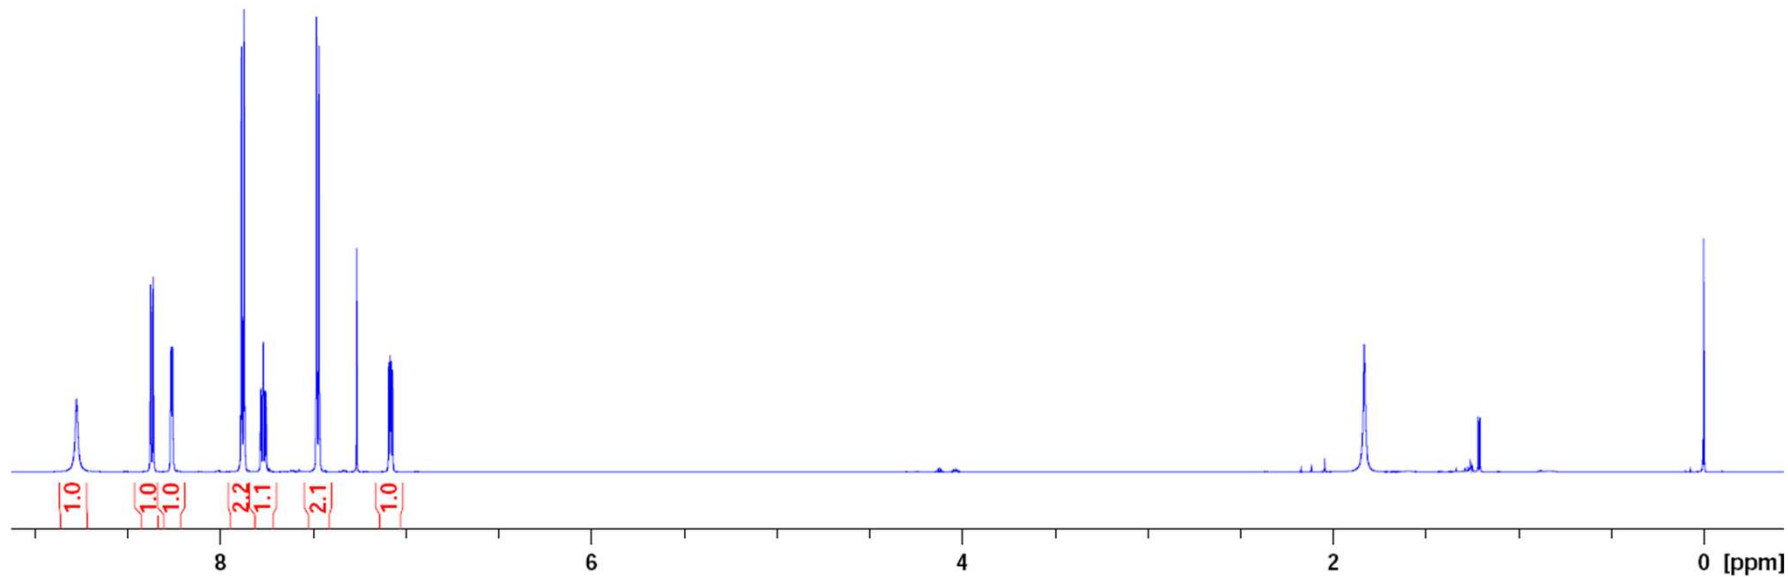

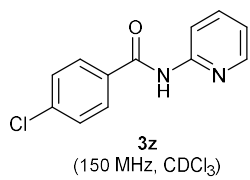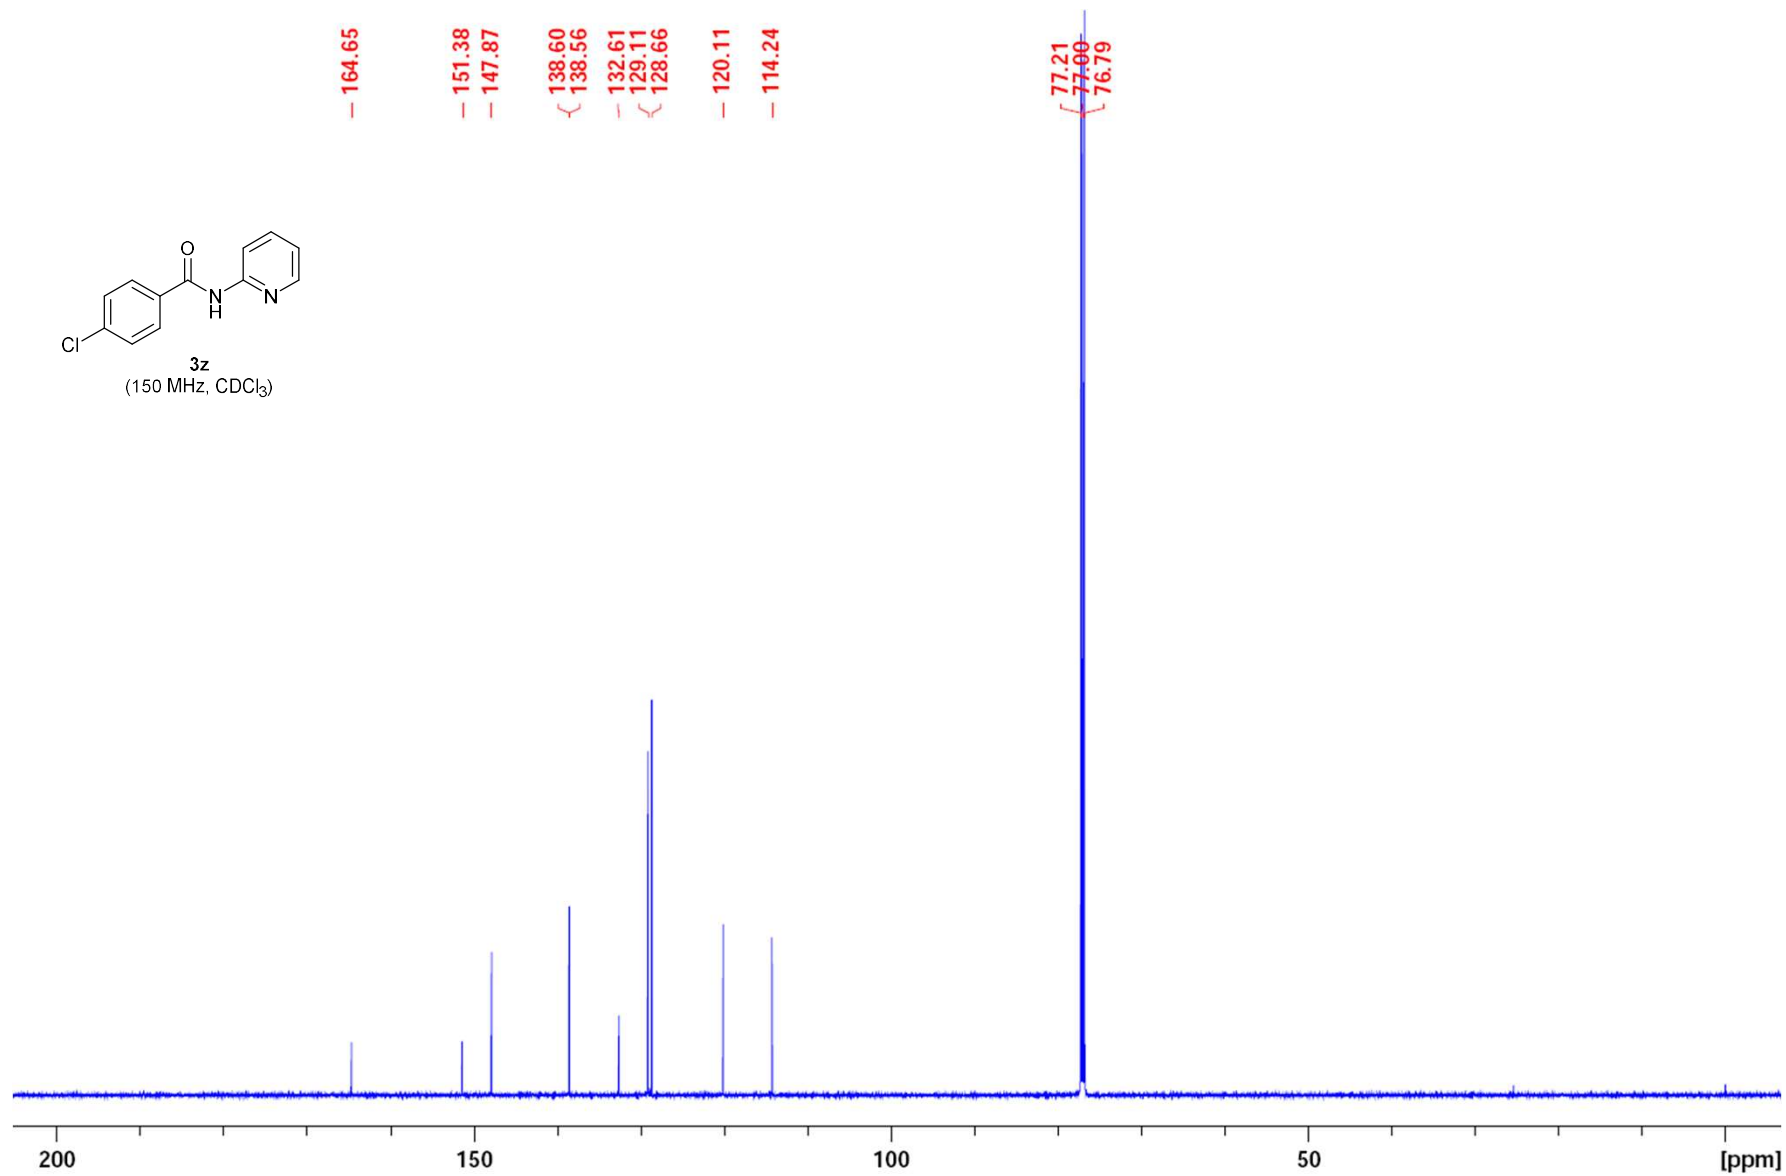

Supplement: d6ra03708a1.pdf [file d6ra03708a1.pdf]
